# Supplementary material
Source: PubMed Central journal article supplement (PMC2765519)
Supplement: NIHMS86662-supplement-1_si_001.pdf [file NIHMS86662-supplement-1_si_001.pdf]

**Theoretical Calculation of Electronic Circular Dichroism on a Hexahydroxydiphenyl-  
containing Flavanone Glycoside**

Yuanqing Ding,<sup>†</sup> Xing-Cong Li,<sup>\*,†,‡</sup> and Daneel Ferreira<sup>\*,†,‡</sup>

*National Center for Natural Products Research, Research Institute of Pharmaceutical Sciences  
and Department of Pharmacognosy, School of Pharmacy, The University of Mississippi,  
University, Mississippi 38677*

**Table of Contents**

|                                                                                                                                                                            |    |
|----------------------------------------------------------------------------------------------------------------------------------------------------------------------------|----|
| <b>Figure S1.</b> Potential energy surfaces of <b>1</b> at the B3LYP/6-31G** level in the gas phase.....                                                                   | S3 |
| <b>Figure S2.</b> Optimized geometry of conformer of mattucinol-7- <i>O</i> - $\beta$ -L-glucopyranoside ( <b>L-1a1</b> ) at the B3LYP/6-31G** level in the gas phase..... | S3 |
| <b>Figure S3.</b> Optimized geometries of compound <b>2</b> at the B3LYP/6-31G** level in the gas phase...                                                                 | S4 |
| <b>Figure S4.</b> Optimized geometries of compound <b>3</b> at the B3LYP/6-31G** level in the gas phase...                                                                 | S5 |
| <b>Figure S5.</b> Optimized geometries of compound <b>4</b> at the B3LYP/6-31G** level in the gas phase...                                                                 | S5 |
| <b>Figure S6.</b> Experimental and calculated ECD of <b>1</b> at the B3LYP-SCRF/6-31G**//B3LYP/6-31G** level with COSMO model in MeOH ( $\sigma = 0.20\text{eV}$ ).....    | S5 |
| <b>Figure S7.</b> Experimental and calculated ECD of <b>1</b> at the B3LYP/6-311++G**//B3LYP/6-31G** level in the gas phase ( $\sigma = 0.20\text{eV}$ ).....              | S6 |
| <b>Figure S8.</b> Experimental and calculated ECD of <b>1</b> at the B3PW91/6-31G**//B3LYP/6-31G** level in the gas phase ( $\sigma = 0.20\text{eV}$ ).....                | S6 |
| <b>Figure S9.</b> Calculated ECD of <b>L-1a1</b> and <b>1a1</b> at the B3LYP/6-31G** level in the gas phase.....                                                           | S7 |
| <b>Figure S10.</b> Experimental and calculated ECD of <b>2</b> at the B3LYP/6-311++G**//B3LYP/6-31G** level in the gas phase ( $\sigma = 0.20\text{eV}$ ).....             | S7 |
| <b>Figure S11.</b> Experimental and calculated ECD of <b>2</b> at the B3LYP-SCRF/6-31G**//B3LYP/6-31G** level with COSMO model in MeOH ( $\sigma = 0.20\text{eV}$ ).....   | S8 |
| <b>Figure S12.</b> Experimental and calculated ECD of <b>2</b> at the B3PW91/6-31G**//B3LYP/6-31G** level in the gas phase ( $\sigma = 0.20\text{eV}$ ).....               | S8 |

|                                                                                                                                                                               |     |
|-------------------------------------------------------------------------------------------------------------------------------------------------------------------------------|-----|
| <b>Figure S13.</b> Molecular orbitals involved in key transitions in ECD spectrum of <b>4b1</b> at the B3LYP/6-31G** level in the gas phase.....                              | S9  |
| <b>Table S1.</b> Optimized Z-Matrixes of <b>1</b> in the Gas Phase (Å).....                                                                                                   | S9  |
| <b>Table S2.</b> Optimized Z-Matrixes of <b>2</b> in the Gas Phase (Å).....                                                                                                   | S15 |
| <b>Table S3.</b> Optimized Z-Matrixes of <b>3</b> in the Gas Phase (Å).....                                                                                                   | S23 |
| <b>Table S4.</b> Optimized Z-Matrixes of <b>4</b> in the Gas Phase (Å).....                                                                                                   | S25 |
| <b>Table S5:</b> Important Thermodynamic Parameters of Compound <b>1</b> (au).....                                                                                            | S27 |
| <b>Table S6.</b> Conformational Analysis of Compound <b>1</b> .....                                                                                                           | S28 |
| <b>Table S7:</b> Important Thermodynamic Parameters of Compound <b>2</b> (au).....                                                                                            | S28 |
| <b>Table S8.</b> Conformational Analysis of Compound <b>2</b> .....                                                                                                           | S29 |
| <b>Table S9:</b> Important Thermodynamic Parameters of Compound <b>3</b> in the Gas Phase (au).....                                                                           | S30 |
| <b>Table S10.</b> Conformational Analysis of Compound <b>3</b> in the Gas Phase.....                                                                                          | S30 |
| <b>Table S11:</b> Important Thermodynamic Parameters of Compound <b>4</b> in the Gas Phase (au).....                                                                          | S30 |
| <b>Table 12.</b> Conformational Analysis of Compound <b>4</b> in the Gas Phase.....                                                                                           | S30 |
| <b>Table S13.</b> Frequencies of Compound <b>1</b> at the B3LYP/6-31G** Level in the Gas Phase (cm <sup>-1</sup> ...                                                          | S31 |
| <b>Table S14.</b> Frequencies of Compound <b>2</b> at the B3LYP/6-31G** Level in the Gas Phase (cm <sup>-1</sup> ...                                                          | S33 |
| <b>Table S15.</b> Frequencies of Compound <b>3</b> at the B3LYP/6-31G** Level in the Gas Phase (cm <sup>-1</sup> )...S36                                                      |     |
| <b>Table S16.</b> Frequencies of Compound <b>4</b> at the B3LYP/6-31G** Level in the Gas Phase (cm <sup>-1</sup> )...S37                                                      |     |
| <b>Table S17.</b> Key Transitions and Their Related Rotatory and Oscillator Strengths of <b>1</b> at the B3LYP-SCRF//B3LYP/6-31G** Level with COSMO Model in MeOH.....        | S38 |
| <b>Table S18.</b> Key Transitions and Their Related Rotatory and Oscillator Strengths of L- <b>1a1</b> at the B3LYP/6-31G** Level in the Gas Phase.....                       | S39 |
| <b>Table S19.</b> Key Transitions and Their Related Rotatory and Oscillator Strengths of <b>2b1</b> at the B3LYP/6-31G** Level in the Gas Phase.....                          | S39 |
| <b>Table S20.</b> Key Transitions, Oscillator Strengths, and Rotatory Strengths of Conformer <b>3a1</b> of compound <b>3</b> at the B3LYP/6-31G** Level in the Gas Phase..... | S40 |
| <b>Table S21.</b> Key Transitions, Oscillator Strengths, and Rotatory Strengths of compound <b>4</b> at the B3LYP/6-31G** Level in the Gas Phase.....                         | S40 |

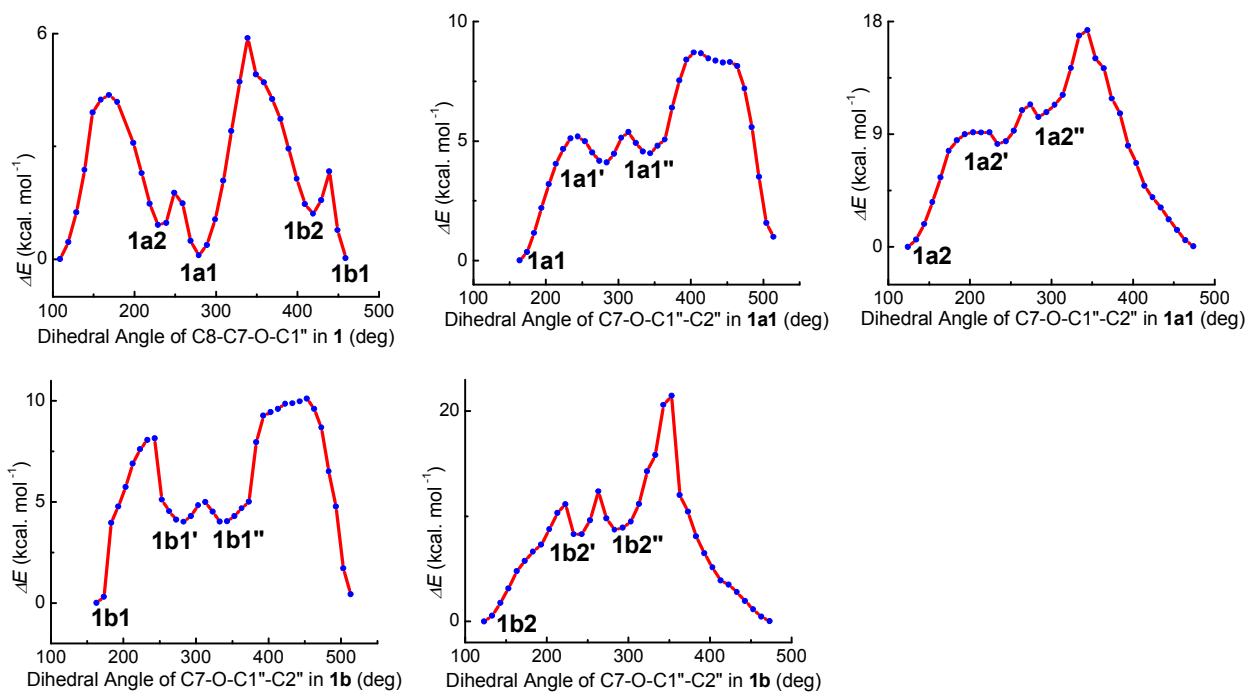

**Figure S1.** Potential energy surfaces of **1** at the B3LYP/6-31G\*\* level in the gas phase.

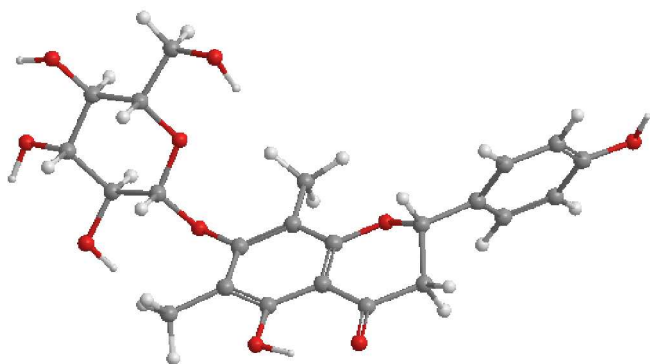

**Figure S2.** Optimized geometry of conformer of mattucinol-7-*O*- $\beta$ -L-glucopyranoside (L-**1a1**) at the B3LYP/6-31G\*\* level in the gas phase.

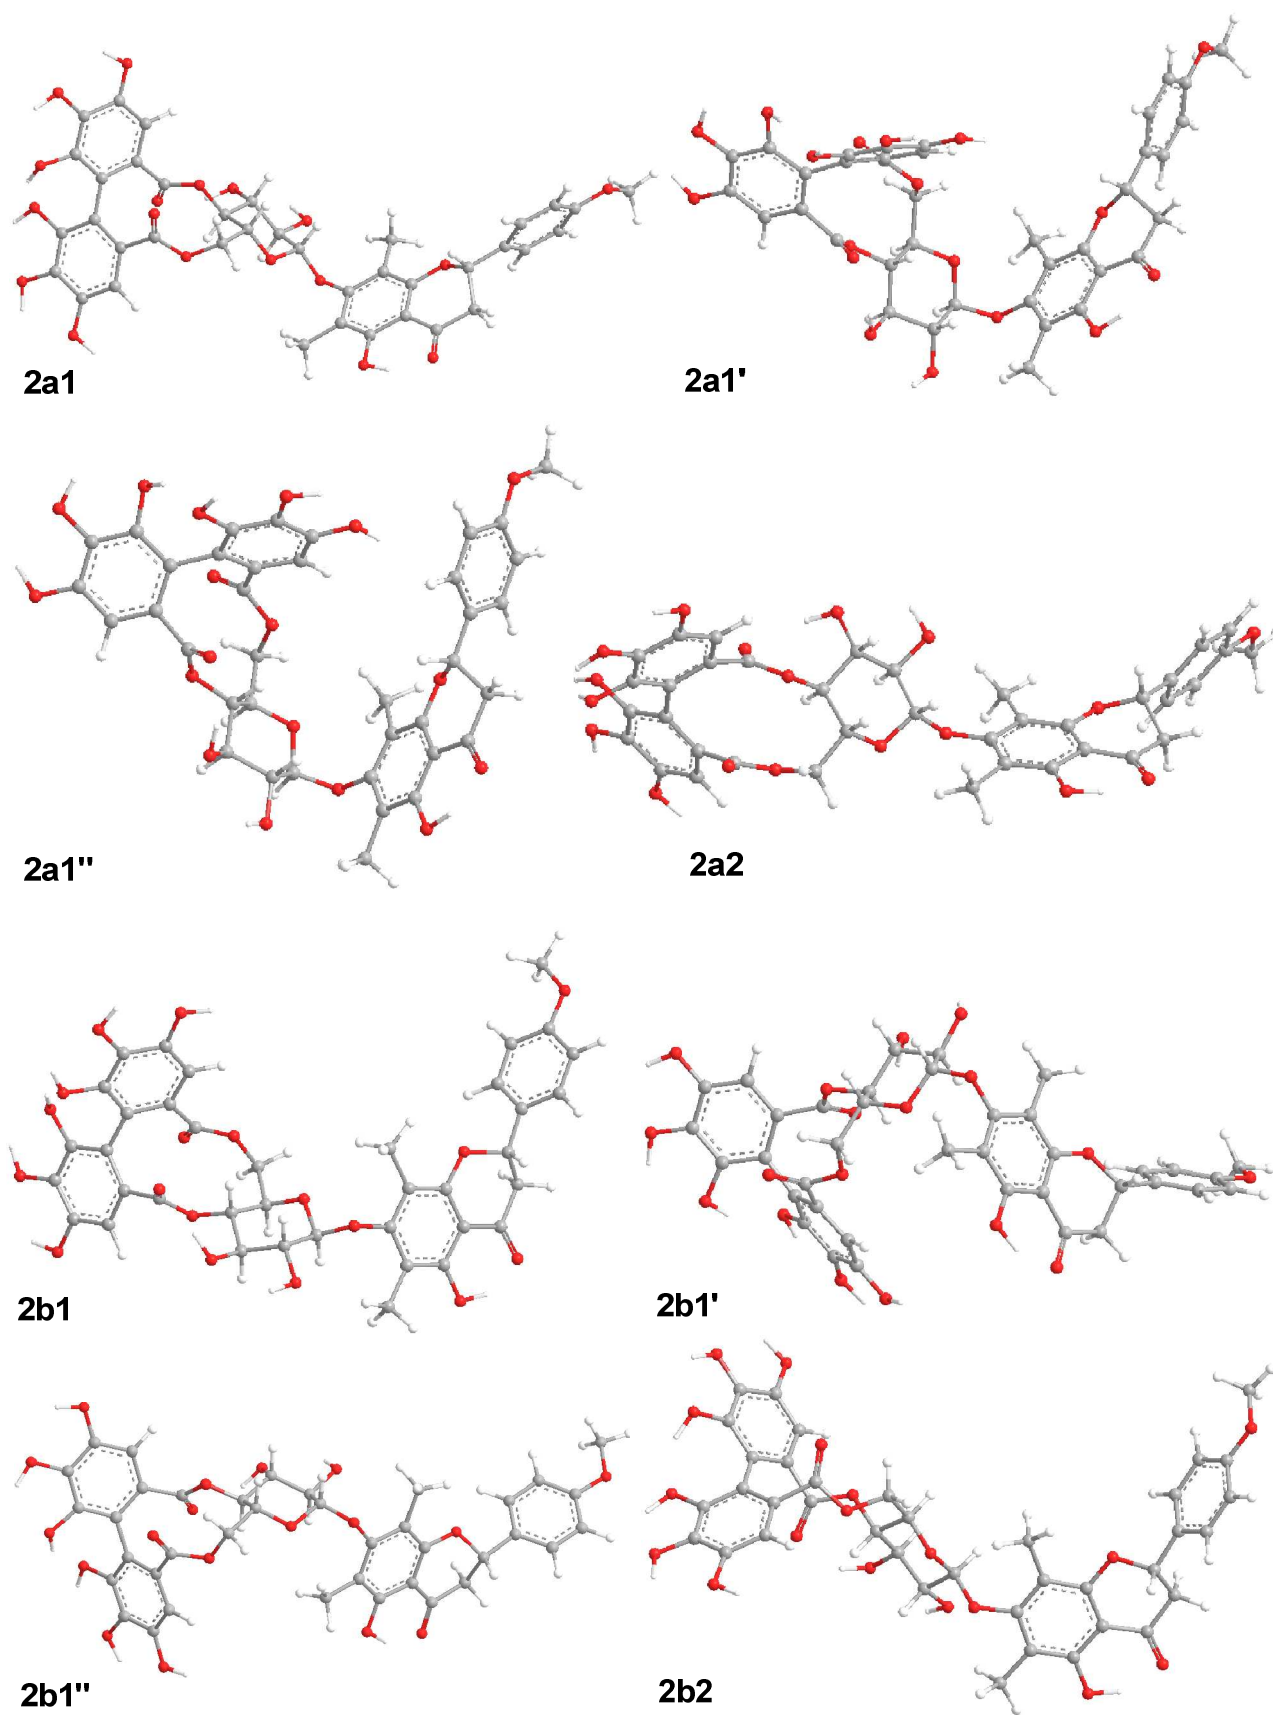

Figure S3. Optimized geometries of compound 2 at the B3LYP/6-31G\*\* level in the gas phase.

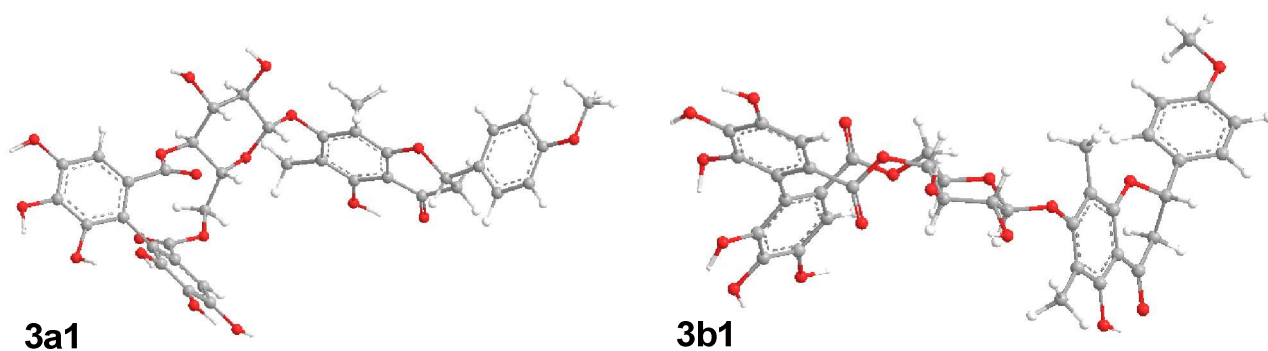

Figure S4. Optimized geometries of compound **3** at the B3LYP/6-31G\*\* level in the gas phase.

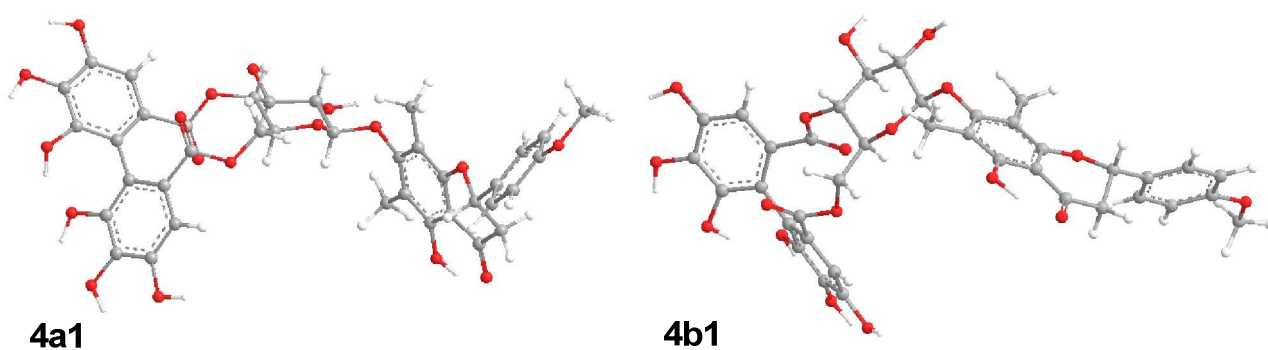

Figure S5. Optimized geometries of compound **4** at the B3LYP/6-31G\*\* level in the gas phase.

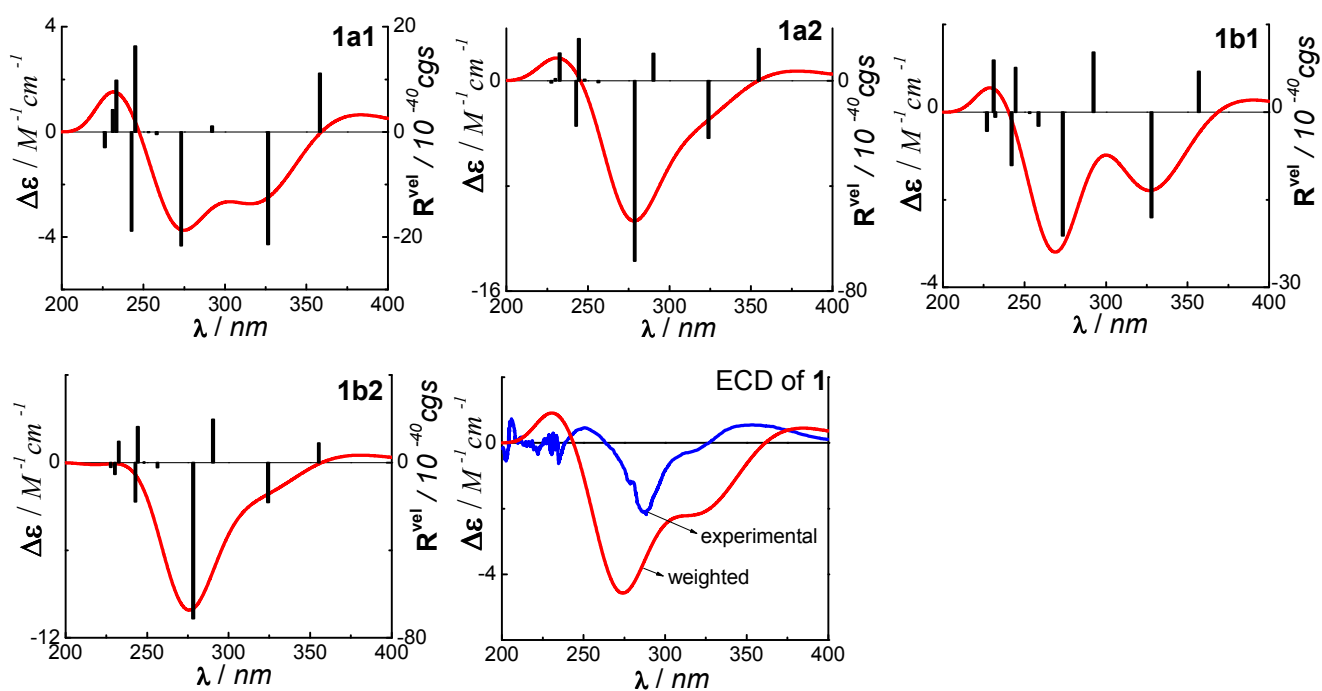

Figure S6. Experimental and calculated ECD of **1** at the B3LYP-SCRF/6-31G\*\*//B3LYP/6-31G\*\* level with COSMO model in MeOH ( $\sigma = 0.20\text{eV}$ ).

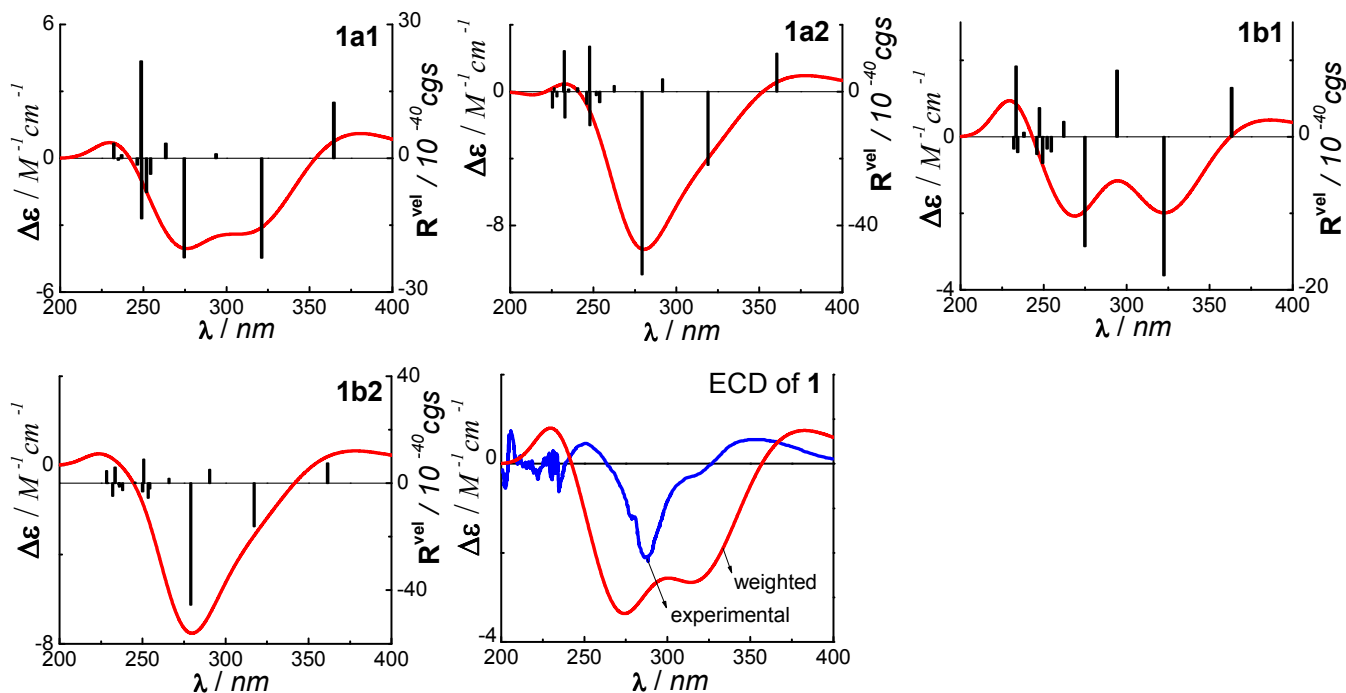

**Figure S7.** Experimental and calculated ECD of **1** at the B3LYP/6-311++G\*\*//B3LYP/6-31G\*\* level in the gas phase ( $\sigma = 0.20\text{eV}$ ).

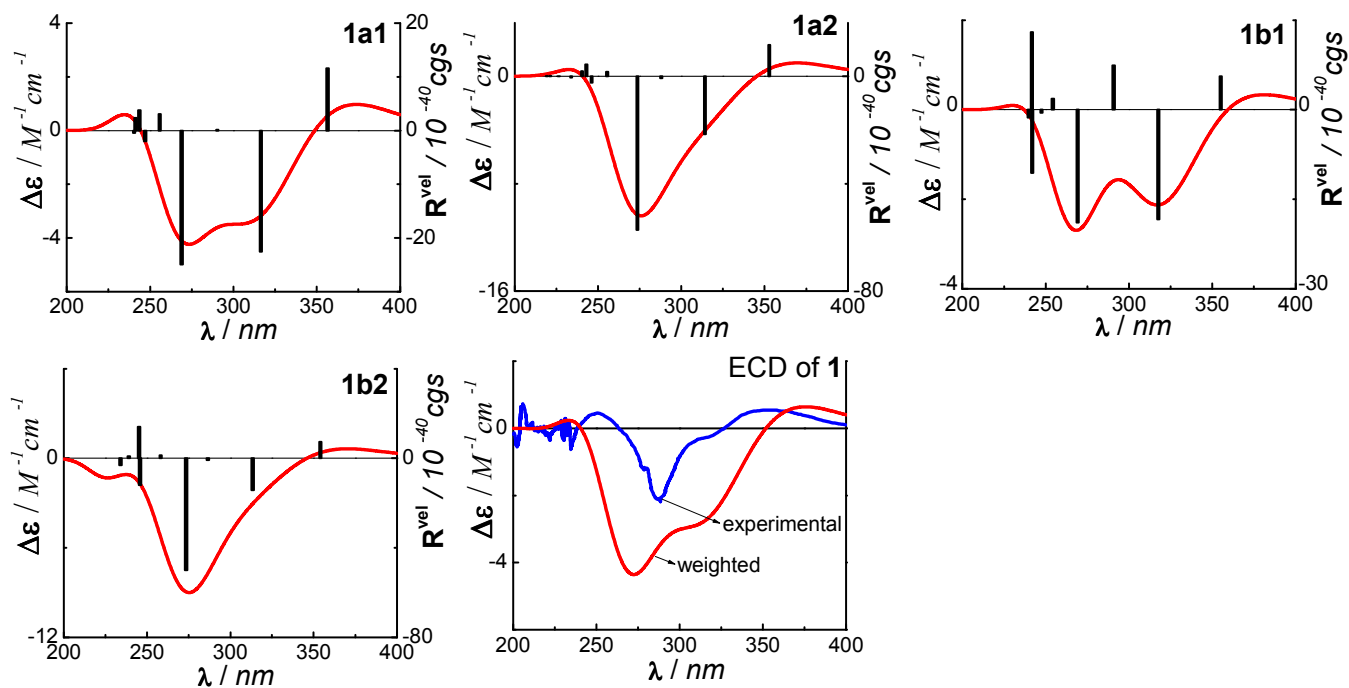

**Figure S8.** Experimental and calculated ECD of **1** at the B3PW91/6-31G\*\*//B3LYP/6-31G\*\* level in the gas phase ( $\sigma = 0.20\text{eV}$ ).

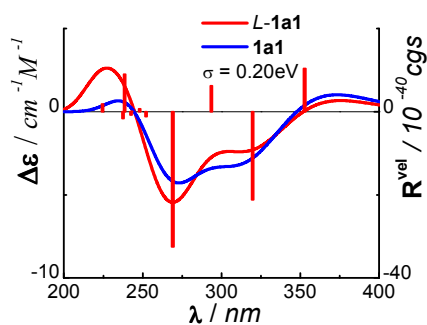

**Figure S9.** Calculated ECD of L-**1a1** and **1a1** at the B3LYP/6-31G\*\* level in the gas phase.

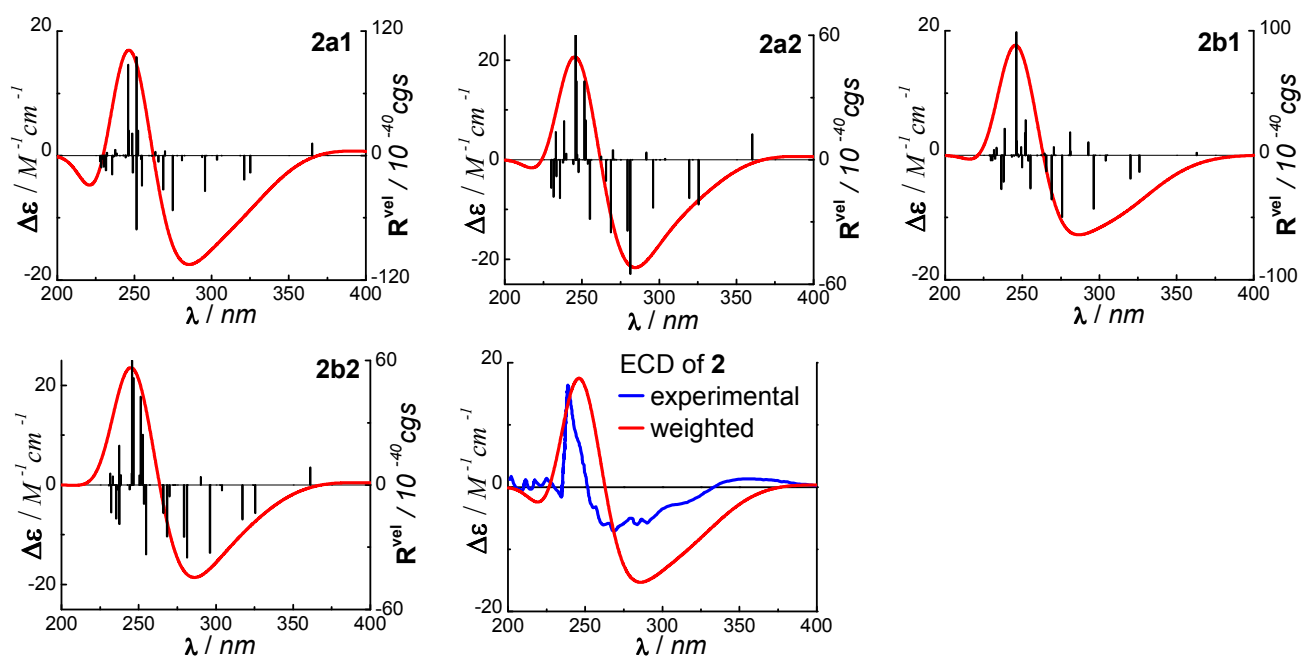

**Figure S10.** Experimental and calculated ECD of **2** at the B3LYP/6-311++G\*\*//B3LYP/6-31G\*\* level in the gas phase ( $\sigma = 0.20\text{eV}$ ).

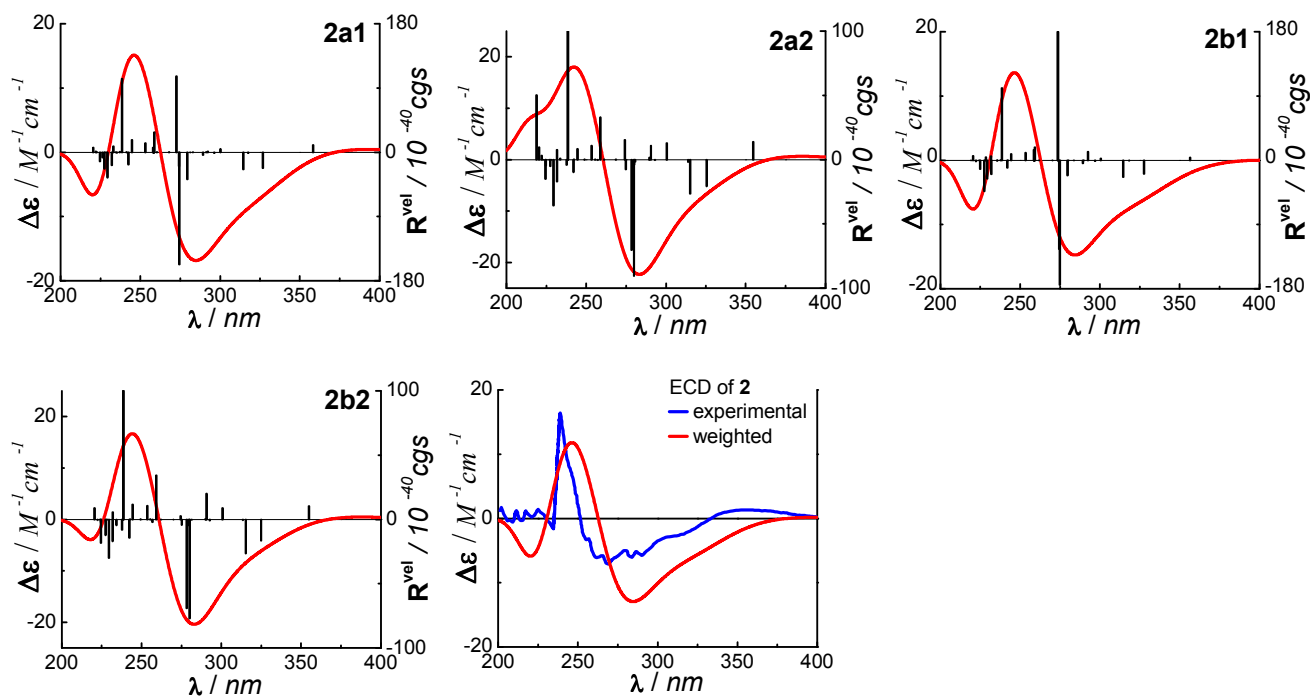

**Figure S11.** Experimental and calculated ECD of **2** at the B3LYP-SCRF/6-31G\*\*//B3LYP/6-31G\*\* level with COSMO model in MeOH ( $\sigma = 0.20\text{eV}$ ).

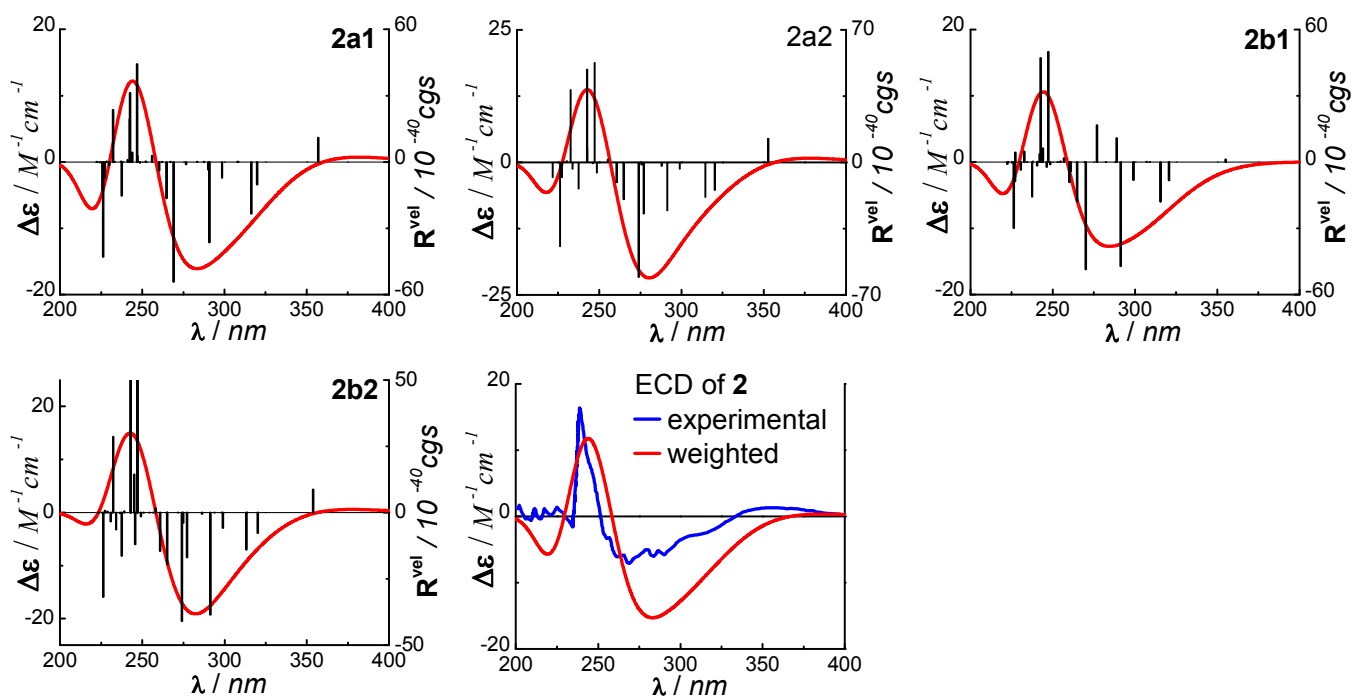

**Figure S12.** Experimental and calculated ECD of **2** at the B3PW91/6-31G\*\*//B3LYP/6-31G\*\* level in the gas phase ( $\sigma = 0.20\text{eV}$ ).



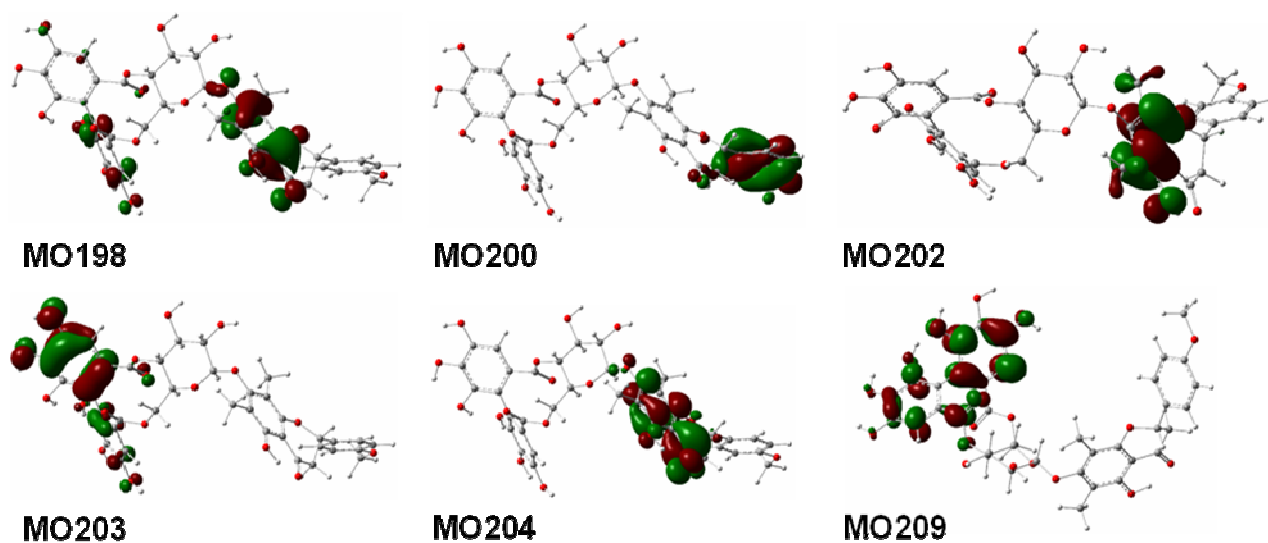

**Figure S13.** Molecular orbitals involved in key transitions in ECD spectrum of **4b1** at the B3LYP/6-31G\*\* level in the gas phase.

**Table S1.** Optimized Z-Matrixes of **1** in the Gas Phase (Å).

| <b>1a1</b> |           |           |           | <b>1a1'</b> |           |           |           |
|------------|-----------|-----------|-----------|-------------|-----------|-----------|-----------|
| O          | -2.266630 | 0.117788  | -0.244365 | O           | 1.905254  | 0.393543  | 0.398097  |
| C          | -3.254209 | 0.790310  | 0.567736  | C           | 2.789109  | 0.687960  | -0.705950 |
| C          | -3.481439 | 2.211438  | 0.041148  | C           | 2.948866  | 2.204885  | -0.853264 |
| C          | -2.174962 | 2.974403  | -0.049745 | C           | 1.600279  | 2.885436  | -0.980945 |
| C          | 0.262326  | 2.807576  | -0.548148 | C           | -0.783653 | 2.851431  | -0.252317 |
| C          | 1.393503  | 2.057523  | -0.901804 | C           | -1.839974 | 2.282433  | 0.478769  |
| C          | 1.233448  | 0.668901  | -1.004222 | C           | -1.589714 | 1.061075  | 1.123957  |
| C          | 0.012501  | -0.010135 | -0.806251 | C           | -0.325715 | 0.425102  | 1.139746  |
| C          | -1.083985 | 0.772423  | -0.442508 | C           | 0.689937  | 1.020186  | 0.393092  |
| C          | -0.990504 | 2.178960  | -0.311576 | C           | 0.490667  | 2.228859  | -0.316194 |
| C          | -4.507202 | -0.051366 | 0.579377  | C           | 4.094300  | -0.032355 | -0.469161 |
| C          | -4.992435 | -0.644929 | -0.588137 | C           | 4.689970  | -0.055359 | 0.793984  |
| C          | -6.177492 | -1.382595 | -0.587225 | C           | 5.920552  | -0.680229 | 1.003349  |
| C          | -6.903867 | -1.525697 | 0.601683  | C           | 6.580575  | -1.288849 | -0.071555 |
| C          | -6.425866 | -0.934414 | 1.779807  | C           | 5.991623  | -1.272253 | -1.343870 |
| C          | -5.239628 | -0.212563 | 1.763362  | C           | 4.761888  | -0.655238 | -1.532489 |
| O          | 2.340417  | -0.076929 | -1.391732 | O           | -2.599580 | 0.491623  | 1.892793  |
| C          | 3.032000  | -0.762202 | -0.387171 | C           | -3.439578 | -0.502507 | 1.346380  |
| C          | 3.925509  | -1.810946 | -1.052031 | C           | -4.563609 | 0.043098  | 0.453581  |
| C          | 4.856927  | -2.429116 | -0.010412 | C           | -5.337928 | -1.112820 | -0.178746 |
| C          | 5.627009  | -1.357495 | 0.748132  | C           | -4.404552 | -2.067938 | -0.906399 |

|              |           |           |           |            |           |           |           |
|--------------|-----------|-----------|-----------|------------|-----------|-----------|-----------|
| C            | 4.625775  | -0.372514 | 1.371285  | C          | -3.336762 | -2.558364 | 0.081770  |
| O            | 3.827189  | 0.186797  | 0.320860  | O          | -2.644182 | -1.422964 | 0.616950  |
| O            | -2.150946 | 4.211831  | 0.057760  | O          | 1.484656  | 3.962318  | -1.589514 |
| O            | 0.387742  | 4.140018  | -0.445955 | O          | -1.004126 | 4.018782  | -0.876339 |
| C            | 2.697715  | 2.761814  | -1.168610 | C          | -3.136651 | 3.044037  | 0.579384  |
| C            | -0.142529 | -1.500041 | -0.992244 | C          | -0.030974 | -0.808028 | 1.956988  |
| O            | -8.072393 | -2.219226 | 0.719318  | O          | 7.784840  | -1.923382 | 0.015145  |
| C            | -8.606355 | -2.840318 | -0.440164 | C          | 8.428423  | -1.976243 | 1.279323  |
| O            | 3.106840  | -2.804039 | -1.639990 | O          | -5.427143 | 0.823742  | 1.260241  |
| O            | 5.716123  | -3.323938 | -0.702298 | O          | -6.304541 | -0.536263 | -1.045203 |
| O            | 6.412464  | -2.031204 | 1.733167  | O          | -5.208767 | -3.137806 | -1.405767 |
| C            | 5.286841  | 0.808565  | 2.072799  | C          | -2.261161 | -3.426655 | -0.562616 |
| O            | 6.155731  | 1.522566  | 1.209065  | O          | -1.604758 | -2.753264 | -1.623352 |
| H            | -2.851455 | 0.856970  | 1.589567  | H          | 2.318522  | 0.296647  | -1.620462 |
| H            | -4.179039 | 2.760893  | 0.678410  | H          | 3.564946  | 2.454204  | -1.721050 |
| H            | -3.923148 | 2.162856  | -0.963347 | H          | 3.455589  | 2.607029  | 0.034374  |
| H            | -0.514114 | 4.492954  | -0.224339 | H          | -0.145229 | 4.278381  | -1.303059 |
| H            | 3.406381  | 2.089425  | -1.650300 | H          | -3.832377 | 2.566466  | 1.266659  |
| H            | 2.533984  | 3.635973  | -1.805202 | H          | -2.938618 | 4.065819  | 0.919301  |
| H            | 3.145978  | 3.127899  | -0.237354 | H          | -3.619966 | 3.138146  | -0.400344 |
| H            | -0.264307 | -2.017032 | -0.032477 | H          | 0.093306  | -1.695990 | 1.328378  |
| H            | -1.041828 | -1.717330 | -1.575542 | H          | 0.902032  | -0.678933 | 2.513266  |
| H            | 0.719077  | -1.927397 | -1.505231 | H          | -0.838718 | -1.002892 | 2.660976  |
| H            | -4.427653 | -0.548212 | -1.510000 | H          | 4.177833  | 0.403644  | 1.633722  |
| H            | -6.519444 | -1.838118 | -1.508716 | H          | 6.349353  | -0.688174 | 1.998178  |
| H            | -9.531835 | -3.322869 | -0.123264 | H          | 9.362177  | -2.516721 | 1.118803  |
| H            | -8.832437 | -2.107119 | -1.224702 | H          | 8.653965  | -0.972534 | 1.661371  |
| H            | -7.924213 | -3.599179 | -0.844011 | H          | 7.823173  | -2.514294 | 2.019924  |
| H            | -6.995971 | -1.063418 | 2.693629  | H          | 6.511899  | -1.756805 | -2.163150 |
| H            | -4.876036 | 0.231383  | 2.686902  | H          | 4.312606  | -0.659627 | -2.522568 |
| H            | 2.332721  | -1.244791 | 0.313989  | H          | -3.891201 | -0.988066 | 2.223694  |
| H            | 4.533233  | -1.292594 | -1.809670 | H          | -4.114095 | 0.639392  | -0.354026 |
| H            | 3.701516  | -3.523534 | -1.897669 | H          | -6.190334 | 1.038979  | 0.704063  |
| H            | 4.239261  | -2.984067 | 0.716445  | H          | -5.840164 | -1.674400 | 0.627623  |
| H            | 6.334556  | -3.667354 | -0.041317 | H          | -6.755043 | -1.276616 | -1.476784 |
| H            | 6.267066  | -0.804538 | 0.050267  | H          | -3.903428 | -1.540077 | -1.726697 |
| H            | 7.175178  | -1.475162 | 1.936558  | H          | -4.767042 | -3.507421 | -2.180606 |
| H            | 3.991798  | -0.911525 | 2.095017  | H          | -3.826255 | -3.126515 | 0.889713  |
| H            | 4.501788  | 1.456616  | 2.488108  | H          | -1.554329 | -3.749118 | 0.215488  |
| H            | 5.893683  | 0.441584  | 2.906643  | H          | -2.723965 | -4.323697 | -0.986314 |
| H            | 5.614474  | 1.812858  | 0.460471  | H          | -1.253375 | -1.933442 | -1.245783 |
| <b>1a1''</b> |           |           |           | <b>1a2</b> |           |           |           |
| O            | -1.798393 | 0.401373  | -0.313733 | O          | 2.446666  | 0.118189  | 0.201852  |
| C            | -2.827605 | 0.863732  | 0.587669  | C          | 3.487691  | 0.685061  | -0.622477 |
| C            | -3.203708 | 2.308138  | 0.244454  | C          | 3.638383  | 2.175883  | -0.304360 |

|   |           |           |           |   |           |           |           |
|---|-----------|-----------|-----------|---|-----------|-----------|-----------|
| C | -1.979332 | 3.201805  | 0.240401  | C | 2.313011  | 2.896920  | -0.450079 |
| C | 0.455843  | 3.344730  | -0.285580 | C | -0.158607 | 2.715635  | -0.209796 |
| C | 1.647119  | 2.756424  | -0.734145 | C | -1.313816 | 1.996484  | 0.139488  |
| C | 1.626029  | 1.378802  | -0.998108 | C | -1.141699 | 0.640174  | 0.457663  |
| C | 0.475260  | 0.567208  | -0.899182 | C | 0.108052  | -0.017905 | 0.492119  |
| C | -0.685131 | 1.187120  | -0.430645 | C | 1.229216  | 0.739556  | 0.163188  |
| C | -0.725782 | 2.567531  | -0.121708 | C | 1.124885  | 2.106907  | -0.197899 |
| C | -3.989724 | -0.096277 | 0.506721  | C | 4.750961  | -0.109220 | -0.394784 |
| C | -4.438180 | -0.589490 | -0.720633 | C | 5.138213  | -0.500653 | 0.888856  |
| C | -5.541201 | -1.441300 | -0.799852 | C | 6.329494  | -1.195079 | 1.105932  |
| C | -6.222392 | -1.803942 | 0.368877  | C | 7.161466  | -1.500305 | 0.021509  |
| C | -5.781369 | -1.314309 | 1.606560  | C | 6.782316  | -1.113199 | -1.271651 |
| C | -4.675827 | -0.476207 | 1.668341  | C | 5.588931  | -0.431420 | -1.471041 |
| O | 2.807696  | 0.849446  | -1.500465 | O | -2.208238 | -0.154954 | 0.837466  |
| C | 3.676999  | 0.034101  | -0.754269 | C | -3.331144 | -0.289318 | 0.004262  |
| C | 3.536344  | 0.106965  | 0.772446  | C | -3.504606 | -1.759717 | -0.392599 |
| C | 4.465044  | -0.922000 | 1.418612  | C | -4.845986 | -1.955811 | -1.094029 |
| C | 4.241009  | -2.316744 | 0.857052  | C | -5.987250 | -1.432559 | -0.235106 |
| C | 4.403677  | -2.262032 | -0.669075 | C | -5.715459 | 0.039955  | 0.110263  |
| O | 3.471513  | -1.309083 | -1.191807 | O | -4.448005 | 0.134182  | 0.776617  |
| O | -2.078623 | 4.413361  | 0.497731  | O | 2.276559  | 4.105915  | -0.739991 |
| O | 0.439202  | 4.660544  | -0.020438 | O | -0.289284 | 4.014555  | -0.521395 |
| C | 2.889419  | 3.582862  | -0.939802 | C | -2.628588 | 2.732566  | 0.217257  |
| C | 0.444788  | -0.882975 | -1.313974 | C | 0.206361  | -1.480138 | 0.847213  |
| O | -7.311260 | -2.624388 | 0.410601  | O | 8.346813  | -2.169232 | 0.116011  |
| C | -7.799343 | -3.157765 | -0.811074 | C | 8.782417  | -2.587501 | 1.400608  |
| O | 3.884413  | 1.406652  | 1.210098  | O | -2.437873 | -2.121266 | -1.251089 |
| O | 4.229092  | -0.860233 | 2.818406  | O | -4.972178 | -3.342881 | -1.373003 |
| O | 5.201321  | -3.172160 | 1.479195  | O | -7.187378 | -1.597210 | -0.992107 |
| C | 4.095296  | -3.584190 | -1.362177 | C | -6.735922 | 0.634509  | 1.074654  |
| O | 2.801074  | -4.069217 | -1.042739 | O | -6.819212 | -0.106237 | 2.280665  |
| H | -2.409705 | 0.844078  | 1.605395  | H | 3.176437  | 0.580642  | -1.672602 |
| H | -3.938533 | 2.703721  | 0.950301  | H | 4.379951  | 2.647329  | -0.954480 |
| H | -3.658334 | 2.340008  | -0.754887 | H | 3.986182  | 2.294885  | 0.730581  |
| H | -0.491243 | 4.885320  | 0.245620  | H | 0.630688  | 4.358996  | -0.683009 |
| H | 3.632371  | 3.356602  | -0.169751 | H | -3.331370 | 2.222851  | 0.876386  |
| H | 3.343803  | 3.360835  | -1.909698 | H | -2.457290 | 3.745020  | 0.590519  |
| H | 2.647475  | 4.644995  | -0.895529 | H | -3.100633 | 2.841688  | -0.767716 |
| H | 0.651370  | -1.557670 | -0.473399 | H | 1.230994  | -1.830899 | 0.723782  |
| H | -0.543833 | -1.142774 | -1.696978 | H | -0.095214 | -1.656629 | 1.885756  |
| H | 1.194638  | -1.070064 | -2.082932 | H | -0.456832 | -2.070946 | 0.209925  |
| H | -3.907958 | -0.321669 | -1.629075 | H | 4.491298  | -0.278890 | 1.731687  |
| H | -5.856102 | -1.813278 | -1.767355 | H | 6.594833  | -1.491927 | 2.113453  |
| H | -8.659339 | -3.774727 | -0.547345 | H | 9.737744  | -3.090518 | 1.245084  |
| H | -8.121248 | -2.365693 | -1.499017 | H | 8.929428  | -1.734933 | 2.075793  |
| H | -7.047024 | -3.781974 | -1.309758 | H | 8.075377  | -3.290270 | 1.859487  |

|            |           |           |           |             |           |           |           |
|------------|-----------|-----------|-----------|-------------|-----------|-----------|-----------|
| H          | -6.314940 | -1.612354 | 2.502792  | H           | 7.433702  | -1.366195 | -2.101382 |
| H          | -4.339031 | -0.113157 | 2.636313  | H           | 5.302803  | -0.147340 | -2.480802 |
| H          | 4.691858  | 0.351077  | -1.037968 | H           | -3.223907 | 0.330746  | -0.897320 |
| H          | 2.498677  | -0.140460 | 1.042619  | H           | -3.494681 | -2.354736 | 0.533134  |
| H          | 3.923413  | 1.362219  | 2.176747  | H           | -2.664657 | -2.993073 | -1.606839 |
| H          | 5.505250  | -0.628150 | 1.197109  | H           | -4.832723 | -1.380010 | -2.035407 |
| H          | 4.787091  | -1.544866 | 3.214959  | H           | -5.850288 | -3.459646 | -1.763748 |
| H          | 3.220627  | -2.646003 | 1.086414  | H           | -6.033539 | -2.004831 | 0.699134  |
| H          | 4.850003  | -4.071500 | 1.468348  | H           | -7.922984 | -1.678217 | -0.372030 |
| H          | 5.437713  | -1.963033 | -0.909917 | H           | -5.707487 | 0.632581  | -0.819175 |
| H          | 4.225509  | -3.453943 | -2.445995 | H           | -6.477926 | 1.687220  | 1.259743  |
| H          | 4.811178  | -4.341580 | -1.027258 | H           | -7.727733 | 0.609740  | 0.612198  |
| H          | 2.174649  | -3.389432 | -1.330005 | H           | -5.925054 | -0.116073 | 2.652510  |
| <b>1b1</b> |           |           |           | <b>1b1'</b> |           |           |           |
| O          | 2.137354  | 0.363107  | -0.320893 | O           | 1.961885  | 0.309455  | -0.500799 |
| C          | 3.373453  | 1.109521  | -0.287797 | C           | 3.109936  | 1.158436  | -0.286314 |
| C          | 3.390969  | 2.027133  | 0.939819  | C           | 2.860298  | 2.071724  | 0.919191  |
| C          | 2.167097  | 2.921622  | 0.964172  | C           | 1.583793  | 2.867297  | 0.732288  |
| C          | -0.261281 | 3.086653  | 0.420403  | C           | -0.732572 | 2.826819  | -0.196531 |
| C          | -1.447684 | 2.533493  | -0.087022 | C           | -1.776402 | 2.166268  | -0.859905 |
| C          | -1.368598 | 1.237076  | -0.615332 | C           | -1.529837 | 0.857769  | -1.312405 |
| C          | -0.176720 | 0.491550  | -0.726579 | C           | -0.268754 | 0.225995  | -1.236528 |
| C          | 0.982031  | 1.087200  | -0.230449 | C           | 0.747287  | 0.929353  | -0.586091 |
| C          | 0.966477  | 2.373271  | 0.362337  | C           | 0.538652  | 2.213924  | -0.032882 |
| C          | 4.518085  | 0.125395  | -0.318079 | C           | 4.327506  | 0.279478  | -0.129268 |
| C          | 4.465140  | -1.071757 | 0.398938  | C           | 4.267810  | -0.931717 | 0.562713  |
| C          | 5.543137  | -1.958947 | 0.407392  | C           | 5.408135  | -1.715708 | 0.749306  |
| C          | 6.706028  | -1.643901 | -0.306238 | C           | 6.639388  | -1.280176 | 0.244622  |
| C          | 6.770137  | -0.444250 | -1.029595 | C           | 6.710780  | -0.064841 | -0.451594 |
| C          | 5.685111  | 0.422220  | -1.035731 | C           | 5.565415  | 0.697543  | -0.637370 |
| O          | -2.516358 | 0.669998  | -1.155810 | O           | -2.552672 | 0.211507  | -1.997878 |
| C          | -3.449193 | 0.134706  | -0.262743 | C           | -3.512403 | -0.548521 | -1.294782 |
| C          | -4.779270 | -0.029866 | -0.999241 | C           | -3.033687 | -1.954261 | -0.901093 |
| C          | -5.759870 | -0.797248 | -0.113986 | C           | -4.099481 | -2.646227 | -0.052719 |
| C          | -5.162459 | -2.115003 | 0.359400  | C           | -4.487779 | -1.792062 | 1.143562  |
| C          | -3.829639 | -1.833111 | 1.070845  | C           | -4.960206 | -0.422566 | 0.634476  |
| O          | -2.964554 | -1.139086 | 0.162777  | O           | -3.908809 | 0.170665  | -0.138658 |
| O          | 2.206015  | 4.041611  | 1.500473  | O           | 1.452032  | 3.995216  | 1.235334  |
| O          | -0.312843 | 4.311743  | 0.965450  | O           | -0.963721 | 4.057478  | 0.290523  |
| C          | -2.715390 | 3.349571  | -0.067131 | C           | -3.072846 | 2.897963  | -1.093055 |
| C          | -0.130152 | -0.875806 | -1.358974 | C           | 0.039303  | -1.106618 | -1.872694 |
| O          | 7.817951  | -2.431734 | -0.366549 | O           | 7.815167  | -1.960623 | 0.369312  |
| C          | 7.809530  | -3.662034 | 0.341502  | C           | 7.804220  | -3.201839 | 1.057773  |
| O          | -5.291688 | 1.249864  | -1.315970 | O           | -2.799417 | -2.691900 | -2.086994 |
| O          | -6.945138 | -0.985796 | -0.873432 | O           | -3.567681 | -3.906146 | 0.332728  |

|              |           |           |           |            |           |           |           |
|--------------|-----------|-----------|-----------|------------|-----------|-----------|-----------|
| O            | -6.124518 | -2.716430 | 1.228177  | O          | -5.517771 | -2.494785 | 1.840612  |
| C            | -3.077088 | -3.094086 | 1.480691  | C          | -5.266249 | 0.569323  | 1.751458  |
| O            | -2.815677 | -3.938777 | 0.372046  | O          | -4.156407 | 0.761349  | 2.611745  |
| H            | 3.407157  | 1.735922  | -1.191759 | H          | 3.228255  | 1.787704  | -1.181206 |
| H            | 4.292004  | 2.645533  | 0.957211  | H          | 3.696438  | 2.757879  | 1.075377  |
| H            | 3.394264  | 1.415874  | 1.852332  | H          | 2.761903  | 1.458987  | 1.825404  |
| H            | 0.606323  | 4.520791  | 1.279452  | H          | -0.127124 | 4.345143  | 0.741280  |
| H            | -3.475328 | 2.924376  | -0.723033 | H          | -3.676884 | 2.385267  | -1.840785 |
| H            | -3.132578 | 3.422662  | 0.944868  | H          | -3.665976 | 2.981562  | -0.176252 |
| H            | -2.501905 | 4.373964  | -0.385312 | H          | -2.867559 | 3.917552  | -1.431798 |
| H            | 0.781108  | -0.992440 | -1.950500 | H          | 0.926354  | -1.020552 | -2.508060 |
| H            | -0.124352 | -1.666147 | -0.598561 | H          | 0.274858  | -1.868335 | -1.119644 |
| H            | -1.000294 | -1.032160 | -1.996278 | H          | -0.796467 | -1.465667 | -2.470332 |
| H            | 3.561315  | -1.327252 | 0.942486  | H          | 3.313865  | -1.279913 | 0.945000  |
| H            | 5.464478  | -2.883946 | 0.965826  | H          | 5.324333  | -2.655201 | 1.282252  |
| H            | 8.782438  | -4.120331 | 0.159345  | H          | 8.832361  | -3.565663 | 1.037914  |
| H            | 7.679998  | -3.507814 | 1.420278  | H          | 7.483701  | -3.083963 | 2.100732  |
| H            | 7.021059  | -4.333278 | -0.021853 | H          | 7.153094  | -3.933704 | 0.563105  |
| H            | 7.674663  | -0.220579 | -1.585028 | H          | 7.670663  | 0.252848  | -0.844590 |
| H            | 5.745389  | 1.343149  | -1.610659 | H          | 5.634272  | 1.631938  | -1.189201 |
| H            | -3.573693 | 0.787134  | 0.615354  | H          | -4.350817 | -0.646628 | -1.999626 |
| H            | -4.581123 | -0.618917 | -1.908143 | H          | -2.119632 | -1.857410 | -0.296818 |
| H            | -6.203011 | 1.108459  | -1.611475 | H          | -2.653033 | -3.607409 | -1.806687 |
| H            | -5.974730 | -0.180669 | 0.775607  | H          | -4.998378 | -2.790156 | -0.676410 |
| H            | -7.536761 | -1.515975 | -0.320072 | H          | -4.227153 | -4.307736 | 0.916953  |
| H            | -4.964593 | -2.757956 | -0.506623 | H          | -3.613405 | -1.640889 | 1.787742  |
| H            | -5.989124 | -3.672078 | 1.207315  | H          | -5.494687 | -2.217672 | 2.765193  |
| H            | -4.023152 | -1.220918 | 1.967358  | H          | -5.862021 | -0.560334 | 0.015465  |
| H            | -2.151105 | -2.800186 | 1.995938  | H          | -5.604262 | 1.514427  | 1.302973  |
| H            | -3.685527 | -3.667944 | 2.186975  | H          | -6.084811 | 0.179292  | 2.364910  |
| H            | -2.336355 | -3.395685 | -0.270823 | H          | -3.432609 | 1.086783  | 2.056766  |
| <b>1b1''</b> |           |           |           | <b>1b2</b> |           |           |           |
| O            | 2.288787  | 0.197128  | -0.428931 | O          | -2.146835 | 0.281625  | 0.220606  |
| C            | 3.378765  | 1.118006  | -0.214265 | C          | -3.432984 | 0.887298  | 0.480338  |
| C            | 3.141351  | 1.902354  | 1.081165  | C          | -3.612001 | 2.117287  | -0.415073 |
| C            | 1.793405  | 2.593499  | 1.051175  | C          | -2.461385 | 3.087762  | -0.233902 |
| C            | -0.568049 | 2.445461  | 0.272374  | C          | -0.016329 | 3.314177  | 0.212054  |
| C            | -1.605030 | 1.772414  | -0.395695 | C          | 1.242180  | 2.739834  | 0.437629  |
| C            | -1.282996 | 0.546801  | -0.998426 | C          | 1.301114  | 1.343816  | 0.563757  |
| C            | 0.023663  | 0.013576  | -1.063386 | C          | 0.174992  | 0.491127  | 0.527553  |
| C            | 1.026014  | 0.721358  | -0.403037 | C          | -1.055519 | 1.102815  | 0.281614  |
| C            | 0.753865  | 1.927757  | 0.289842  | C          | -1.181452 | 2.501788  | 0.110359  |
| C            | 4.666857  | 0.330497  | -0.207667 | C          | -4.495493 | -0.165586 | 0.278181  |
| C            | 4.750232  | -0.918782 | 0.410601  | C          | -4.442962 | -1.048671 | -0.802570 |
| C            | 5.955052  | -1.622448 | 0.461736  | C          | -5.448193 | -1.993322 | -1.016062 |

|   |           |           |           |   |           |           |           |
|---|-----------|-----------|-----------|---|-----------|-----------|-----------|
| C | 7.107332  | -1.066458 | -0.107327 | C | -6.538047 | -2.056276 | -0.138832 |
| C | 7.034793  | 0.187182  | -0.731435 | C | -6.601126 | -1.174884 | 0.949845  |
| C | 5.826308  | 0.869262  | -0.782354 | C | -5.587434 | -0.247540 | 1.153047  |
| O | -2.244078 | -0.156077 | -1.713257 | O | 2.563350  | 0.843913  | 0.833780  |
| C | -3.240812 | -0.939801 | -1.104559 | C | 3.121726  | -0.152430 | 0.016054  |
| C | -2.937329 | -1.440723 | 0.314754  | C | 4.400550  | 0.374850  | -0.645176 |
| C | -4.160417 | -2.172905 | 0.868236  | C | 5.141366  | -0.767952 | -1.335040 |
| C | -5.413028 | -1.315260 | 0.788258  | C | 5.399329  | -1.910460 | -0.364048 |
| C | -5.610616 | -0.876187 | -0.669501 | C | 4.060146  | -2.359960 | 0.241053  |
| O | -4.440260 | -0.167618 | -1.092115 | O | 3.439572  | -1.236005 | 0.880928  |
| O | 1.606631  | 3.654170  | 1.671746  | O | -2.627889 | 4.307658  | -0.404688 |
| O | -0.855798 | 3.597064  | 0.899769  | O | -0.109587 | 4.644453  | 0.060687  |
| C | -2.965754 | 2.416636  | -0.468108 | C | 2.485274  | 3.588421  | 0.515926  |
| C | 0.321832  | -1.246056 | -1.835129 | C | 0.234865  | -0.990546 | 0.809303  |
| O | 8.335449  | -1.660718 | -0.113720 | O | -7.576153 | -2.934028 | -0.251912 |
| C | 8.468848  | -2.935859 | 0.495242  | C | -7.566157 | -3.851668 | -1.334818 |
| O | -1.831010 | -2.323089 | 0.274029  | O | 4.040225  | 1.370913  | -1.584809 |
| O | -3.843844 | -2.543046 | 2.202971  | O | 6.343568  | -0.226699 | -1.863165 |
| O | -6.493704 | -2.114698 | 1.271916  | O | 6.034203  | -2.953256 | -1.105685 |
| C | -6.783357 | 0.078054  | -0.864416 | C | 4.209449  | -3.423343 | 1.323537  |
| O | -6.697894 | 1.216537  | -0.023001 | O | 5.061973  | -2.996645 | 2.372660  |
| H | 3.388586  | 1.826965  | -1.055761 | H | -3.440009 | 1.215423  | 1.530427  |
| H | 3.926373  | 2.644859  | 1.245269  | H | -4.553353 | 2.629148  | -0.199475 |
| H | 3.158913  | 1.209216  | 1.932947  | H | -3.642205 | 1.802803  | -1.466978 |
| H | -0.010132 | 3.906894  | 1.321785  | H | -1.063352 | 4.841604  | -0.137257 |
| H | -3.508930 | 2.064215  | -1.344660 | H | 2.958419  | 3.506492  | 1.500532  |
| H | -3.571572 | 2.194920  | 0.419941  | H | 3.217030  | 3.258756  | -0.226649 |
| H | -2.854955 | 3.502409  | -0.512767 | H | 2.237682  | 4.635016  | 0.338389  |
| H | -0.212927 | -1.245217 | -2.788594 | H | -0.669235 | -1.302328 | 1.336643  |
| H | 1.392273  | -1.328862 | -2.026056 | H | 0.281192  | -1.588863 | -0.110113 |
| H | -0.006728 | -2.128406 | -1.278488 | H | 1.107045  | -1.240574 | 1.413859  |
| H | 3.857274  | -1.359951 | 0.841457  | H | -3.594187 | -1.014428 | -1.478222 |
| H | 5.982173  | -2.593858 | 0.940481  | H | -5.370697 | -2.668720 | -1.859537 |
| H | 9.515715  | -3.218092 | 0.375761  | H | -8.475518 | -4.445540 | -1.233843 |
| H | 8.224508  | -2.901874 | 1.564630  | H | -7.578238 | -3.335634 | -2.303265 |
| H | 7.834898  | -3.686522 | 0.006422  | H | -6.694599 | -4.517367 | -1.294171 |
| H | 7.934686  | 0.598530  | -1.176143 | H | -7.447556 | -1.243189 | 1.624871  |
| H | 5.782991  | 1.835488  | -1.279175 | H | -5.645043 | 0.422010  | 2.007787  |
| H | -3.376477 | -1.804081 | -1.771685 | H | 2.406667  | -0.468912 | -0.757277 |
| H | -2.730269 | -0.571802 | 0.957235  | H | 5.038931  | 0.785353  | 0.151668  |
| H | -1.782610 | -2.727091 | 1.152996  | H | 4.844432  | 1.570797  | -2.086022 |
| H | -4.325184 | -3.075515 | 0.255246  | H | 4.506363  | -1.149377 | -2.153021 |
| H | -4.643471 | -2.952853 | 2.563714  | H | 6.828803  | -0.971692 | -2.246386 |
| H | -5.284731 | -0.418814 | 1.406420  | H | 6.046615  | -1.559391 | 0.448424  |
| H | -7.174924 | -1.519937 | 1.610428  | H | 6.568100  | -3.473333 | -0.491941 |
| H | -5.768466 | -1.769200 | -1.297541 | H | 3.414638  | -2.750794 | -0.562767 |

|   |           |           |           |   |          |           |          |
|---|-----------|-----------|-----------|---|----------|-----------|----------|
| H | -6.837869 | 0.358071  | -1.926079 | H | 3.210325 | -3.693930 | 1.694676 |
| H | -7.712988 | -0.439063 | -0.606105 | H | 4.658930 | -4.321601 | 0.888451 |
| H | -5.875967 | 1.672078  | -0.255398 | H | 4.677947 | -2.176373 | 2.715607 |

**Table S2.** Optimized Z-Matrixes of **2** in the Gas Phase (Å).

| <b>2a1</b> |           |           |           | <b>2a1'</b> |           |           |           |
|------------|-----------|-----------|-----------|-------------|-----------|-----------|-----------|
| O          | -6.154178 | -0.203048 | 0.117016  | O           | -4.832707 | 0.254865  | -0.363040 |
| C          | -7.034207 | -0.216591 | -1.027777 | C           | -5.284426 | -0.727861 | 0.591074  |
| C          | -7.463158 | -1.655087 | -1.335200 | C           | -6.054525 | -0.041135 | 1.724262  |
| C          | -6.254944 | -2.552073 | -1.518456 | C           | -5.223687 | 1.056321  | 2.359816  |
| C          | -3.928498 | -3.030648 | -0.759147 | C           | -3.546922 | 2.852389  | 1.939684  |
| C          | -2.814749 | -2.741201 | 0.043365  | C           | -2.703976 | 3.571884  | 1.076940  |
| C          | -2.884964 | -1.591737 | 0.841854  | C           | -2.583855 | 3.102706  | -0.240882 |
| C          | -4.001263 | -0.729552 | 0.902569  | C           | -3.315806 | 2.007687  | -0.755305 |
| C          | -5.076345 | -1.041988 | 0.070559  | C           | -4.137178 | 1.322203  | 0.136410  |
| C          | -5.072103 | -2.186999 | -0.762186 | C           | -4.271031 | 1.716668  | 1.489384  |
| C          | -8.192286 | 0.709123  | -0.743499 | C           | -6.102551 | -1.761260 | -0.145673 |
| C          | -8.812225 | 0.733406  | 0.507683  | C           | -7.000893 | -1.394686 | -1.150040 |
| C          | -9.910828 | 1.558293  | 0.755651  | C           | -7.793908 | -2.345824 | -1.794576 |
| C          | 10.411748 | 2.372241  | -0.267892 | C           | -7.699285 | -3.693339 | -1.425403 |
| C          | -9.797964 | 2.354754  | -1.528573 | C           | -6.800338 | -4.072846 | -0.418244 |
| C          | -8.699672 | 1.535881  | -1.755257 | C           | -6.011830 | -3.115087 | 0.205627  |
| O          | -1.805474 | -1.321911 | 1.675222  | O           | -1.798564 | 3.816350  | -1.139448 |
| C          | -0.927399 | -0.310836 | 1.275970  | C           | -0.455216 | 3.456301  | -1.373287 |
| C          | -0.104643 | 0.133702  | 2.485607  | C           | 0.538895  | 3.985002  | -0.330460 |
| C          | 0.983059  | 1.128580  | 2.042542  | C           | 1.963089  | 3.498753  | -0.656590 |
| C          | 1.798390  | 0.510942  | 0.916867  | C           | 1.950771  | 1.986308  | -0.795118 |
| C          | 0.877683  | 0.089241  | -0.237716 | C           | 0.923909  | 1.563018  | -1.854655 |
| O          | -0.055970 | -0.856588 | 0.282076  | O           | -0.356802 | 2.038683  | -1.438538 |
| O          | -6.309894 | -3.555314 | -2.249223 | O           | -5.395773 | 1.378054  | 3.547908  |
| O          | -3.890880 | -4.133234 | -1.523981 | O           | -3.671596 | 3.281609  | 3.205721  |
| C          | -1.632696 | -3.674262 | 0.027561  | C           | -2.040972 | 4.821909  | 1.595557  |
| C          | -4.075601 | 0.461966  | 1.826627  | C           | -3.263553 | 1.588939  | -2.202418 |
| O          | 11.477222 | 3.214272  | -0.140180 | O           | -8.425375 | -4.704503 | -1.982644 |
| C          | 12.130303 | 3.287857  | 1.118149  | C           | -9.351950 | -4.381206 | -3.008801 |
| O          | -0.949781 | 0.738165  | 3.441476  | O           | 0.511259  | 5.397943  | -0.343951 |
| O          | 1.757444  | 1.511312  | 3.169399  | O           | 2.861945  | 3.980255  | 0.331084  |
| O          | 2.794687  | 1.413248  | 0.389848  | O           | 3.233131  | 1.447288  | -1.180988 |
| C          | 1.627873  | -0.551930 | -1.414786 | C           | 0.849555  | 0.041783  | -2.050166 |
| O          | 2.840851  | -1.187655 | -0.962136 | O           | 1.216837  | -0.646267 | -0.837501 |
| C          | 4.016771  | -0.655111 | -1.419664 | C           | 2.347283  | -1.418860 | -0.894449 |
| O          | 4.090693  | 0.126304  | -2.338661 | C           | 2.806410  | -1.797201 | 0.478809  |
| C          | 5.179141  | -1.177768 | -0.635087 | C           | 1.835908  | -2.224252 | 1.394586  |

|   |           |           |           |   |           |           |           |
|---|-----------|-----------|-----------|---|-----------|-----------|-----------|
| C | 6.242427  | -0.321743 | -0.255870 | C | 2.216779  | -2.708054 | 2.639838  |
| C | 7.354357  | -0.930776 | 0.343365  | C | 3.570946  | -2.768345 | 2.968066  |
| O | 8.441948  | -0.165919 | 0.698396  | C | 4.529607  | -2.303618 | 2.067770  |
| C | 7.406637  | -2.302942 | 0.588193  | C | 4.183947  | -1.788779 | 0.810131  |
| O | 8.539583  | -2.792098 | 1.178711  | C | 5.225047  | -1.204398 | -0.083553 |
| C | 6.320964  | -3.113645 | 0.257577  | C | 6.341890  | -1.954768 | -0.484782 |
| O | 6.474218  | -4.441809 | 0.564308  | C | 7.240817  | -1.464161 | -1.434924 |
| C | 5.208644  | -2.550171 | -0.354616 | C | 7.052078  | -0.209232 | -2.019883 |
| C | 6.182063  | 1.160142  | -0.413199 | C | 5.970986  | 0.569072  | -1.613727 |
| C | 7.182739  | 1.857122  | -1.109205 | C | 5.091308  | 0.089929  | -0.640354 |
| O | 8.326390  | 1.278277  | -1.606500 | C | 4.012647  | 0.998810  | -0.159654 |
| C | 7.058147  | 3.221033  | -1.384271 | O | 2.886476  | -1.747259 | -1.924967 |
| O | 8.031591  | 3.896819  | -2.063304 | O | 1.364337  | -3.170800 | 3.609898  |
| C | 5.927753  | 3.934344  | -0.977048 | O | 4.018031  | -3.247190 | 4.168792  |
| O | 5.811367  | 5.261074  | -1.251039 | O | 5.853184  | -2.367095 | 2.438750  |
| C | 4.936574  | 3.273543  | -0.255670 | O | 6.630582  | -3.218845 | -0.027698 |
| C | 5.077702  | 1.916945  | 0.045349  | O | 8.325753  | -2.195804 | -1.825523 |
| C | 4.044639  | 1.278180  | 0.908783  | O | 7.928510  | 0.260355  | -2.947071 |
| O | 4.266407  | 0.680833  | 1.946720  | O | 3.812794  | 1.302554  | 1.002400  |
| H | -6.464897 | 0.168098  | -1.887282 | H | -4.391847 | -1.209312 | 1.019406  |
| H | -8.087135 | -1.698351 | -2.231545 | H | -6.353758 | -0.760726 | 2.490710  |
| H | -8.060184 | -2.044152 | -0.499424 | H | -6.971938 | 0.408972  | 1.321603  |
| H | -4.766814 | -4.183603 | -1.989844 | H | -4.328384 | 2.680074  | 3.645199  |
| H | -0.860753 | -3.337856 | 0.716513  | H | -1.532161 | 5.367217  | 0.802914  |
| H | -1.943606 | -4.689066 | 0.298087  | H | -2.790513 | 5.472611  | 2.057366  |
| H | -1.200634 | -3.737358 | -0.977038 | H | -1.314103 | 4.589493  | 2.383147  |
| H | -3.983900 | 1.407370  | 1.277778  | H | -2.704562 | 0.656270  | -2.332122 |
| H | -5.046709 | 0.490624  | 2.328657  | H | -4.272876 | 1.413367  | -2.585503 |
| H | -3.291685 | 0.427476  | 2.583199  | H | -2.785252 | 2.358221  | -2.807180 |
| H | -8.420578 | 0.115152  | 1.309110  | H | -7.070078 | -0.353721 | -1.448739 |
| H | 10.361345 | 1.560056  | 1.740828  | H | -8.473106 | -2.028215 | -2.576470 |
| H | 12.934074 | 4.015316  | 0.997471  | H | -9.816208 | -5.323615 | -3.302143 |
| H | 12.560107 | 2.320888  | 1.409081  | H | 10.127928 | -3.692657 | -2.651183 |
| H | 11.449686 | 3.629878  | 1.908097  | H | -8.853037 | -3.938282 | -3.880025 |
| H | 10.192924 | 2.998469  | -2.307282 | H | -6.732971 | -5.122033 | -0.150968 |
| H | -8.226579 | 1.542080  | -2.734266 | H | -5.312468 | -3.425570 | 0.978355  |
| H | -1.476321 | 0.543024  | 0.847181  | H | -0.218397 | 3.906505  | -2.349265 |
| H | 0.382193  | -0.767210 | 2.892506  | H | 0.252407  | 3.582056  | 0.653113  |
| H | -0.357942 | 1.154605  | 4.086798  | H | 1.255860  | 5.677699  | 0.210843  |
| H | 0.483130  | 2.036630  | 1.675587  | H | 2.265862  | 3.950402  | -1.612183 |
| H | 2.615933  | 1.056594  | 3.119127  | H | 3.094697  | 3.241215  | 0.919025  |
| H | 2.308016  | -0.382824 | 1.283501  | H | 1.661863  | 1.531657  | 0.155261  |
| H | 0.336525  | 0.970009  | -0.621144 | H | 1.183410  | 2.016969  | -2.825010 |
| H | 0.990983  | -1.318389 | -1.861713 | H | -0.176673 | -0.235444 | -2.300966 |
| H | 1.889133  | 0.196629  | -2.162803 | H | 1.523251  | -0.277779 | -2.845333 |
| H | 4.365372  | -3.171503 | -0.638164 | H | 0.787660  | -2.193487 | 1.115702  |



|              |           |           |           |            |           |           |           |
|--------------|-----------|-----------|-----------|------------|-----------|-----------|-----------|
| H            | 5.672822  | -4.929292 | 0.334929  | H          | 0.447903  | -3.040577 | 3.335153  |
| H            | 8.412151  | -3.738639 | 1.342408  | H          | 3.247545  | -3.465017 | 4.714662  |
| H            | 9.079652  | -0.746339 | 1.144451  | H          | 5.889604  | -2.693501 | 3.352370  |
| H            | 8.696482  | 0.709277  | -0.904913 | H          | 6.521248  | -3.212939 | 0.942334  |
| H            | 8.729491  | 3.248750  | -2.256363 | H          | 8.296877  | -3.021454 | -1.313814 |
| H            | 6.596358  | 5.526186  | -1.754416 | H          | 8.600884  | -0.423744 | -3.087969 |
| H            | 4.073597  | 3.832254  | 0.086818  | H          | 5.841180  | 1.555145  | -2.043826 |
| <b>2a1''</b> |           |           |           | <b>2a2</b> |           |           |           |
| O            | -3.995211 | 0.190082  | 0.486322  | O          | 6.509407  | 0.123426  | -0.133855 |
| C            | -4.241679 | 1.036953  | -0.655680 | C          | 7.648758  | -0.684796 | 0.227509  |
| C            | -5.536592 | 0.594342  | -1.342353 | C          | 8.036166  | -1.582781 | -0.952184 |
| C            | -5.459427 | -0.876877 | -1.717236 | C          | 6.851947  | -2.406630 | -1.416912 |
| C            | -4.498209 | -3.103108 | -1.116620 | C          | 4.379226  | -2.467790 | -1.699643 |
| C            | -3.692478 | -3.913965 | -0.300922 | C          | 3.112438  | -1.867722 | -1.606043 |
| C            | -2.992319 | -3.287271 | 0.744154  | C          | 3.049818  | -0.618802 | -0.968310 |
| C            | -3.149608 | -1.922637 | 1.085555  | C          | 4.173119  | 0.078581  | -0.469950 |
| C            | -3.911693 | -1.150081 | 0.211984  | C          | 5.411948  | -0.542887 | -0.605119 |
| C            | -4.594119 | -1.703370 | -0.896029 | C          | 5.543986  | -1.819084 | -1.209352 |
| C            | -4.229508 | 2.467103  | -0.174819 | C          | 8.760476  | 0.237211  | 0.667554  |
| C            | -4.938346 | 2.856754  | 0.963979  | C          | 9.010731  | 1.440548  | 0.004653  |
| C            | -4.924749 | 4.178969  | 1.411567  | C          | 10.071382 | 2.267210  | 0.380226  |
| C            | -4.191463 | 5.143650  | 0.708630  | C          | 10.909724 | 1.883889  | 1.434164  |
| C            | -3.474147 | 4.765504  | -0.437161 | C          | 10.667251 | 0.677962  | 2.107328  |
| C            | -3.496595 | 3.442089  | -0.867037 | C          | 9.601935  | -0.127776 | 1.727439  |
| O            | -2.165631 | -4.092392 | 1.522843  | O          | 1.855090  | 0.066709  | -0.837697 |
| C            | -0.766309 | -4.046340 | 1.337204  | C          | 0.757259  | -0.534760 | -0.201951 |
| C            | -0.298439 | -4.104953 | -0.126292 | C          | 0.332144  | 0.298439  | 1.010893  |
| C            | 1.213856  | -3.834723 | -0.251964 | C          | -0.980513 | -0.242837 | 1.601985  |
| C            | 1.526722  | -2.526920 | 0.450324  | C          | -2.024428 | -0.310892 | 0.499956  |
| C            | 1.110032  | -2.627770 | 1.921854  | C          | -1.503001 | -1.147036 | -0.678307 |
| O            | -0.296655 | -2.850516 | 1.954534  | O          | -0.302581 | -0.536345 | -1.155114 |
| O            | -6.127430 | -1.325778 | -2.662779 | O          | 7.022706  | -3.507626 | -1.969966 |
| O            | -5.173657 | -3.684140 | -2.120574 | O          | 4.472437  | -3.663291 | -2.302516 |
| C            | -3.663380 | -5.398858 | -0.555401 | C          | 1.935574  | -2.558110 | -2.249906 |
| C            | -2.611756 | -1.286902 | 2.344574  | C          | 4.020540  | 1.423442  | 0.194586  |
| O            | -4.105315 | 6.457912  | 1.052807  | O          | 11.975155 | 2.609009  | 1.882619  |
| C            | -4.809857 | 6.903379  | 2.204353  | C          | 12.268677 | 3.839756  | 1.239644  |
| O            | -0.590600 | -5.382555 | -0.652313 | O          | 1.351416  | 0.252574  | 1.989493  |
| O            | 1.574559  | -3.857392 | -1.624572 | O          | -1.362831 | 0.559635  | 2.709284  |
| O            | 2.918209  | -2.149205 | 0.389494  | O          | -3.266462 | -0.900330 | 0.941865  |
| C            | 1.415496  | -1.354976 | 2.718070  | C          | -2.500881 | -1.241545 | -1.843049 |
| O            | 1.263285  | -0.197145 | 1.870498  | O          | -3.373454 | -0.093399 | -1.864422 |
| C            | 2.384681  | 0.566848  | 1.680528  | C          | -4.702808 | -0.333310 | -1.635889 |
| O            | 3.367415  | 0.498411  | 2.380985  | C          | -5.436959 | 0.943171  | -1.367756 |
| C            | 2.227622  | 1.478017  | 0.503953  | C          | -5.161628 | 2.037397  | -2.198331 |

|   |           |           |           |   |           |           |           |
|---|-----------|-----------|-----------|---|-----------|-----------|-----------|
| C | 3.306095  | 1.677520  | -0.393589 | C | -5.901224 | 3.207228  | -2.079608 |
| C | 3.129734  | 2.662869  | -1.374975 | C | -6.919243 | 3.282197  | -1.129237 |
| O | 4.155033  | 2.946893  | -2.248351 | C | -7.161733 | 2.203765  | -0.278605 |
| C | 1.943854  | 3.386454  | -1.492393 | C | -6.424800 | 1.013098  | -0.354679 |
| O | 1.877137  | 4.325235  | -2.485429 | C | -6.645322 | -0.080714 | 0.634890  |
| C | 0.872632  | 3.125904  | -0.636303 | C | -7.915709 | -0.651135 | 0.814923  |
| O | -0.242386 | 3.886647  | -0.871513 | C | -8.098721 | -1.769563 | 1.631646  |
| C | 1.016964  | 2.171708  | 0.364460  | C | -7.018066 | -2.359217 | 2.292772  |
| C | 4.550347  | 0.854264  | -0.360313 | C | -5.753274 | -1.792226 | 2.157266  |
| C | 5.813274  | 1.456895  | -0.248717 | C | -5.578016 | -0.655079 | 1.365338  |
| O | 6.026779  | 2.814994  | -0.268473 | C | -4.229053 | -0.022824 | 1.333231  |
| C | 6.968243  | 0.692282  | -0.067172 | O | -5.202260 | -1.433511 | -1.657558 |
| O | 8.195683  | 1.281022  | 0.042623  | O | -5.738798 | 4.333520  | -2.845653 |
| C | 6.900476  | -0.701053 | 0.013607  | O | -7.696661 | 4.396102  | -0.967499 |
| O | 8.028183  | -1.438958 | 0.194538  | O | -8.167479 | 2.324895  | 0.652975  |
| C | 5.664198  | -1.325814 | -0.130184 | O | -9.059328 | -0.205530 | 0.195653  |
| C | 4.515094  | -0.560928 | -0.344138 | O | -9.334799 | -2.323889 | 1.804093  |
| C | 3.233257  | -1.273192 | -0.604639 | O | -7.202270 | -3.449830 | 3.083322  |
| O | 2.515541  | -1.093593 | -1.572024 | O | -3.990043 | 1.141740  | 1.598028  |
| H | -3.411432 | 0.892357  | -1.363552 | H | 7.350140  | -1.325021 | 1.071134  |
| H | -5.736628 | 1.183533  | -2.241352 | H | 8.859823  | -2.251120 | -0.688014 |
| H | -6.385108 | 0.736074  | -0.659773 | H | 8.376109  | -0.958549 | -1.789472 |
| H | -5.689087 | -2.965396 | -2.569725 | H | 5.440355  | -3.895493 | -2.319044 |
| H | -4.686112 | -5.790638 | -0.557637 | H | 1.144022  | -1.848791 | -2.491279 |
| H | -3.231306 | -5.628352 | -1.533404 | H | 2.262545  | -3.056336 | -3.165590 |
| H | -3.077429 | -5.914961 | 0.201481  | H | 1.511336  | -3.340394 | -1.607175 |
| H | -1.732928 | -0.664911 | 2.150989  | H | 3.272806  | 1.372150  | 0.990009  |
| H | -3.379365 | -0.643784 | 2.784666  | H | 4.972836  | 1.747740  | 0.614368  |
| H | -2.325226 | -2.049764 | 3.065790  | H | 3.684616  | 2.182047  | -0.521505 |
| H | -5.491798 | 2.112679  | 1.528089  | H | 8.356816  | 1.748717  | -0.804769 |
| H | -5.480339 | 4.442614  | 2.303269  | H | 10.230449 | 3.198851  | -0.149382 |
| H | -4.604096 | 7.971106  | 2.286373  | H | 13.145809 | 4.242753  | 1.747730  |
| H | -5.891071 | 6.750552  | 2.099845  | H | 12.501954 | 3.696140  | 0.176938  |
| H | -4.460072 | 6.397234  | 3.112671  | H | 11.439723 | 4.553094  | 1.331203  |
| H | -2.913407 | 5.523955  | -0.973376 | H | 11.320350 | 0.400990  | 2.928024  |
| H | -2.935200 | 3.164765  | -1.756045 | H | 9.420209  | -1.054927 | 2.265532  |
| H | -0.389335 | -4.926144 | 1.877260  | H | 1.001926  | -1.560834 | 0.110801  |
| H | -0.824351 | -3.313286 | -0.682707 | H | 0.164405  | 1.326337  | 0.652574  |
| H | -0.155646 | -5.409893 | -1.518617 | H | 0.966869  | 0.652693  | 2.784702  |
| H | 1.756748  | -4.658757 | 0.231654  | H | -0.789942 | -1.254864 | 1.987798  |
| H | 1.649344  | -2.937066 | -1.931625 | H | -2.120669 | 1.108263  | 2.442479  |
| H | 0.941820  | -1.723900 | -0.003199 | H | -2.236564 | 0.695884  | 0.133153  |
| H | 1.634648  | -3.466735 | 2.408628  | H | -1.282573 | -2.171122 | -0.335405 |
| H | 0.709684  | -1.271002 | 3.547383  | H | -1.945326 | -1.260108 | -2.783167 |
| H | 2.435670  | -1.372691 | 3.101841  | H | -3.113427 | -2.139016 | -1.756592 |
| H | 0.203356  | 1.975072  | 1.054705  | H | -4.381371 | 1.956519  | -2.948210 |

|            |           |           |           |             |           |           |           |
|------------|-----------|-----------|-----------|-------------|-----------|-----------|-----------|
| H          | -0.965794 | 3.664039  | -0.267549 | H           | -4.998877 | 4.215549  | -3.454774 |
| H          | 0.990535  | 4.716358  | -2.468434 | H           | -7.381958 | 5.077803  | -1.580046 |
| H          | 3.831265  | 3.609913  | -2.879236 | H           | -8.521988 | 3.226586  | 0.591187  |
| H          | 5.506187  | 3.182973  | -1.007700 | H           | -9.077936 | 0.766980  | 0.278151  |
| H          | 8.048332  | 2.237707  | -0.043275 | H           | -9.951115 | -1.785381 | 1.280167  |
| H          | 8.772599  | -0.822483 | 0.269689  | H           | -8.141847 | -3.685471 | 3.043926  |
| H          | 5.614588  | -2.407928 | -0.101189 | H           | -4.919780 | -2.230803 | 2.693092  |
| <b>2b1</b> |           |           |           | <b>2b1'</b> |           |           |           |
| O          | -5.550780 | 0.095770  | -0.125660 | O           | -5.021027 | -0.477251 | -0.168996 |
| C          | -6.982040 | 0.049670  | 0.058080  | C           | -6.124407 | 0.010176  | 0.622908  |
| C          | -7.315260 | -0.842250 | 1.258820  | C           | -5.598398 | 0.602306  | 1.935562  |
| C          | -6.703070 | -2.218920 | 1.092690  | C           | -4.754874 | -0.412663 | 2.682044  |
| C          | -4.775560 | -3.513860 | 0.190740  | C           | -3.145198 | -2.305072 | 2.444369  |
| C          | -3.545110 | -3.581440 | -0.483760 | C           | -2.374315 | -3.166901 | 1.651854  |
| C          | -3.024700 | -2.374450 | -0.967230 | C           | -2.474682 | -3.025201 | 0.257089  |
| C          | -3.679160 | -1.127260 | -0.886900 | C           | -3.387916 | -2.154168 | -0.379036 |
| C          | -4.908580 | -1.107600 | -0.231630 | C           | -4.150753 | -1.330292 | 0.449841  |
| C          | -5.469620 | -2.282110 | 0.332430  | C           | -4.031536 | -1.361647 | 1.858909  |
| C          | -7.483540 | 1.466160  | 0.201320  | C           | -6.904544 | 1.000177  | -0.208762 |
| C          | -6.793490 | 2.405770  | 0.970470  | C           | -6.265199 | 1.883032  | -1.081061 |
| C          | -7.280620 | 3.703480  | 1.137480  | C           | -6.987002 | 2.830878  | -1.809563 |
| C          | -8.488160 | 4.073690  | 0.532650  | C           | -8.376765 | 2.909739  | -1.659629 |
| C          | -9.189770 | 3.138310  | -0.241180 | C           | -9.029266 | 2.027337  | -0.786445 |
| C          | -8.686050 | 1.854630  | -0.405000 | C           | -8.297876 | 1.084031  | -0.077280 |
| O          | -1.825640 | -2.387810 | -1.668510 | O           | -1.734370 | -3.897505 | -0.534460 |
| C          | -0.648630 | -2.556840 | -0.936240 | C           | -0.416348 | -3.573694 | -0.919229 |
| C          | 0.464330  | -2.984460 | -1.893080 | C           | -0.318490 | -2.560002 | -2.068623 |
| C          | 1.816430  | -3.013610 | -1.157380 | C           | 1.150674  | -2.196047 | -2.353786 |
| C          | 2.042170  | -1.670620 | -0.480430 | C           | 1.813919  | -1.753593 | -1.061599 |
| C          | 0.867340  | -1.339970 | 0.452140  | C           | 1.677649  | -2.856067 | -0.003044 |
| O          | -0.314500 | -1.295450 | -0.346650 | O           | 0.283551  | -3.075161 | 0.213693  |
| O          | -7.233340 | -3.217060 | 1.609750  | O           | -4.680679 | -0.393679 | 3.922555  |
| O          | -5.283920 | -4.646370 | 0.699120  | O           | -3.022105 | -2.385300 | 3.780396  |
| C          | -2.879270 | -4.919730 | -0.682970 | C           | -1.518914 | -4.206465 | 2.326510  |
| C          | -3.079130 | 0.109580  | -1.507150 | C           | -3.620759 | -2.127991 | -1.868973 |
| O          | -9.058400 | 5.309480  | 0.628030  | O           | -9.180481 | 3.795900  | -2.315244 |
| C          | -8.390230 | 6.302010  | 1.391520  | C           | -8.576973 | 4.712283  | -3.215753 |
| O          | 0.172070  | -4.262540 | -2.417040 | O           | -0.891062 | -3.129431 | -3.229411 |
| O          | 2.840810  | -3.376740 | -2.070460 | O           | 1.199459  | -1.225174 | -3.388871 |
| O          | 3.258360  | -1.632180 | 0.297510  | O           | 3.216888  | -1.455402 | -1.223869 |
| C          | 1.028570  | 0.002010  | 1.179120  | C           | 2.338382  | -2.498703 | 1.335643  |
| O          | 1.811790  | 0.918380  | 0.387150  | O           | 2.334512  | -1.071631 | 1.538905  |
| C          | 3.012780  | 1.308270  | 0.918150  | C           | 3.558916  | -0.459475 | 1.587331  |
| O          | 3.323690  | 1.142340  | 2.074200  | O           | 4.603935  | -1.052267 | 1.717562  |
| C          | 3.867400  | 1.964450  | -0.120510 | C           | 3.415921  | 1.025012  | 1.464398  |

|   |           |           |           |   |           |           |           |
|---|-----------|-----------|-----------|---|-----------|-----------|-----------|
| C | 5.257400  | 1.699710  | -0.188960 | C | 4.321131  | 1.779128  | 0.677722  |
| C | 5.998690  | 2.471480  | -1.095310 | C | 4.197291  | 3.174389  | 0.745102  |
| O | 7.361170  | 2.298970  | -1.182060 | O | 5.071897  | 3.971678  | 0.042288  |
| C | 5.402400  | 3.428250  | -1.916580 | C | 3.216307  | 3.795929  | 1.517694  |
| O | 6.219630  | 4.123470  | -2.765200 | O | 3.185737  | 5.163693  | 1.511215  |
| C | 4.022660  | 3.626690  | -1.870130 | C | 2.301246  | 3.027077  | 2.236688  |
| O | 3.543330  | 4.576060  | -2.736690 | O | 1.368082  | 3.744098  | 2.941157  |
| C | 3.256800  | 2.895170  | -0.971270 | C | 2.402277  | 1.642035  | 2.209373  |
| C | 5.912910  | 0.618590  | 0.602260  | C | 5.320530  | 1.147432  | -0.231609 |
| C | 7.007060  | 0.894220  | 1.437950  | C | 6.686530  | 1.458254  | -0.135898 |
| O | 7.626480  | 2.118620  | 1.523290  | O | 7.205927  | 2.416815  | 0.701485  |
| C | 7.528690  | -0.079450 | 2.292960  | C | 7.641642  | 0.764335  | -0.882738 |
| O | 8.591510  | 0.190270  | 3.107200  | O | 8.969900  | 1.067572  | -0.788088 |
| C | 6.972310  | -1.360240 | 2.345250  | C | 7.265300  | -0.267172 | -1.746876 |
| O | 7.482380  | -2.301910 | 3.182790  | O | 8.200283  | -0.940641 | -2.468533 |
| C | 5.908580  | -1.669220 | 1.501090  | C | 5.913523  | -0.572645 | -1.884836 |
| C | 5.408790  | -0.703730 | 0.624240  | C | 4.957649  | 0.143890  | -1.161249 |
| C | 4.342860  | -1.108830 | -0.335280 | C | 3.518877  | -0.143651 | -1.421995 |
| O | 4.399060  | -0.976340 | -1.544730 | O | 2.685411  | 0.680715  | -1.752265 |
| H | -7.420280 | -0.401300 | -0.844800 | H | -6.767044 | -0.850333 | 0.862855  |
| H | -8.395630 | -0.940670 | 1.392180  | H | -6.419308 | 0.933653  | 2.576554  |
| H | -6.910670 | -0.388350 | 2.173450  | H | -4.977213 | 1.480850  | 1.714572  |
| H | -6.136180 | -4.397630 | 1.146690  | H | -3.618196 | -1.688801 | 4.160825  |
| H | -2.122590 | -4.877510 | -1.467270 | H | -1.182026 | -4.955645 | 1.611295  |
| H | -2.403530 | -5.278810 | 0.238240  | H | -0.636206 | -3.758294 | 2.794371  |
| H | -3.629360 | -5.668470 | -0.952120 | H | -2.087146 | -4.696744 | 3.122516  |
| H | -2.812710 | -0.073230 | -2.552600 | H | -4.689807 | -2.227525 | -2.081281 |
| H | -3.785530 | 0.938600  | -1.462420 | H | -3.308021 | -1.173688 | -2.309833 |
| H | -2.157570 | 0.398320  | -0.993590 | H | -3.077151 | -2.925694 | -2.370795 |
| H | -5.850170 | 2.128440  | 1.430070  | H | -5.190054 | 1.817500  | -1.211361 |
| H | -6.715400 | 4.410310  | 1.732930  | H | -6.460490 | 3.492985  | -2.486373 |
| H | -9.012110 | 7.196220  | 1.332170  | H | -9.389890 | 5.318537  | -3.617526 |
| H | -8.287020 | 6.004030  | 2.442650  | H | -7.857270 | 5.365779  | -2.706483 |
| H | -7.396490 | 6.526270  | 0.983270  | H | -8.070578 | 4.195739  | -4.040997 |
| H | 10.118750 | 3.444690  | -0.710060 | H | 10.107670 | 2.094747  | -0.690196 |
| H | -9.235210 | 1.143550  | -1.017300 | H | -8.819179 | 0.399259  | 0.587346  |
| H | -0.780660 | -3.303200 | -0.137470 | H | 0.012223  | -4.531095 | -1.251123 |
| H | 0.512140  | -2.225170 | -2.690330 | H | -0.846453 | -1.643450 | -1.762554 |
| H | 0.980710  | -4.552150 | -2.866740 | H | -0.679249 | -2.517922 | -3.951462 |
| H | 1.772350  | -3.804580 | -0.394860 | H | 1.656002  | -3.095248 | -2.734319 |
| H | 3.348220  | -2.577230 | -2.293140 | H | 1.401277  | -0.362878 | -2.986498 |
| H | 2.098800  | -0.885300 | -1.237620 | H | 1.316975  | -0.858712 | -0.680334 |
| H | 0.766200  | -2.126980 | 1.217800  | H | 2.141642  | -3.785862 | -0.370907 |
| H | 0.040970  | 0.442760  | 1.332890  | H | 1.770979  | -2.959130 | 2.147274  |
| H | 1.525760  | -0.135310 | 2.139410  | H | 3.370546  | -2.848558 | 1.361358  |
| H | 2.185140  | 3.053880  | -0.908180 | H | 1.710832  | 1.030462  | 2.779886  |

|              |           |           |           |            |           |           |           |
|--------------|-----------|-----------|-----------|------------|-----------|-----------|-----------|
| H            | 2.581080  | 4.625640  | -2.673420 | H          | 0.767660  | 3.144162  | 3.401897  |
| H            | 5.667540  | 4.700250  | -3.314280 | H          | 2.431520  | 5.452661  | 2.046615  |
| H            | 7.688170  | 2.872840  | -1.893580 | H          | 4.799688  | 4.894711  | 0.170397  |
| H            | 7.768780  | 2.439360  | 0.612420  | H          | 6.650856  | 3.215082  | 0.614196  |
| H            | 8.843120  | 1.112380  | 2.932140  | H          | 9.037941  | 1.802230  | -0.155672 |
| H            | 8.207760  | -1.891640 | 3.678140  | H          | 9.068481  | -0.578996 | -2.233328 |
| H            | 5.496250  | -2.671140 | 1.518770  | H          | 5.618156  | -1.351977 | -2.577391 |
| <b>2b1''</b> |           |           |           | <b>2b2</b> |           |           |           |
| O            | -6.055819 | -0.034320 | 0.326279  | O          | 5.902550  | 0.018621  | 0.294271  |
| C            | -7.109705 | 0.926531  | 0.112904  | C          | 7.314252  | -0.122773 | 0.566653  |
| C            | -6.638659 | 1.991546  | -0.883694 | C          | 7.976814  | -0.922945 | -0.559138 |
| C            | -5.349288 | 2.634337  | -0.413237 | C          | 7.285022  | -2.258473 | -0.748625 |
| C            | -3.203240 | 2.278377  | 0.801140  | C          | 5.102117  | -3.466137 | -0.682720 |
| C            | -2.310039 | 1.458331  | 1.512001  | C          | 3.712637  | -3.467786 | -0.498957 |
| C            | -2.708179 | 0.131004  | 1.731431  | C          | 3.117658  | -2.272782 | -0.067706 |
| C            | -3.971922 | -0.390587 | 1.376040  | C          | 3.830862  | -1.092566 | 0.241382  |
| C            | -4.837394 | 0.463948  | 0.697633  | C          | 5.209184  | -1.128318 | 0.023793  |
| C            | -4.470177 | 1.795862  | 0.378281  | C          | 5.868374  | -2.289589 | -0.445014 |
| C            | -8.341662 | 0.182297  | -0.343695 | C          | 7.898222  | 1.257342  | 0.748513  |
| C            | -8.252722 | -0.903621 | -1.216917 | C          | 7.530765  | 2.316296  | -0.084570 |
| C            | -9.397057 | -1.559176 | -1.675686 | C          | 8.107548  | 3.580119  | 0.053091  |
| C            | 10.660706 | -1.118486 | -1.264257 | C          | 9.080709  | 3.794728  | 1.036974  |
| C            | 10.761601 | -0.028629 | -0.387591 | C          | 9.457015  | 2.738884  | 1.879415  |
| C            | -9.613229 | 0.605793  | 0.067186  | C          | 8.865834  | 1.490568  | 1.735440  |
| O            | -1.905675 | -0.732799 | 2.465833  | O          | 1.751439  | -2.351770 | 0.137560  |
| C            | -0.753694 | -1.347291 | 1.947553  | C          | 0.887985  | -1.445484 | -0.498748 |
| C            | -0.667678 | -1.460526 | 0.420522  | C          | -0.063922 | -2.192968 | -1.438394 |
| C            | 0.683663  | -2.076703 | 0.008241  | C          | -1.142439 | -1.241736 | -1.982658 |
| C            | 1.812899  | -1.282061 | 0.641433  | C          | -1.834319 | -0.566939 | -0.810332 |
| C            | 1.628870  | -1.232475 | 2.164172  | C          | -0.804170 | 0.143876  | 0.079317  |
| O            | 0.373308  | -0.609046 | 2.425224  | O          | 0.131547  | -0.831576 | 0.541474  |
| O            | -5.073124 | 3.806840  | -0.721861 | O          | 7.913457  | -3.245274 | -1.168793 |
| O            | -2.832576 | 3.540629  | 0.528591  | O          | 5.704712  | -4.583148 | -1.119135 |
| C            | -1.023566 | 2.048717  | 2.029632  | C          | 2.888569  | -4.697890 | -0.780129 |
| C            | -4.364433 | -1.799977 | 1.737257  | C          | 3.195987  | 0.135077  | 0.848211  |
| O            | 11.843252 | -1.679739 | -1.649374 | O          | 9.711753  | 4.983650  | 1.259085  |
| C            | 11.804275 | -2.792430 | -2.529773 | C          | 9.369569  | 6.090224  | 0.438505  |
| O            | -1.716560 | -2.276387 | -0.060056 | O          | 0.677177  | -2.739218 | -2.510752 |
| O            | 0.746918  | -2.140201 | -1.408289 | O          | -2.021561 | -1.962955 | -2.832837 |
| O            | 3.117503  | -1.835464 | 0.363241  | O          | -2.810354 | 0.413693  | -1.223331 |
| C            | 2.730735  | -0.441301 | 2.882196  | C          | -1.432876 | 0.835352  | 1.298792  |
| O            | 3.256604  | 0.587732  | 2.019593  | O          | -2.653380 | 0.173614  | 1.688973  |
| C            | 4.572411  | 0.465635  | 1.657741  | C          | -3.806424 | 0.905094  | 1.576781  |
| C            | 4.895131  | 1.365929  | 0.506894  | C          | -5.010839 | 0.023512  | 1.685763  |
| C            | 4.393750  | 2.673811  | 0.543267  | C          | -5.015088 | -0.949769 | 2.693499  |

|   |           |           |           |   |           |           |           |
|---|-----------|-----------|-----------|---|-----------|-----------|-----------|
| C | 4.762936  | 3.589874  | -0.433559 | C | -6.154759 | -1.709681 | 2.924895  |
| C | 5.639080  | 3.198267  | -1.445829 | C | -7.292926 | -1.493724 | 2.148148  |
| C | 6.103249  | 1.884016  | -1.498870 | C | -7.268741 | -0.551835 | 1.119633  |
| C | 5.736142  | 0.924571  | -0.544588 | C | -6.131837 | 0.220614  | 0.842187  |
| C | 6.165054  | -0.496222 | -0.692908 | C | -6.107496 | 1.142726  | -0.329734 |
| C | 7.523122  | -0.838539 | -0.790602 | C | -7.067331 | 2.156940  | -0.475911 |
| C | 7.936324  | -2.172987 | -0.780963 | C | -6.963472 | 3.111781  | -1.490383 |
| C | 7.007016  | -3.210580 | -0.669951 | C | -5.895262 | 3.087842  | -2.390991 |
| C | 5.651094  | -2.898705 | -0.607647 | C | -4.948331 | 2.071854  | -2.288191 |
| C | 5.238366  | -1.565075 | -0.649188 | C | -5.070978 | 1.100017  | -1.292506 |
| C | 3.776160  | -1.281767 | -0.690582 | C | -4.096039 | -0.026719 | -1.286500 |
| O | 5.355647  | -0.272778 | 2.207295  | O | -3.831199 | 2.102856  | 1.417501  |
| O | 4.355007  | 4.897765  | -0.494267 | O | -6.286186 | -2.674699 | 3.890741  |
| O | 6.056031  | 4.051476  | -2.430138 | O | -8.453899 | -2.193912 | 2.329797  |
| O | 6.953749  | 1.536050  | -2.523287 | O | -8.408880 | -0.381309 | 0.368199  |
| O | 8.548213  | 0.074579  | -0.864204 | O | -8.145698 | 2.328689  | 0.359284  |
| O | 9.257997  | -2.504092 | -0.873897 | O | -7.896722 | 4.098842  | -1.630016 |
| O | 7.416173  | -4.507220 | -0.657783 | O | -5.798432 | 4.021947  | -3.374106 |
| O | 3.213230  | -0.616089 | -1.541377 | O | -4.386191 | -1.209275 | -1.310598 |
| H | -7.316347 | 1.416769  | 1.076274  | H | 7.417173  | -0.688652 | 1.504621  |
| H | -7.397322 | 2.765229  | -1.026960 | H | 9.037172  | -1.090256 | -0.353825 |
| H | -6.459052 | 1.521218  | -1.859822 | H | 7.907958  | -0.357542 | -1.498145 |
| H | -3.580532 | 3.947498  | 0.014075  | H | 6.666748  | -4.360814 | -1.232586 |
| H | -0.683763 | 1.517199  | 2.917482  | H | 2.391929  | -5.056861 | 0.128003  |
| H | -0.214778 | 1.996400  | 1.291257  | H | 2.108214  | -4.472118 | -1.511856 |
| H | -1.176637 | 3.104360  | 2.265096  | H | 3.523833  | -5.496086 | -1.164246 |
| H | -4.126878 | -2.009173 | 2.784168  | H | 2.274522  | -0.119675 | 1.372655  |
| H | -5.432669 | -1.949756 | 1.579247  | H | 3.890909  | 0.601431  | 1.549944  |
| H | -3.811574 | -2.519896 | 1.126836  | H | 2.955851  | 0.897612  | 0.095559  |
| H | -7.275350 | -1.257492 | -1.528302 | H | 6.767977  | 2.159552  | -0.840495 |
| H | -9.291483 | -2.405510 | -2.343663 | H | 7.792325  | 4.381698  | -0.604058 |
| H | 12.843372 | -3.076426 | -2.701560 | H | 9.985681  | 6.921828  | 0.782992  |
| H | 11.337916 | -2.534223 | -3.489059 | H | 9.588016  | 5.893337  | -0.618763 |
| H | 11.267076 | -3.640802 | -2.087065 | H | 8.310618  | 6.359065  | 0.541873  |
| H | 11.747900 | 0.293257  | -0.070741 | H | 10.205348 | 2.924861  | 2.642426  |
| H | -9.706662 | 1.442370  | 0.755494  | H | 9.160184  | 0.684279  | 2.402852  |
| H | -0.736220 | -2.354609 | 2.391436  | H | 1.458472  | -0.692617 | -1.063080 |
| H | -0.727531 | -0.445494 | -0.001838 | H | -0.551041 | -2.981180 | -0.842831 |
| H | -1.517939 | -2.426938 | -0.997195 | H | 0.018662  | -3.057624 | -3.147299 |
| H | 0.711707  | -3.111401 | 0.379235  | H | -0.646953 | -0.480913 | -2.603074 |
| H | 1.358836  | -1.449285 | -1.717001 | H | -2.860652 | -2.098659 | -2.359704 |
| H | 1.793493  | -0.256112 | 0.267132  | H | -2.343444 | -1.319808 | -0.204469 |
| H | 1.624599  | -2.256983 | 2.572291  | H | -0.274967 | 0.911196  | -0.509337 |
| H | 2.303570  | 0.039649  | 3.764933  | H | -0.734233 | 0.778090  | 2.136379  |
| H | 3.550098  | -1.096978 | 3.177150  | H | -1.661938 | 1.877800  | 1.077625  |
| H | 3.732236  | 2.970467  | 1.350607  | H | -4.129202 | -1.090231 | 3.304245  |

|   |          |           |           |   |           |           |           |
|---|----------|-----------|-----------|---|-----------|-----------|-----------|
| H | 3.695789 | 5.072147  | 0.189590  | H | -5.449859 | -2.790283 | 4.359414  |
| H | 5.603106 | 4.899512  | -2.308069 | H | -8.307408 | -2.849320 | 3.028346  |
| H | 7.042926 | 2.305497  | -3.108535 | H | -9.060891 | -1.036405 | 0.665307  |
| H | 8.290599 | 0.753491  | -1.516584 | H | -8.553868 | 1.452502  | 0.496039  |
| H | 9.744473 | -1.666302 | -0.949920 | H | -8.556277 | 3.951837  | -0.931601 |
| H | 8.384202 | -4.509675 | -0.710508 | H | -6.546503 | 4.630597  | -3.275027 |
| H | 4.927726 | -3.703728 | -0.553580 | H | -4.136667 | 2.034723  | -3.005128 |

**Table S3.** Optimized Z-Matrixes of **3** in the Gas Phase (Å).

| <b>3a1</b> |           |           |           | <b>3b1</b> |           |           |           |
|------------|-----------|-----------|-----------|------------|-----------|-----------|-----------|
| O          | 5.598317  | -0.239049 | -0.177279 | O          | 5.627673  | 0.198350  | -0.233997 |
| C          | 6.339565  | 0.658584  | 0.676863  | C          | 6.945864  | 0.065914  | 0.337570  |
| C          | 7.061473  | -0.140398 | 1.766972  | C          | 6.826462  | -0.245301 | 1.833463  |
| C          | 6.085767  | -1.006708 | 2.538523  | C          | 5.989682  | 0.805337  | 2.535851  |
| C          | 4.027005  | -2.405135 | 2.383426  | C          | 4.066108  | 2.374591  | 2.326795  |
| C          | 2.966401  | -2.950755 | 1.644708  | C          | 3.016450  | 2.944412  | 1.587280  |
| C          | 2.843870  | -2.544519 | 0.309223  | C          | 2.871500  | 2.509905  | 0.263729  |
| C          | 3.723113  | -1.648466 | -0.336657 | C          | 3.739720  | 1.608804  | -0.387121 |
| C          | 4.750788  | -1.114920 | 0.440962  | C          | 4.783836  | 1.087072  | 0.373680  |
| C          | 4.932596  | -1.480221 | 1.796711  | C          | 4.957236  | 1.437725  | 1.737332  |
| C          | 7.272162  | 1.471056  | -0.188641 | C          | 7.693141  | -0.992195 | -0.438064 |
| C          | 7.979248  | 0.886391  | -1.241436 | C          | 7.057225  | -2.152469 | -0.884276 |
| C          | 8.877677  | 1.628225  | -2.010436 | C          | 7.762155  | -3.150075 | -1.560750 |
| C          | 9.085897  | 2.982258  | -1.719993 | C          | 9.134784  | -2.995175 | -1.790079 |
| C          | 8.381709  | 3.579479  | -0.664609 | C          | 9.783760  | -1.834429 | -1.344972 |
| C          | 7.483950  | 2.829532  | 0.083717  | C          | 9.065754  | -0.847297 | -0.683250 |
| O          | 1.825696  | -3.117516 | -0.444930 | O          | 1.868380  | 3.060595  | -0.524653 |
| C          | 0.687305  | -2.341487 | -0.679415 | C          | 0.555877  | 2.649608  | -0.281808 |
| C          | -0.078817 | -2.954368 | -1.854016 | C          | -0.389737 | 3.654333  | -0.942936 |
| C          | -1.451967 | -2.280256 | -2.019183 | C          | -1.841312 | 3.144438  | -0.904791 |
| C          | -2.192725 | -2.291151 | -0.680155 | C          | -1.900382 | 1.719827  | -1.462310 |
| C          | -1.307386 | -1.587838 | 0.374058  | C          | -0.932987 | 0.834204  | -0.643348 |
| O          | -0.123661 | -2.381166 | 0.495378  | O          | 0.377520  | 1.359622  | -0.872732 |
| O          | 6.301372  | -1.310154 | 3.723843  | O          | 6.179853  | 1.072958  | 3.734742  |
| O          | 4.172429  | -2.785803 | 3.662368  | O          | 4.210317  | 2.739058  | 3.609890  |
| C          | 2.043806  | -3.943770 | 2.300811  | C          | 2.142498  | 3.994834  | 2.225034  |
| C          | 3.604164  | -1.282361 | -1.796325 | C          | 3.550696  | 1.256755  | -1.841277 |
| O          | 9.938350  | 3.800866  | -2.401046 | O          | 9.922031  | -3.902418 | -2.436794 |
| C          | 10.667637 | 3.256470  | -3.490642 | C          | 9.317051  | -5.089018 | -2.927436 |
| O          | 0.677569  | -2.813881 | -3.037789 | O          | -0.291164 | 4.897593  | -0.281802 |
| O          | -2.167556 | -2.895052 | -3.085999 | O          | -2.696296 | 4.067190  | -1.571763 |
| O          | -3.551134 | -1.835316 | -0.757927 | O          | -3.231071 | 1.206221  | -1.621973 |
| C          | -1.936213 | -1.451570 | 1.769954  | C          | -0.927321 | -0.655680 | -1.021115 |

|   |           |           |           |   |           |           |           |
|---|-----------|-----------|-----------|---|-----------|-----------|-----------|
| O | -2.464346 | -0.117365 | 1.880352  | O | -1.752052 | -1.348344 | -0.066771 |
| C | -3.843458 | -0.527943 | -1.011652 | C | -4.007870 | 0.917703  | -0.539076 |
| O | -3.001480 | 0.320181  | -1.224964 | O | -3.657154 | 1.106285  | 0.607804  |
| C | -5.319513 | -0.322549 | -0.945411 | C | -5.296032 | 0.315386  | -0.989090 |
| C | -6.116923 | -1.290765 | -1.566141 | C | -5.919442 | 0.910288  | -2.091829 |
| C | -7.501378 | -1.170604 | -1.579548 | C | -7.136182 | 0.432952  | -2.564449 |
| O | -8.272104 | -2.100227 | -2.206976 | O | -7.752322 | 1.030232  | -3.620611 |
| C | -8.082013 | -0.068096 | -0.951680 | C | -7.720718 | -0.658907 | -1.921489 |
| O | -9.441616 | 0.046209  | -0.977857 | O | -8.920838 | -1.113262 | -2.385540 |
| C | -7.292055 | 0.891209  | -0.312572 | C | -7.092828 | -1.269916 | -0.832770 |
| O | -8.019310 | 1.890664  | 0.295823  | O | -7.775970 | -2.359450 | -0.338839 |
| C | -5.888420 | 0.793405  | -0.279323 | C | -5.858166 | -0.812064 | -0.336714 |
| C | -5.097758 | 1.801719  | 0.491876  | C | -5.188082 | -1.556501 | 0.773702  |
| C | -5.284967 | 3.172467  | 0.242601  | C | -5.892152 | -1.817690 | 1.961702  |
| O | -6.211330 | 3.586239  | -0.691098 | O | -7.204305 | -1.414986 | 2.091182  |
| C | -4.572806 | 4.162488  | 0.918625  | C | -5.320251 | -2.491434 | 3.040219  |
| O | -4.849900 | 5.464605  | 0.596486  | O | -6.108531 | -2.694637 | 4.141507  |
| C | -3.609236 | 3.810066  | 1.859984  | C | -3.992652 | -2.907038 | 2.979702  |
| O | -2.958823 | 4.862210  | 2.454453  | O | -3.528315 | -3.547596 | 4.101077  |
| C | -3.381175 | 2.466774  | 2.123989  | C | -3.257325 | -2.656502 | 1.829566  |
| C | -4.124518 | 1.477059  | 1.468440  | C | -3.846930 | -2.010527 | 0.735442  |
| C | -3.818128 | 0.055027  | 1.822509  | C | -2.982694 | -1.787062 | -0.466201 |
| O | -4.621212 | -0.828294 | 2.010580  | O | -3.302965 | -1.939656 | -1.621573 |
| H | 5.613889  | 1.330275  | 1.159809  | H | 7.458825  | 1.032493  | 0.221713  |
| H | 7.586279  | 0.521768  | 2.460301  | H | 7.809865  | -0.300534 | 2.307289  |
| H | 7.812979  | -0.792946 | 1.302572  | H | 6.342472  | -1.222596 | 1.963718  |
| H | 4.984678  | -2.327042 | 4.003313  | H | 4.984499  | 2.225340  | 3.963947  |
| H | 1.345509  | -4.362480 | 1.578881  | H | 1.600950  | 4.573612  | 1.475786  |
| H | 2.620775  | -4.752181 | 2.760995  | H | 1.412200  | 3.553406  | 2.914686  |
| H | 1.467743  | -3.472121 | 3.104550  | H | 2.757556  | 4.673569  | 2.822152  |
| H | 3.221230  | -0.262952 | -1.929141 | H | 3.498297  | 2.161294  | -2.455078 |
| H | 4.587580  | -1.306921 | -2.273952 | H | 4.376982  | 0.639836  | -2.194153 |
| H | 2.941273  | -1.967322 | -2.324938 | H | 2.611721  | 0.717095  | -1.994087 |
| H | 7.812865  | -0.159192 | -1.479878 | H | 5.991129  | -2.271605 | -0.720405 |
| H | 9.402096  | 1.145615  | -2.826280 | H | 7.235351  | -4.032585 | -1.903485 |
| H | 11.272103 | 4.073897  | -3.885911 | H | 10.115093 | -5.657222 | -3.407120 |
| H | 11.329165 | 2.441971  | -3.169216 | H | 8.884885  | -5.689122 | -2.116550 |
| H | 10.000647 | 2.886733  | -4.279664 | H | 8.536059  | -4.869329 | -3.666371 |
| H | 8.547876  | 4.631613  | -0.459228 | H | 10.845380 | -1.726012 | -1.539831 |
| H | 6.936432  | 3.308902  | 0.891692  | H | 9.580149  | 0.052569  | -0.354756 |
| H | 0.956933  | -1.297004 | -0.900778 | H | 0.350902  | 2.582100  | 0.796897  |
| H | -0.233596 | -4.018912 | -1.602792 | H | -0.070009 | 3.735346  | -1.997334 |
| H | 0.058941  | -2.968692 | -3.768155 | H | -1.072374 | 5.404980  | -0.550702 |
| H | -1.303934 | -1.245294 | -2.339843 | H | -2.188851 | 3.138979  | 0.131904  |
| H | -2.442951 | -3.777968 | -2.797800 | H | -2.515157 | 4.017363  | -2.522089 |
| H | -2.309503 | -3.328855 | -0.343599 | H | -1.521492 | 1.721712  | -2.491859 |



|   |           |           |           |   |           |           |           |
|---|-----------|-----------|-----------|---|-----------|-----------|-----------|
| H | -1.052579 | -0.577893 | 0.031117  | H | -1.183249 | 0.897267  | 0.422499  |
| H | -2.727177 | -2.179489 | 1.961781  | H | -1.290819 | -0.848504 | -2.032655 |
| H | -1.145944 | -1.550540 | 2.516704  | H | 0.089328  | -1.037667 | -0.908303 |
| H | -5.658528 | -2.140964 | -2.055029 | H | -5.462502 | 1.760510  | -2.582079 |
| H | -9.197970 | -1.837125 | -2.092176 | H | -8.575039 | 0.546402  | -3.789948 |
| H | -9.649350 | 0.864245  | -0.494448 | H | -9.159820 | -1.864330 | -1.815614 |
| H | -7.636394 | 2.742204  | 0.007944  | H | -7.846829 | -2.240844 | 0.628411  |
| H | -6.138243 | 4.551694  | -0.766092 | H | -7.484998 | -1.621168 | 2.997705  |
| H | -4.239210 | 6.034295  | 1.087549  | H | -5.565036 | -3.103743 | 4.831425  |
| H | -2.279302 | 4.531433  | 3.055428  | H | -2.587050 | -3.739947 | 4.004285  |
| H | -2.622469 | 2.174054  | 2.842240  | H | -2.217172 | -2.959566 | 1.771272  |

**Table S4.** Optimized Z-Matrixes of **4** in the Gas Phase (Å).

| <b>4a1</b> |           |           |           | <b>4b1</b> |           |           |           |
|------------|-----------|-----------|-----------|------------|-----------|-----------|-----------|
| O          | -5.666603 | 0.230358  | -0.143488 | O          | -5.505326 | -0.257771 | -0.275828 |
| C          | -6.381265 | -0.820498 | 0.541661  | C          | -6.847447 | -0.132763 | 0.246684  |
| C          | -7.063837 | -0.248440 | 1.788627  | C          | -6.798128 | -0.022914 | 1.774369  |
| C          | -6.059329 | 0.453754  | 2.679598  | C          | -6.046031 | -1.193779 | 2.375861  |
| C          | -3.982823 | 1.827433  | 2.742205  | C          | -4.155885 | -2.792013 | 2.062824  |
| C          | -2.935639 | 2.504720  | 2.096102  | C          | -3.064404 | -3.272075 | 1.321659  |
| C          | -2.847096 | 2.351579  | 0.706012  | C          | -2.840593 | -2.690449 | 0.067397  |
| C          | -3.744763 | 1.598088  | -0.077581 | C          | -3.653916 | -1.687859 | -0.505008 |
| C          | -4.779248 | 0.954656  | 0.601588  | C          | -4.722413 | -1.235141 | 0.269465  |
| C          | -4.918844 | 1.050184  | 2.009154  | C          | -4.989316 | -1.758096 | 1.557013  |
| C          | -7.345201 | -1.449844 | -0.434972 | C          | -7.503186 | 1.051456  | -0.421224 |
| C          | -8.051991 | -0.677532 | -1.359031 | C          | -6.803282 | 2.239835  | -0.641147 |
| C          | -8.978018 | -1.256684 | -2.228743 | C          | -7.423838 | 3.350021  | -1.216580 |
| C          | -9.214986 | -2.635608 | -2.171561 | C          | -8.776251 | 3.281001  | -1.573572 |
| C          | -8.510850 | -3.420516 | -1.246823 | C          | -9.488761 | 2.092700  | -1.357125 |
| C          | -7.585761 | -2.830310 | -0.396231 | C          | -8.853474 | 0.994262  | -0.793190 |
| O          | -1.856931 | 3.034818  | 0.005796  | O          | -1.797838 | -3.213501 | -0.692559 |
| C          | -0.533246 | 2.579345  | 0.120925  | C          | -0.636178 | -2.435899 | -0.828269 |
| C          | 0.368151  | 3.690660  | -0.418128 | C          | 0.188561  | -3.056971 | -1.956737 |
| C          | 1.832181  | 3.239744  | -0.456865 | C          | 1.543338  | -2.354390 | -2.095556 |
| C          | 1.904352  | 1.911417  | -1.212739 | C          | 2.217452  | -2.342835 | -0.721988 |
| C          | 0.957371  | 0.882913  | -0.553227 | C          | 1.281526  | -1.677611 | 0.312242  |
| O          | -0.374000 | 1.406093  | -0.668527 | O          | 0.099068  | -2.486302 | 0.387418  |
| O          | -6.239853 | 0.530746  | 3.906641  | O          | -6.314595 | -1.608485 | 3.515305  |
| O          | -4.096939 | 1.959541  | 4.072177  | O          | -4.382229 | -3.317554 | 3.276052  |
| C          | -2.019119 | 3.379930  | 2.914054  | C          | -2.204070 | -4.369283 | 1.891951  |
| C          | -3.598389 | 1.502460  | -1.575525 | C          | -3.450147 | -1.140121 | -1.896518 |
| O          | 10.095970 | -3.306538 | -2.967467 | O          | -9.483575 | 4.300827  | -2.138483 |
| C          | 10.833590 | -2.566350 | -3.928585 | C          | -8.812548 | 5.525871  | -2.392584 |

|   |           |           |           |   |           |           |           |
|---|-----------|-----------|-----------|---|-----------|-----------|-----------|
| O | 0.314032  | 4.862835  | 0.385124  | O | -0.463071 | -2.959686 | -3.217318 |
| O | 2.631302  | 4.194219  | -1.130515 | O | 2.374471  | -3.046623 | -3.008392 |
| O | 3.241883  | 1.436409  | -1.428396 | O | 3.556257  | -1.824648 | -0.732875 |
| C | 0.979921  | -0.516772 | -1.187795 | C | 1.866510  | -1.552094 | 1.727856  |
| O | 1.805088  | -1.354367 | -0.357662 | O | 2.338347  | -0.200572 | 1.881068  |
| C | 4.015052  | 0.995943  | -0.399841 | C | 3.810313  | -0.509947 | -0.968716 |
| O | 3.659410  | 0.990485  | 0.761843  | O | 2.951207  | 0.314759  | -1.209461 |
| C | 5.319582  | 0.502469  | -0.932171 | C | 5.276888  | -0.257231 | -0.849657 |
| C | 5.937995  | 1.292993  | -1.907654 | C | 6.124556  | -1.190869 | -1.456778 |
| C | 7.169608  | 0.928981  | -2.439816 | C | 7.504109  | -1.022970 | -1.425058 |
| O | 7.783496  | 1.712156  | -3.368202 | O | 8.326250  | -1.916867 | -2.038955 |
| C | 7.771820  | -0.246277 | -1.989068 | C | 8.027454  | 0.090143  | -0.766017 |
| O | 8.986108  | -0.589795 | -2.510405 | O | 9.383206  | 0.250846  | -0.748367 |
| C | 7.147909  | -1.050511 | -1.032029 | C | 7.186476  | 1.012975  | -0.139138 |
| O | 7.849530  | -2.197381 | -0.728679 | O | 7.859636  | 2.028101  | 0.505965  |
| C | 5.899668  | -0.709794 | -0.478586 | C | 5.786763  | 0.867232  | -0.151653 |
| C | 5.235210  | -1.649678 | 0.475944  | C | 4.938256  | 1.835877  | 0.608242  |
| C | 5.934174  | -2.105002 | 1.607307  | C | 5.083635  | 3.216151  | 0.384759  |
| O | 7.236497  | -1.707010 | 1.823229  | O | 6.022899  | 3.677030  | -0.513355 |
| C | 5.367554  | -2.972230 | 2.540644  | C | 4.316409  | 4.169502  | 1.053098  |
| O | 6.150672  | -3.355660 | 3.597288  | O | 4.556035  | 5.486246  | 0.759133  |
| C | 4.049295  | -3.394843 | 2.391183  | C | 3.338655  | 3.768484  | 1.959551  |
| O | 3.588559  | -4.234854 | 3.374578  | O | 2.632745  | 4.787683  | 2.549678  |
| C | 3.318189  | -2.955784 | 1.296356  | C | 3.151081  | 2.414136  | 2.197190  |
| C | 3.903997  | -2.114488 | 0.341828  | C | 3.949073  | 1.461881  | 1.550352  |
| C | 3.045788  | -1.701999 | -0.813696 | C | 3.685989  | 0.024406  | 1.878176  |
| O | 3.376461  | -1.655282 | -1.974832 | O | 4.515197  | -0.827787 | 2.092032  |
| H | -5.643070 | -1.571681 | 0.860561  | H | -7.393049 | -1.050149 | -0.019942 |
| H | -7.826708 | 0.480672  | 1.484115  | H | -6.283221 | 0.905167  | 2.056976  |
| H | -7.569341 | -1.031940 | 2.358897  | H | -7.804083 | 0.018412  | 2.199599  |
| H | -4.912863 | 1.456025  | 4.337232  | H | -5.156172 | -2.826288 | 3.658603  |
| H | -1.329369 | 2.784975  | 3.524776  | H | -2.722958 | -5.334559 | 1.851675  |
| H | -1.425296 | 4.045890  | 2.287865  | H | -1.265856 | -4.454574 | 1.347411  |
| H | -2.605649 | 3.983485  | 3.612554  | H | -1.989062 | -4.172718 | 2.945908  |
| H | -4.195672 | 0.675641  | -1.961323 | H | -4.409032 | -1.066039 | -2.416485 |
| H | -3.941557 | 2.421059  | -2.066775 | H | -3.027499 | -0.128041 | -1.879429 |
| H | -2.553695 | 1.354937  | -1.853344 | H | -2.779428 | -1.768220 | -2.482690 |
| H | -7.862922 | 0.389496  | -1.416549 | H | -5.751382 | 2.295407  | -0.379752 |
| H | -9.501034 | -0.629587 | -2.940622 | H | -6.848270 | 4.252638  | -1.382810 |
| H | 10.173887 | -2.080349 | -4.658532 | H | -7.977484 | 5.392379  | -3.091870 |
| H | 11.466803 | -3.289877 | -4.443626 | H | -9.554404 | 6.187270  | -2.841891 |
| H | 11.466858 | -1.805645 | -3.454780 | H | -8.436712 | 5.981193  | -1.467512 |
| H | -8.699475 | -4.488499 | -1.222593 | H | 10.532872 | 2.053012  | -1.648584 |
| H | -7.039609 | -3.453747 | 0.307612  | H | -9.416212 | 0.076145  | -0.642616 |
| H | -0.286993 | 2.346460  | 1.167613  | H | -0.888898 | -1.389089 | -1.057470 |
| H | 0.043057  | 3.902358  | -1.447250 | H | 0.369332  | -4.107623 | -1.686996 |

|   |           |           |           |   |           |           |           |
|---|-----------|-----------|-----------|---|-----------|-----------|-----------|
| H | -0.570330 | 5.239755  | 0.280808  | H | -1.226694 | -3.552080 | -3.190176 |
| H | 2.183651  | 3.090600  | 0.573810  | H | 1.374057  | -1.319714 | -2.425753 |
| H | 2.482341  | 5.035627  | -0.675500 | H | 1.867999  | -3.115901 | -3.830558 |
| H | 1.545292  | 2.080813  | -2.232949 | H | 2.368137  | -3.380689 | -0.408213 |
| H | 1.216223  | 0.763405  | 0.505273  | H | 1.017266  | -0.666911 | -0.020516 |
| H | 1.361444  | -0.521748 | -2.210795 | H | 2.681318  | -2.251967 | 1.923595  |
| H | -0.031206 | -0.928273 | -1.161591 | H | 1.062297  | -1.700026 | 2.451467  |
| H | 5.463183  | 2.204342  | -2.249234 | H | 5.708845  | -2.050953 | -1.966822 |
| H | 8.615832  | 1.278504  | -3.610414 | H | 9.238214  | -1.625168 | -1.888116 |
| H | 9.234068  | -1.424530 | -2.077313 | H | 9.547139  | 1.067748  | -0.246771 |
| H | 7.909616  | -2.248815 | 0.245003  | H | 7.456591  | 2.869683  | 0.217128  |
| H | 7.512863  | -2.068057 | 2.681257  | H | 5.920239  | 4.640784  | -0.572845 |
| H | 5.609719  | -3.894346 | 4.193780  | H | 3.916487  | 6.025733  | 1.247406  |
| H | 2.655311  | -4.433081 | 3.226290  | H | 1.960577  | 4.422311  | 3.138685  |
| H | 2.284871  | -3.262690 | 1.172585  | H | 2.382271  | 2.083509  | 2.887862  |

**Table S5:** Important Thermodynamic Parameters of Compound **1** (au).

| species      | in gas phase |              |              |              |              |              | in MeOH      |
|--------------|--------------|--------------|--------------|--------------|--------------|--------------|--------------|
|              | $E$          | $E'=E+ZPE$   | $H$          | $G$          | $E_{lbs}$    | $E_w$        | $E_s$        |
| <b>1a1</b>   | -1683.670741 | -1683.168707 | -1683.135254 | -1683.233946 | -1684.117687 | -1683.040046 | -1683.702546 |
| <b>1a1'</b>  | -1683.664255 | -1683.161946 | -1683.128763 | -1683.226633 | -1684.110253 | -1683.033424 | -1683.700107 |
| <b>1a1''</b> | -1683.663498 | -1683.161737 | -1683.128199 | -1683.227552 | -1684.109628 | -1683.032384 | -1683.698869 |
| <b>1a2</b>   | -1683.669496 | -1683.167092 | -1683.133847 | -1683.231843 | -1684.115736 | -1683.038881 | -1683.701602 |
| <b>1b1</b>   | -1683.670977 | -1683.169000 | -1683.135539 | -1683.234500 | -1684.117859 | -1683.040292 | -1683.702745 |
| <b>1b1'</b>  | -1683.664629 | -1683.162339 | -1683.129140 | -1683.226948 | -1684.110636 | -1683.033831 | -1683.700428 |
| <b>1b1''</b> | -1683.664632 | -1683.162549 | -1683.129227 | -1683.227548 | -1684.110613 | -1683.033538 | -1683.695274 |
| <b>1b2</b>   | -1683.668929 | -1683.166600 | -1683.133310 | -1683.231640 | -1684.115225 | -1683.038293 | -1683.701359 |

$E$ ,  $E'$ ,  $H$ ,  $G$ : total energy, total energy with zero point energy (ZPE), enthalpy and Gibbs free energy in the gas phase at the B3LYP/6-31G\*\* level;  $E_{lbs}$ : single point energy in the gas phase at the B3LYP/6-311++G\*\*//B3LYP/6-31G\*\* level;  $E_w$ : single point energy at the B3PW91/6-31G\*\*//B3LYP/6-31G\*\* level;  $E_s$ : single point energy in MeOH solution at the B3LYP-SCRF/6-31G\*\*//B3LYP/6-31G\*\* level with COSMO model.

**Table S6.** Conformational Analysis of Compound 1.

| species      | in gas phase |             |               |                |              |             |                      |                  |               |                | in MeOH          |                |
|--------------|--------------|-------------|---------------|----------------|--------------|-------------|----------------------|------------------|---------------|----------------|------------------|----------------|
|              | $\Delta E^a$ | $P_E\%{}^b$ | $\Delta E'^c$ | $P_{E'}\%{}^d$ | $\Delta G^e$ | $P_G\%{}^f$ | $\Delta E_{lbs}{}^g$ | $P_{Elbs}\%{}^h$ | $\Delta Ew^i$ | $P_{Ew}\%{}^j$ | $\Delta E_s{}^k$ | $P_{Es}\%{}^l$ |
| <b>1a1</b>   | 0.15         | 37.0        | 0.18          | 37.6           | 0.35         | 33.4        | 0.11                 | 41.6             | 0.15          | 36.4           | 0.12             | 32.4           |
| <b>1a1'</b>  | 4.22         | 0.0         | 4.43          | 0.0            | 4.94         | 0.0         | 4.77                 | 0.0              | 4.31          | 0.0            | 1.66             | 2.4            |
| <b>1a1''</b> | 4.69         | 0.0         | 4.56          | 0.0            | 4.36         | 0.0         | 5.17                 | 0.0              | 4.96          | 0.0            | 2.43             | 0.7            |
| <b>1a2</b>   | 0.93         | 9.9         | 1.20          | 6.8            | 1.67         | 3.6         | 1.33                 | 5.3              | 0.89          | 10.6           | 0.72             | 11.9           |
| <b>1b1</b>   | 0.00         | 47.5        | 0.0           | 51.3           | 0.00         | 60.0        | 0.00                 | 50.1             | 0.00          | 47.2           | 0.00             | 40.0           |
| <b>1b1'</b>  | 3.98         | 0.1         | 4.18          | 0.0            | 4.74         | 0.0         | 4.53                 | 0.0              | 4.05          | 0.1            | 1.45             | 3.4            |
| <b>1b1''</b> | 3.98         | 0.1         | 4.05          | 0.1            | 4.36         | 0.0         | 4.55                 | 0.0              | 4.24          | 0.0            | 4.69             | 0.0            |
| <b>1b2</b>   | 1.29         | 5.4         | 1.51          | 4.0            | 1.79         | 2.9         | 1.65                 | 3.1              | 1.25          | 5.7            | 0.87             | 9.2            |

<sup>a,c,e</sup> Relative energy, relative energy with *ZPE*, and relative Gibbs free energy at the B3LYP/6-31G\*\* level in the gas phase, respectively (kcal/mol). <sup>b,d,f</sup> Conformational distribution calculated by using the respective parameters above at the B3LYP/6-31G\*\* level in the gas phase. <sup>g,h</sup> Relative energy (kcal/mol) and conformational distribution in the gas phase at the B3LYP/6-311++G\*\*//B3LYP/6-31G\*\* level, respectively. <sup>i,j</sup> Relative energy (kcal/mol) and conformational distribution in the gas phase at the B3PW91/6-31G\*\*//B3LYP/6-31G\*\* level, respectively. <sup>k,l</sup> Relative energy (kcal/mol) and conformational distribution in MeOH solution at the B3LYP-SCRF/6-31G\*\*//B3LYP/6-31G\*\* level with COSMO model, respectively.

**Table S7.** Important Thermodynamic Parameters of Compound 2 (au).

| species      | in gas phase  |              |              |              |              |              | in MeOH      |
|--------------|---------------|--------------|--------------|--------------|--------------|--------------|--------------|
|              | $E$           | $E'=E+ZPE$   | $H$          | $G$          | $E_{lbs}$    | $Ew$         | $E_s$        |
| <b>2a1</b>   | -2822.597322  | -2821.907993 | -2821.856801 | -2821.994221 | -2823.354767 | -2821.534986 | -2822.650035 |
| <b>2a1'</b>  | -2822.5901781 | -2821.900600 | -2821.849679 | -2821.985525 | -2823.346718 | -2821.527563 | -2822.642871 |
| <b>2a1''</b> | -2822.592248  | -2821.902060 | -2821.851561 | -2821.984266 | -2823.347147 | -2821.528264 | -2822.644814 |
| <b>2a2</b>   | -2822.595748  | -2821.906129 | -2821.855126 | -2821.991469 | -2823.351891 | -2821.533379 | -2822.648684 |
| <b>2b1</b>   | -2822.597261  | -2821.907858 | -2821.856697 | -2821.994041 | -2823.354784 | -2821.534898 | -2822.650214 |

|              |              |              |              |              |              |              |              |
|--------------|--------------|--------------|--------------|--------------|--------------|--------------|--------------|
| <b>2b1'</b>  | -2822.590776 | -2821.901366 | -2821.850394 | -2821.986994 | -2823.347458 | -2821.528137 | -2822.642946 |
| <b>2b1''</b> | -2822.591799 | -2821.902487 | -2821.851411 | -2821.988085 | -2823.348230 | -2821.529139 | -2822.642599 |
| <b>2b2</b>   | -2822.595334 | -2821.905743 | -2821.854723 | -2821.991125 | -2823.351511 | -2821.532948 | -2822.648642 |

*E*, *E'*, *H*, *G*: total energy, total energy with zero point energy (ZPE), enthalpy and Gibbs free energy in the gas phase at the B3LYP/6-31G\*\* level; *E<sub>lbs</sub>*: single point energy in gas at the B3LYP/6-311++G\*\*//B3LYP/6-31G\*\* level; *E<sub>s</sub>*: single point energy in methanol solution at the B3LYP-SCRF/6-31G\*\*//B3LYP/6-31G\*\* level with COSMO model.

**Table S8.** Conformational Analysis of Compound **2**.

| species      | in gas phase |           |               |              |              |           |                    |                |                |              | in MeOH        |              |
|--------------|--------------|-----------|---------------|--------------|--------------|-----------|--------------------|----------------|----------------|--------------|----------------|--------------|
|              | $\Delta E^a$ | $P_E\%^b$ | $\Delta E'^c$ | $P_{E'}\%^d$ | $\Delta G^e$ | $P_G\%^f$ | $\Delta E_{lbs}^g$ | $P_{Elbs}\%^h$ | $\Delta E_w^i$ | $P_{Ew}\%^j$ | $\Delta E_s^k$ | $P_{Es}\%^l$ |
| <b>2a1</b>   | 0.00         | 44.3      | 0.00          | 47.5         | 0.00         | 52.1      | 0.01               | 47.6           | 0.00           | 45.2         | 0.11           | 37.3         |
| <b>2a1'</b>  | 4.48         | 0.0       | 4.64          | 0.0          | 5.46         | 0.0       | 5.06               | 0.0            | 4.66           | 0.0          | 4.61           | 0.0          |
| <b>2a1''</b> | 3.18         | 0.2       | 3.72          | 0.1          | 6.25         | 0.0       | 4.79               | 0.0            | 4.22           | 0.0          | 3.39           | 0.2          |
| <b>2a2</b>   | 0.99         | 8.4       | 1.17          | 6.6          | 1.73         | 2.8       | 1.82               | 2.3            | 1.01           | 8.2          | 0.96           | 8.9          |
| <b>2b1</b>   | 0.04         | 41.5      | 0.08          | 41.2         | 0.11         | 43.0      | 0.00               | 48.5           | 0.06           | 41.2         | 0.00           | 45.1         |
| <b>2b1'</b>  | 4.11         | 0.0       | 4.16          | 0.0          | 4.54         | 0.0       | 4.60               | 0.0            | 4.30           | 0.0          | 4.56           | 0.0          |
| <b>2b1''</b> | 3.47         | 0.1       | 3.46          | 0.1          | 3.85         | 0.1       | 4.11               | 0.0            | 3.67           | 0.1          | 4.78           | 0.0          |
| <b>2b2</b>   | 1.25         | 5.4       | 1.41          | 4.4          | 1.94         | 2.0       | 2.05               | 1.5            | 1.28           | 5.2          | 0.99           | 8.5          |

<sup>a,c,e</sup> Relative energy, relative energy with ZPE, and relative Gibbs free energy at the B3LYP/6-31G\*\* level in the gas phase, respectively (kcal/mol). <sup>b,d,f</sup> Conformational distribution calculated by using the respective parameters above at the B3LYP/6-31G\*\* level in the gas phase. <sup>g,h</sup> Relative energy (kcal/mol) and conformational distribution at the B3LYP/6-311++G\*\*//B3LYP/6-31G\*\* level, respectively. <sup>i,j</sup> Relative energy (kcal/mol) and conformational distribution in the gas phase at the B3PW91/6-31G\*\*//B3LYP/6-31G\*\* level, respectively. <sup>k,l</sup> Relative energy (kcal/mol) and conformational distribution in MeOH solution at the B3LYP-SCRF/6-31G\*\*//B3LYP/6-31G\*\* level with COSMO model, respectively.

**Table S9:** Important Thermodynamic Parameters of Compound **3** in the Gas Phase (au).

| species    | $E$          | $E'=E+ZPE$   | $H$          | $G$          |
|------------|--------------|--------------|--------------|--------------|
| <b>3a1</b> | -2822.586948 | -2821.897946 | -2821.846640 | -2821.983991 |
| <b>3b1</b> | -2822.587197 | -2821.898049 | -2821.846787 | -2821.984185 |

$E$ ,  $E'$ ,  $H$ ,  $G$ : total energy, total energy with zero point energy (ZPE), enthalpy and Gibbs free energy in the gas phase at the B3LYP/6-31G\*\* level.

**Table S10.** Conformational Analysis of Compound **3** in the Gas Phase.

| species    | $\Delta E^a$ | $P_E\%^b$ | $\Delta E'^c$ | $P_{E'}\%^d$ | $\Delta G^e$ | $P_G\%^f$ |
|------------|--------------|-----------|---------------|--------------|--------------|-----------|
| <b>3a1</b> | 0.16         | 43.4      | 0.06          | 47.3         | 0.12         | 44.9      |
| <b>3b1</b> | 0.00         | 56.5      | 0.00          | 52.7         | 0.00         | 55.1      |

<sup>a,c,e</sup> Relative energy, relative energy with  $ZPE$ , and relative Gibbs free energy, respectively (kcal/mol). <sup>b,d,f</sup> Conformational distribution calculated by using the respective parameters above at the B3LYP/6-31G\*\* level in the gas phase, respectively.

**Table S11:** Important Thermodynamic Parameters of Compound **4** in the Gas Phase (au).

| species    | $E$           | $E'=E+ZPE$   | $H$          | $G$          |
|------------|---------------|--------------|--------------|--------------|
| <b>4a1</b> | -2822.5903321 | -2821.900973 | -2821.849723 | -2821.986822 |
| <b>4b1</b> | -2822.5899219 | -2821.900680 | -2821.849350 | -2821.986852 |

$E$ ,  $E'$ ,  $H$ ,  $G$ : total energy, total energy with zero point energy (ZPE), enthalpy and Gibbs free energy in the gas phase at the B3LYP/6-31G\*\* level.

**Table 12.** Conformational Analysis of Compound **4** in the Gas Phase.

| species    | $\Delta E^a$ | $P_E\%^b$ | $\Delta E'^c$ | $P_{E'}\%^d$ | $\Delta G^e$ | $P_G\%^f$ |
|------------|--------------|-----------|---------------|--------------|--------------|-----------|
| <b>4a1</b> | 0.00         | 60.7      | 0.00          | 57.7         | 0.02         | 49.2      |
| <b>4b1</b> | 0.26         | 39.3      | 0.18          | 42.3         | 0.00         | 50.8      |

<sup>a,c,e</sup> Relative energy, relative energy with  $ZPE$ , and relative Gibbs free energy, respectively

(kcal/mol). <sup>b,d,f</sup> Conformational distribution calculated by using the respective parameters above at the B3LYP/6-31G\*\* level in the gas phase, respectively.

**Table S13.** Frequencies of Compound **1** at the B3LYP/6-31G\*\* Level in the Gas Phase (cm<sup>-1</sup>).

| species    | frequencies |              |      |      |      |      |      |      |      |      |      |      |      |      |      |      |      |      |      |      |      |      |      |      |      |      |      |      |      |      |      |
|------------|-------------|--------------|------|------|------|------|------|------|------|------|------|------|------|------|------|------|------|------|------|------|------|------|------|------|------|------|------|------|------|------|------|
| <b>1a1</b> | 16          | 23           | 26   | 34   | 39   | 42   | 64   | 72   | 92   | 97   | 101  | 104  | 114  | 128  | 131  | 143  | 151  | 160  | 170  | 175  | 208  | 229  | 238  | 240  | 242  | 267  | 271  |      |      |      |      |
|            | 280         | 291          | 303  | 309  | 333  | 348  | 358  | 361  | 373  | 388  | 392  | 407  | 421  | 424  | 430  | 436  | 440  | 451  | 454  | 470  | 490  | 517  | 523  | 527  | 548  | 557  | 570  | 593  |      |      |      |
|            | 601         | 613          | 637  | 652  | 675  | 683  | 714  | 722  | 730  | 739  | 748  | 801  | 829  | 839  | 848  | 855  | 874  | 909  | 918  | 935  | 954  | 962  | 966  | 1001 | 1020 | 1026 | 1028 | 1030 |      |      |      |
|            | 1051        | 1058         | 1063 | 1064 | 1067 | 1072 | 1075 | 1076 | 1098 | 1104 | 1120 | 1128 | 1138 | 1139 | 1149 | 1158 | 1174 | 1177 | 1193 | 1201 | 1211 | 1212 | 1214 | 1235 | 1240 | 1257 | 1262 | 1275 | 1280 | 1299 |      |
|            | 1330        | 1332         | 1338 | 1346 | 1351 | 1356 | 1364 | 1378 | 1380 | 1380 | 1383 | 1402 | 1409 | 1419 | 1419 | 1427 | 1432 | 1440 | 1446 | 1452 | 1459 | 1463 | 1467 | 1476 | 1487 | 1489 | 1496 | 1504 | 1506 | 1514 |      |
|            | 1514        | 1519         | 1524 | 1563 | 1632 | 1634 | 1667 | 1673 | 1709 | 2975 | 2991 | 2999 | 3007 | 3017 | 3017 | 3023 | 3042 | 3046 | 3047 | 3063 | 3080 | 3101 | 3102 | 3105 | 3124 | 3151 | 3166 | 3170 | 3176 | 3200 |      |
|            | 3214        | 3225         | 3278 | 3792 | 3793 | 3796 | 3831 |      |      |      |      |      |      |      |      |      |      |      |      |      |      |      |      |      |      |      |      |      |      |      |      |
|            | <b>1a1'</b> | 13           | 22   | 23   | 29   | 38   | 53   | 66   | 76   | 93   | 104  | 108  | 121  | 130  | 136  | 146  | 149  | 153  | 166  | 181  | 198  | 218  | 231  | 235  | 242  | 248  | 268  | 275  |      |      |      |
|            |             | 284          | 294  | 303  | 309  | 343  | 345  | 354  | 362  | 380  | 389  | 395  | 415  | 425  | 425  | 432  | 435  | 439  | 446  | 467  | 474  | 489  | 510  | 521  | 524  | 547  | 557  | 573  | 589  |      |      |
|            |             | 602          | 613  | 638  | 648  | 656  | 681  | 705  | 717  | 735  | 740  | 770  | 799  | 824  | 830  | 847  | 859  | 873  | 913  | 917  | 937  | 954  | 961  | 966  | 989  | 1014 | 1023 | 1027 | 1030 |      |      |
|            |             | 1054         | 1057 | 1061 | 1063 | 1069 | 1073 | 1075 | 1079 | 1092 | 1096 | 1120 | 1123 | 1138 | 1138 | 1140 | 1157 | 1172 | 1177 | 1188 | 1201 | 1209 | 1212 | 1213 | 1234 | 1239 | 1255 | 1260 | 1271 | 1279 | 1299 |
|            |             | 1324         | 1329 | 1337 | 1343 | 1355 | 1358 | 1371 | 1373 | 1378 | 1380 | 1383 | 1403 | 1408 | 1417 | 1421 | 1427 | 1432 | 1437 | 1446 | 1452 | 1457 | 1458 | 1466 | 1472 | 1484 | 1489 | 1501 | 1505 | 1507 | 1514 |
|            |             | 1516         | 1519 | 1520 | 1563 | 1628 | 1633 | 1665 | 1673 | 1708 | 2976 | 2995 | 3006 | 3017 | 3019 | 3021 | 3032 | 3044 | 3048 | 3055 | 3062 | 3079 | 3094 | 3098 | 3107 | 3124 | 3151 | 3170 | 3176 | 3185 | 3200 |
|            |             | 3214         | 3226 | 3277 | 3789 | 3791 | 3795 | 3833 |      |      |      |      |      |      |      |      |      |      |      |      |      |      |      |      |      |      |      |      |      |      |      |
|            |             | <b>1a1''</b> | 17   | 17   | 21   | 31   | 39   | 45   | 61   | 69   | 86   | 95   | 97   | 99   | 112  | 115  | 131  | 145  | 158  | 160  | 174  | 182  | 214  | 230  | 239  | 242  | 248  | 266  | 273  |      |      |
|            |             |              | 280  | 297  | 299  | 312  | 325  | 346  | 350  | 366  | 375  | 384  | 391  | 413  | 416  | 423  | 428  | 434  | 437  | 438  | 465  | 479  | 489  | 505  | 522  | 525  | 544  | 555  | 570  | 591  |      |
| 603        |             |              | 618  | 637  | 650  | 659  | 680  | 712  | 715  | 730  | 739  | 759  | 800  | 827  | 830  | 847  | 851  | 872  | 905  | 918  | 932  | 953  | 961  | 961  | 992  | 1016 | 1023 | 1029 | 1030 |      |      |
| 1045       |             |              | 1059 | 1066 | 1067 | 1068 | 1072 | 1074 | 1076 | 1089 | 1098 | 1120 | 1125 | 1138 | 1138 | 1144 | 1158 | 1173 | 1178 | 1192 | 1200 | 1209 | 1211 | 1218 | 1234 | 1238 | 1258 | 1264 | 1273 | 1279 | 1299 |
| 1326       |             |              | 1331 | 1338 | 1344 | 1352 | 1354 | 1370 | 1377 | 1377 | 1379 | 1382 | 1402 | 1408 | 1416 | 1420 | 1425 | 1428 | 1439 | 1443 | 1453 | 1459 | 1460 | 1466 | 1477 | 1485 | 1489 | 1495 | 1501 | 1505 | 1511 |
| 1518       |             |              | 1519 | 1526 | 1563 | 1626 | 1633 | 1665 | 1673 | 1707 | 2976 | 2989 | 3007 | 3009 | 3017 | 3023 | 3024 | 3035 | 3047 | 3063 | 3065 | 3080 | 3099 | 3116 | 3124 | 3124 | 3151 | 3163 | 3165 | 3176 | 3200 |
| 3214       |             |              | 3224 | 3272 | 3792 | 3797 | 3799 | 3831 |      |      |      |      |      |      |      |      |      |      |      |      |      |      |      |      |      |      |      |      |      |      |      |
| <b>1a2</b> |             |              | 16   | 21   | 25   | 31   | 42   | 46   | 67   | 73   | 90   | 99   | 103  | 117  | 133  |      |      |      |      |      |      |      |      |      |      |      |      |      |      |      |      |

|              |      |      |      |      |      |      |      |      |      |      |      |      |      |      |
|--------------|------|------|------|------|------|------|------|------|------|------|------|------|------|------|
|              | 143  | 146  | 151  | 155  | 164  | 175  | 192  | 209  | 230  | 237  | 242  | 247  | 263  | 274  |
|              | 284  | 295  | 304  | 316  | 320  | 341  | 351  | 362  | 371  | 387  | 404  | 409  | 422  | 425  |
|              | 429  | 435  | 442  | 453  | 460  | 472  | 489  | 519  | 522  | 526  | 544  | 554  | 571  | 594  |
|              | 605  | 611  | 636  | 653  | 676  | 679  | 700  | 723  | 734  | 736  | 744  | 800  | 829  | 844  |
|              | 848  | 871  | 874  | 908  | 919  | 935  | 954  | 961  | 970  | 998  | 1022 | 1026 | 1027 | 1030 |
|              | 1058 | 1061 | 1065 | 1071 | 1073 | 1073 | 1075 | 1077 | 1097 | 1103 | 1118 | 1127 | 1138 | 1139 |
|              | 1161 | 1171 | 1178 | 1199 | 1201 | 1211 | 1212 | 1218 | 1234 | 1238 | 1258 | 1261 | 1271 | 1278 |
|              | 1322 | 1331 | 1337 | 1345 | 1353 | 1355 | 1367 | 1373 | 1376 | 1381 | 1383 | 1403 | 1409 | 1416 |
|              | 1427 | 1431 | 1440 | 1449 | 1454 | 1458 | 1460 | 1466 | 1480 | 1489 | 1491 | 1505 | 1508 | 1512 |
|              | 1519 | 1519 | 1524 | 1563 | 1630 | 1633 | 1669 | 1673 | 1704 | 2976 | 2996 | 3008 | 3015 | 3017 |
|              | 3030 | 3037 | 3047 | 3052 | 3064 | 3079 | 3099 | 3110 | 3115 | 3123 | 3150 | 3165 | 3165 | 3176 |
|              | 3213 | 3225 | 3236 | 3792 | 3792 | 3795 | 3832 |      |      |      |      |      |      |      |
| <b>1b1</b>   | 16   | 19   | 24   | 32   | 37   | 44   | 66   | 78   | 84   | 89   | 99   | 104  | 115  |      |
|              | 133  | 135  | 142  | 152  | 163  | 166  | 179  | 216  | 231  | 236  | 241  | 243  | 265  | 274  |
|              | 282  | 295  | 301  | 309  | 327  | 335  | 355  | 363  | 378  | 388  | 397  | 409  | 422  | 424  |
|              | 430  | 435  | 439  | 454  | 457  | 470  | 488  | 519  | 523  | 528  | 546  | 556  | 568  | 593  |
|              | 600  | 614  | 637  | 652  | 675  | 688  | 710  | 718  | 730  | 738  | 747  | 800  | 829  | 841  |
|              | 848  | 854  | 873  | 908  | 917  | 933  | 953  | 962  | 968  | 1000 | 1021 | 1026 | 1028 | 1030 |
|              | 1050 | 1059 | 1063 | 1064 | 1068 | 1072 | 1074 | 1076 | 1097 | 1105 | 1119 | 1126 | 1137 | 1139 |
|              | 1162 | 1172 | 1178 | 1193 | 1200 | 1211 | 1211 | 1214 | 1235 | 1238 | 1257 | 1262 | 1273 | 1278 |
|              | 1329 | 1331 | 1337 | 1346 | 1353 | 1355 | 1364 | 1375 | 1377 | 1379 | 1382 | 1404 | 1408 | 1417 |
|              | 1425 | 1433 | 1440 | 1446 | 1451 | 1460 | 1462 | 1466 | 1478 | 1485 | 1488 | 1496 | 1504 | 1511 |
|              | 1514 | 1518 | 1522 | 1563 | 1631 | 1634 | 1667 | 1673 | 1708 | 2975 | 2992 | 3004 | 3008 | 3017 |
|              | 3020 | 3042 | 3044 | 3048 | 3063 | 3079 | 3098 | 3103 | 3112 | 3124 | 3151 | 3165 | 3166 | 3176 |
|              | 3214 | 3225 | 3277 | 3791 | 3792 | 3796 | 3833 |      |      |      |      |      |      |      |
| <b>1b1'</b>  | 14   | 21   | 24   | 31   | 36   | 56   | 67   | 77   | 88   | 104  | 112  | 121  | 130  |      |
|              | 135  | 150  | 151  | 156  | 168  | 178  | 188  | 219  | 232  | 234  | 242  | 247  | 266  | 273  |
|              | 285  | 296  | 302  | 307  | 334  | 337  | 357  | 363  | 375  | 390  | 396  | 418  | 424  | 428  |
|              | 433  | 435  | 439  | 445  | 470  | 473  | 485  | 516  | 518  | 524  | 546  | 556  | 573  | 589  |
|              | 602  | 614  | 641  | 649  | 655  | 683  | 704  | 716  | 734  | 738  | 770  | 799  | 825  | 829  |
|              | 846  | 849  | 873  | 910  | 918  | 937  | 954  | 962  | 964  | 991  | 1014 | 1024 | 1028 | 1030 |
|              | 1055 | 1057 | 1060 | 1064 | 1069 | 1074 | 1076 | 1079 | 1092 | 1096 | 1120 | 1123 | 1138 | 1138 |
|              | 1158 | 1172 | 1178 | 1187 | 1200 | 1209 | 1211 | 1214 | 1234 | 1238 | 1257 | 1261 | 1274 | 1278 |
|              | 1325 | 1327 | 1337 | 1345 | 1355 | 1357 | 1372 | 1374 | 1376 | 1380 | 1383 | 1400 | 1408 | 1417 |
|              | 1427 | 1430 | 1438 | 1446 | 1454 | 1456 | 1460 | 1465 | 1472 | 1486 | 1489 | 1499 | 1502 | 1505 |
|              | 1512 | 1519 | 1524 | 1563 | 1626 | 1633 | 1666 | 1673 | 1709 | 2976 | 2995 | 3006 | 3017 | 3017 |
|              | 3032 | 3042 | 3048 | 3054 | 3064 | 3079 | 3095 | 3098 | 3108 | 3126 | 3151 | 3168 | 3176 | 3183 |
|              | 3214 | 3226 | 3290 | 3791 | 3793 | 3795 | 3832 |      |      |      |      |      |      |      |
| <b>1b1''</b> | 15   | 20   | 22   | 33   | 37   | 52   | 63   | 77   | 87   | 99   | 106  | 114  | 120  |      |
|              | 131  | 145  | 151  | 155  | 169  | 172  | 182  | 222  | 230  | 238  | 243  | 244  | 264  | 273  |
|              | 286  | 296  | 298  | 312  | 328  | 340  | 347  | 366  | 379  | 388  | 393  | 417  | 420  | 424  |
|              | 431  | 434  | 438  | 439  | 467  | 479  | 486  | 511  | 523  | 523  | 546  | 553  | 566  | 591  |
|              | 604  | 614  | 640  | 651  | 660  | 681  | 711  | 717  | 732  | 739  | 761  | 799  | 828  | 832  |
|              | 846  | 861  | 872  | 903  | 918  | 933  | 954  | 961  | 967  | 989  | 1014 | 1024 | 1030 | 1031 |
|              | 1046 | 1059 | 1066 | 1067 | 1068 | 1074 | 1074 | 1076 | 1090 | 1098 | 1120 | 1125 | 1138 | 1138 |
|              | 1161 | 1173 | 1178 | 1192 | 1201 | 1209 | 1211 | 1217 | 1233 | 1238 | 1257 | 1268 | 1274 | 1279 |



|            |                                                                                                                                                                                                                                                                                                                                                                                                                                                                                                                                                                                                                                                                                                                                                                                                                                                                                  |
|------------|----------------------------------------------------------------------------------------------------------------------------------------------------------------------------------------------------------------------------------------------------------------------------------------------------------------------------------------------------------------------------------------------------------------------------------------------------------------------------------------------------------------------------------------------------------------------------------------------------------------------------------------------------------------------------------------------------------------------------------------------------------------------------------------------------------------------------------------------------------------------------------|
|            | 1327 1330 1338 1342 1351 1354 1371 1375 1379 1379 1381 1404 1409 1417 1422<br>1424 1427 1439 1443 1451 1459 1461 1466 1476 1488 1490 1496 1500 1504 1510<br>1514 1518 1528 1562 1628 1633 1667 1673 1707 2975 2988 3007 3012 3016 3024<br>3026 3034 3047 3063 3065 3079 3099 3112 3125 3127 3151 3160 3168 3176 3203<br>3213 3225 3255 3790 3796 3798 3830                                                                                                                                                                                                                                                                                                                                                                                                                                                                                                                       |
| <b>1b2</b> | 16 20 22 31 39 47 69 73 87 100 105 116 131<br>133 149 152 156 159 178 194 217 223 236 241 247 263 273<br>280 294 303 317 322 341 351 367 375 385 400 408 421 424<br>429 434 441 450 461 471 489 513 523 527 542 554 573 593<br>599 617 636 653 675 686 693 718 734 739 746 802 828 841<br>848 851 874 907 919 936 952 961 962 1006 1021 1025 1026 1030<br>1058 1062 1064 1072 1073 1074 1075 1076 1097 1104 1118 1127 1137 1139 1145<br>1156 1174 1178 1198 1201 1211 1211 1218 1234 1238 1258 1260 1273 1278 1299<br>1324 1330 1338 1350 1353 1356 1368 1373 1377 1379 1381 1401 1408 1418 1423<br>1427 1431 1440 1447 1451 1459 1461 1467 1478 1487 1489 1504 1506 1509 1513<br>1519 1520 1528 1563 1629 1633 1667 1673 1706 2976 2994 3008 3014 3017 3021<br>3027 3034 3047 3053 3063 3079 3099 3112 3115 3124 3151 3165 3165 3176 3200<br>3214 3226 3266 3791 3793 3796 3832 |

**Table S14.** Frequencies of Compound **2** at the B3LYP/6-31G\*\* Level in the Gas Phase (cm<sup>-1</sup>).

| species     | frequencies |    |     |     |     |     |     |     |     |     |     |     |     |     |     |     |      |      |      |      |      |      |      |      |      |      |      |      |      |      |      |      |      |      |      |      |      |      |      |      |      |      |      |      |      |      |      |      |      |      |      |      |      |      |      |      |      |      |      |      |      |      |      |      |      |      |      |      |      |      |      |      |      |      |      |      |      |      |      |      |      |      |      |      |      |      |      |      |      |      |      |      |      |      |      |      |      |      |      |      |      |      |      |      |      |      |      |      |      |      |      |      |      |      |      |      |      |      |      |      |      |      |      |      |      |      |      |      |      |      |       |       |       |       |       |       |       |       |       |       |       |       |       |       |       |       |       |       |       |       |       |       |       |       |       |       |       |       |       |       |       |       |       |       |       |       |       |       |       |       |       |       |       |       |       |       |       |       |       |       |       |       |       |       |       |       |       |       |       |       |       |       |       |       |       |       |       |       |       |       |       |       |       |       |       |       |       |       |       |       |       |       |       |       |       |       |       |       |       |       |       |       |       |       |       |       |       |       |       |       |       |       |       |       |       |       |       |       |       |       |       |       |       |       |       |       |       |       |       |       |       |       |       |       |       |       |       |       |       |       |       |       |       |       |
|-------------|-------------|----|-----|-----|-----|-----|-----|-----|-----|-----|-----|-----|-----|-----|-----|-----|------|------|------|------|------|------|------|------|------|------|------|------|------|------|------|------|------|------|------|------|------|------|------|------|------|------|------|------|------|------|------|------|------|------|------|------|------|------|------|------|------|------|------|------|------|------|------|------|------|------|------|------|------|------|------|------|------|------|------|------|------|------|------|------|------|------|------|------|------|------|------|------|------|------|------|------|------|------|------|------|------|------|------|------|------|------|------|------|------|------|------|------|------|------|------|------|------|------|------|------|------|------|------|------|------|------|------|------|------|------|------|------|------|------|-------|-------|-------|-------|-------|-------|-------|-------|-------|-------|-------|-------|-------|-------|-------|-------|-------|-------|-------|-------|-------|-------|-------|-------|-------|-------|-------|-------|-------|-------|-------|-------|-------|-------|-------|-------|-------|-------|-------|-------|-------|-------|-------|-------|-------|-------|-------|-------|-------|-------|-------|-------|-------|-------|-------|-------|-------|-------|-------|-------|-------|-------|-------|-------|-------|-------|-------|-------|-------|-------|-------|-------|-------|-------|-------|-------|-------|-------|-------|-------|-------|-------|-------|-------|-------|-------|-------|-------|-------|-------|-------|-------|-------|-------|-------|-------|-------|-------|-------|-------|-------|-------|-------|-------|-------|-------|-------|-------|-------|-------|-------|-------|-------|-------|-------|-------|-------|-------|-------|-------|-------|-------|-------|-------|-------|-------|-------|-------|-------|-------|-------|-------|-------|-------|
| <b>2a1</b>  | 6.          | 9. | 16. | 20. | 23. | 36. | 38. | 43. | 46. | 61. | 69. | 77. | 79. | 82. | 87. | 91. | 101. | 103. | 116. | 119. | 128. | 145. | 148. | 150. | 154. | 158. | 163. | 176. | 180. | 181. | 196. | 196. | 202. | 213. | 228. | 235. | 238. | 243. | 256. | 259. | 272. | 275. | 289. | 294. | 296. | 297. | 302. | 309. | 320. | 321. | 326. | 329. | 338. | 348. | 356. | 357. | 360. | 362. | 368. | 378. | 386. | 390. | 405. | 416. | 420. | 424. | 433. | 434. | 436. | 446. | 457. | 470. | 474. | 481. | 489. | 489. | 499. | 518. | 522. | 525. | 538. | 541. | 550. | 555. | 557. | 563. | 568. | 579. | 593. | 601. | 605. | 614. | 625. | 633. | 637. | 652. | 656. | 673. | 680. | 681. | 684. | 685. | 703. | 719. | 728. | 739. | 744. | 747. | 752. | 770. | 787. | 801. | 805. | 829. | 838. | 839. | 842. | 847. | 855. | 864. | 874. | 886. | 917. | 918. | 937. | 954. | 961. | 966. | 972. | 996. | 1001. | 1017. | 1020. | 1025. | 1030. | 1039. | 1058. | 1060. | 1062. | 1065. | 1068. | 1074. | 1075. | 1091. | 1102. | 1105. | 1117. | 1127. | 1138. | 1146. | 1155. | 1158. | 1162. | 1168. | 1176. | 1178. | 1179. | 1193. | 1200. | 1201. | 1211. | 1213. | 1216. | 1220. | 1224. | 1239. | 1247. | 1249. | 1255. | 1278. | 1278. | 1295. | 1299. | 1308. | 1324. | 1329. | 1330. | 1331. | 1338. | 1340. | 1345. | 1350. | 1356. | 1360. | 1367. | 1380. | 1381. | 1384. | 1388. | 1391. | 1396. | 1404. | 1405. | 1407. | 1416. | 1421. | 1422. | 1427. | 1433. | 1442. | 1454. | 1459. | 1464. | 1467. | 1476. | 1487. | 1489. | 1493. | 1496. | 1501. | 1505. | 1505. | 1516. | 1517. | 1519. | 1525. | 1555. | 1556. | 1563. | 1632. | 1634. | 1646. | 1655. | 1667. | 1670. | 1673. | 1678. | 1708. | 1776. | 1823. | 2987. | 2993. | 3002. | 3005. | 3017. | 3029. | 3042. | 3047. | 3050. | 3079. | 3098. | 3099. | 3103. | 3113. | 3124. | 3151. | 3165. | 3167. | 3176. | 3185. | 3201. | 3204. | 3214. | 3226. | 3226. | 3280. | 3627. | 3705. | 3744. | 3761. | 3772. | 3779. | 3793. | 3839. |
| <b>2a1'</b> | 7           | 10 | 13  | 21  | 31  | 33  | 40  | 45  | 56  | 58  | 71  | 78  | 83  | 93  | 95  | 102 | 107  | 120  | 121  | 128  | 137  | 146  | 149  | 152  | 153  | 166  | 168  |      |      |      |      |      |      |      |      |      |      |      |      |      |      |      |      |      |      |      |      |      |      |      |      |      |      |      |      |      |      |      |      |      |      |      |      |      |      |      |      |      |      |      |      |      |      |      |      |      |      |      |      |      |      |      |      |      |      |      |      |      |      |      |      |      |      |      |      |      |      |      |      |      |      |      |      |      |      |      |      |      |      |      |      |      |      |      |      |      |      |      |      |      |      |      |      |      |      |      |      |      |      |      |       |       |       |       |       |       |       |       |       |       |       |       |       |       |       |       |       |       |       |       |       |       |       |       |       |       |       |       |       |       |       |       |       |       |       |       |       |       |       |       |       |       |       |       |       |       |       |       |       |       |       |       |       |       |       |       |       |       |       |       |       |       |       |       |       |       |       |       |       |       |       |       |       |       |       |       |       |       |       |       |       |       |       |       |       |       |       |       |       |       |       |       |       |       |       |       |       |       |       |       |       |       |       |       |       |       |       |       |       |       |       |       |       |       |       |       |       |       |       |       |       |       |       |       |       |       |       |       |       |       |       |       |       |       |

|              |      |      |      |      |      |      |      |      |      |      |      |      |      |      |
|--------------|------|------|------|------|------|------|------|------|------|------|------|------|------|------|
|              | 174  | 180  | 182  | 195  | 198  | 203  | 222  | 229  | 235  | 240  | 244  | 253  | 260  | 272  |
|              | 280  | 288  | 295  | 297  | 297  | 304  | 310  | 320  | 323  | 328  | 331  | 345  | 349  | 353  |
|              | 358  | 362  | 365  | 370  | 379  | 384  | 388  | 408  | 419  | 424  | 426  | 431  | 434  | 435  |
|              | 451  | 461  | 469  | 482  | 487  | 488  | 490  | 505  | 512  | 522  | 523  | 538  | 541  | 549  |
|              | 556  | 558  | 561  | 567  | 580  | 593  | 599  | 605  | 614  | 625  | 634  | 639  | 648  | 653  |
|              | 658  | 680  | 681  | 684  | 685  | 702  | 714  | 733  | 739  | 744  | 749  | 761  | 773  | 789  |
|              | 799  | 805  | 825  | 829  | 839  | 843  | 846  | 855  | 863  | 872  | 888  | 916  | 918  | 939  |
|              | 954  | 960  | 966  | 976  | 987  | 1000 | 1011 | 1021 | 1024 | 1030 | 1042 | 1055 | 1061 | 1067 |
|              | 1072 | 1075 | 1077 | 1083 | 1090 | 1100 | 1114 | 1130 | 1137 | 1141 | 1147 | 1158 | 1161 | 1176 |
|              | 1178 | 1179 | 1190 | 1200 | 1200 | 1210 | 1211 | 1215 | 1222 | 1225 | 1238 | 1248 | 1251 | 1278 |
|              | 1278 | 1293 | 1299 | 1307 | 1324 | 1328 | 1329 | 1331 | 1334 | 1337 | 1344 | 1350 | 1355 | 1377 |
|              | 1379 | 1380 | 1385 | 1389 | 1392 | 1394 | 1400 | 1404 | 1407 | 1414 | 1419 | 1422 | 1426 | 1443 |
|              | 1452 | 1460 | 1461 | 1466 | 1472 | 1483 | 1489 | 1494 | 1500 | 1502 | 1504 | 1507 | 1511 | 1519 |
|              | 1519 | 1555 | 1557 | 1563 | 1628 | 1633 | 1646 | 1655 | 1666 | 1671 | 1673 | 1678 | 1706 | 1823 |
|              | 2990 | 2999 | 3006 | 3016 | 3018 | 3032 | 3043 | 3047 | 3055 | 3080 | 3094 | 3098 | 3108 | 3123 |
|              | 3152 | 3163 | 3169 | 3173 | 3183 | 3203 | 3204 | 3213 | 3225 | 3225 | 3283 | 3628 | 3709 | 3760 |
|              | 3772 | 3779 | 3792 | 3841 |      |      |      |      |      |      |      |      |      |      |
| <b>2a1''</b> | 11   | 17   | 23   | 28   | 35   | 40   | 43   | 50   | 57   | 63   | 73   | 79   | 82   |      |
|              | 86   | 90   | 97   | 98   | 117  | 121  | 125  | 141  | 147  | 154  | 156  | 158  | 167  | 175  |
|              | 181  | 190  | 196  | 199  | 210  | 222  | 233  | 238  | 241  | 250  | 255  | 259  | 270  | 282  |
|              | 287  | 297  | 298  | 299  | 303  | 308  | 311  | 323  | 326  | 329  | 338  | 350  | 351  | 352  |
|              | 359  | 363  | 364  | 379  | 383  | 385  | 390  | 409  | 419  | 424  | 428  | 433  | 438  | 439  |
|              | 452  | 462  | 468  | 480  | 488  | 491  | 497  | 505  | 510  | 522  | 524  | 540  | 541  | 551  |
|              | 556  | 559  | 560  | 573  | 581  | 595  | 603  | 606  | 617  | 625  | 634  | 636  | 647  | 653  |
|              | 658  | 680  | 681  | 684  | 686  | 704  | 716  | 732  | 739  | 745  | 751  | 765  | 773  | 789  |
|              | 802  | 806  | 823  | 833  | 841  | 843  | 846  | 848  | 865  | 875  | 889  | 913  | 919  | 936  |
|              | 950  | 963  | 964  | 971  | 988  | 996  | 1011 | 1020 | 1024 | 1029 | 1038 | 1057 | 1059 | 1064 |
|              | 1070 | 1071 | 1075 | 1081 | 1089 | 1098 | 1110 | 1127 | 1136 | 1143 | 1147 | 1158 | 1159 | 1169 |
|              | 1176 | 1177 | 1186 | 1200 | 1201 | 1209 | 1210 | 1214 | 1223 | 1225 | 1242 | 1247 | 1254 | 1276 |
|              | 1277 | 1291 | 1302 | 1305 | 1321 | 1328 | 1329 | 1329 | 1335 | 1337 | 1343 | 1350 | 1354 | 1372 |
|              | 1377 | 1380 | 1384 | 1386 | 1391 | 1393 | 1396 | 1403 | 1409 | 1413 | 1418 | 1421 | 1427 | 1442 |
|              | 1451 | 1459 | 1463 | 1465 | 1469 | 1484 | 1488 | 1491 | 1494 | 1498 | 1501 | 1505 | 1506 | 1517 |
|              | 1519 | 1554 | 1556 | 1563 | 1625 | 1631 | 1645 | 1652 | 1665 | 1669 | 1670 | 1677 | 1708 | 1821 |
|              | 2987 | 3001 | 3003 | 3021 | 3031 | 3040 | 3048 | 3058 | 3060 | 3085 | 3099 | 3112 | 3113 | 3121 |
|              | 3156 | 3164 | 3178 | 3180 | 3190 | 3201 | 3208 | 3213 | 3225 | 3226 | 3309 | 3628 | 3702 | 3761 |
|              | 3771 | 3781 | 3790 | 3790 |      |      |      |      |      |      |      |      |      |      |
| <b>2a2</b>   | 8    | 12   | 12   | 20   | 28   | 32   | 42   | 45   | 54   | 56   | 71   | 78   | 80   |      |
|              | 85   | 91   | 101  | 105  | 115  | 121  | 133  | 140  | 145  | 149  | 151  | 156  | 160  | 161  |
|              | 174  | 179  | 186  | 194  | 200  | 210  | 217  | 224  | 235  | 240  | 245  | 257  | 261  | 274  |
|              | 280  | 286  | 295  | 296  | 296  | 303  | 313  | 319  | 321  | 324  | 329  | 336  | 348  | 350  |
|              | 357  | 361  | 366  | 368  | 372  | 383  | 390  | 408  | 418  | 424  | 425  | 430  | 434  | 437  |
|              | 446  | 464  | 470  | 479  | 483  | 487  | 489  | 497  | 520  | 522  | 524  | 538  | 539  | 549  |
|              | 554  | 557  | 559  | 571  | 579  | 592  | 603  | 608  | 614  | 625  | 632  | 637  | 653  | 656  |
|              | 675  | 677  | 680  | 685  | 685  | 699  | 709  | 733  | 736  | 742  | 744  | 751  | 770  | 788  |
|              | 800  | 805  | 829  | 836  | 842  | 844  | 848  | 864  | 869  | 874  | 886  | 916  | 919  | 937  |
|              | 955  | 962  | 968  | 974  | 998  | 999  | 1020 | 1021 | 1025 | 1031 | 1043 | 1060 | 1064 | 1071 |

|             |      |      |      |      |      |      |      |      |      |      |      |      |      |      |      |
|-------------|------|------|------|------|------|------|------|------|------|------|------|------|------|------|------|
|             | 1073 | 1077 | 1077 | 1087 | 1098 | 1101 | 1120 | 1126 | 1138 | 1144 | 1152 | 1158 | 1162 | 1169 | 1173 |
|             | 1178 | 1178 | 1197 | 1200 | 1202 | 1211 | 1214 | 1218 | 1220 | 1224 | 1238 | 1247 | 1248 | 1255 | 1278 |
|             | 1280 | 1295 | 1299 | 1308 | 1324 | 1328 | 1329 | 1332 | 1335 | 1337 | 1345 | 1350 | 1355 | 1361 | 1372 |
|             | 1380 | 1381 | 1382 | 1388 | 1392 | 1394 | 1400 | 1404 | 1409 | 1416 | 1421 | 1423 | 1428 | 1432 | 1442 |
|             | 1452 | 1459 | 1462 | 1466 | 1478 | 1488 | 1490 | 1493 | 1499 | 1504 | 1508 | 1513 | 1515 | 1519 | 1520 |
|             | 1523 | 1555 | 1557 | 1563 | 1630 | 1634 | 1646 | 1655 | 1668 | 1670 | 1673 | 1678 | 1703 | 1776 | 1823 |
|             | 2992 | 3001 | 3007 | 3016 | 3016 | 3030 | 3036 | 3047 | 3051 | 3079 | 3099 | 3110 | 3112 | 3117 | 3123 |
|             | 3150 | 3164 | 3165 | 3167 | 3176 | 3202 | 3204 | 3213 | 3225 | 3226 | 3237 | 3627 | 3702 | 3744 | 3761 |
|             | 3773 | 3780 | 3793 | 3840 |      |      |      |      |      |      |      |      |      |      |      |
| <b>2b1</b>  | 7    | 8    | 13   | 23   | 26   | 35   | 40   | 44   | 46   | 62   | 70   | 74   | 80   |      |      |
|             | 81   | 85   | 88   | 99   | 105  | 118  | 120  | 131  | 143  | 147  | 153  | 156  | 163  | 170  |      |
|             | 177  | 180  | 185  | 195  | 196  | 201  | 219  | 225  | 232  | 238  | 246  | 255  | 258  | 274  |      |
|             | 279  | 291  | 293  | 296  | 297  | 303  | 309  | 319  | 320  | 325  | 328  | 331  | 345  | 354  |      |
|             | 358  | 361  | 365  | 367  | 379  | 384  | 391  | 408  | 417  | 421  | 425  | 432  | 432  | 436  |      |
|             | 445  | 460  | 471  | 476  | 480  | 485  | 487  | 497  | 520  | 522  | 526  | 538  | 539  | 550  |      |
|             | 555  | 556  | 561  | 568  | 579  | 593  | 601  | 605  | 616  | 623  | 632  | 637  | 651  | 656  |      |
|             | 673  | 680  | 683  | 685  | 687  | 704  | 713  | 727  | 739  | 744  | 747  | 752  | 770  | 787  |      |
|             | 800  | 805  | 829  | 838  | 842  | 843  | 848  | 861  | 863  | 873  | 887  | 916  | 918  | 936  |      |
|             | 955  | 962  | 967  | 972  | 995  | 999  | 1019 | 1020 | 1025 | 1031 | 1038 | 1059 | 1060 | 1062 | 1068 |
|             | 1071 | 1073 | 1076 | 1091 | 1102 | 1105 | 1117 | 1127 | 1138 | 1147 | 1153 | 1158 | 1162 | 1169 | 1174 |
|             | 1178 | 1179 | 1193 | 1199 | 1201 | 1211 | 1213 | 1216 | 1221 | 1225 | 1237 | 1247 | 1249 | 1254 | 1278 |
|             | 1279 | 1295 | 1299 | 1309 | 1324 | 1327 | 1330 | 1332 | 1337 | 1343 | 1344 | 1350 | 1355 | 1362 | 1370 |
|             | 1380 | 1381 | 1382 | 1388 | 1391 | 1394 | 1403 | 1406 | 1408 | 1415 | 1421 | 1422 | 1427 | 1433 | 1443 |
|             | 1456 | 1459 | 1465 | 1467 | 1480 | 1487 | 1489 | 1494 | 1498 | 1505 | 1505 | 1514 | 1515 | 1516 | 1518 |
|             | 1519 | 1555 | 1557 | 1563 | 1632 | 1634 | 1646 | 1655 | 1668 | 1671 | 1673 | 1678 | 1706 | 1775 | 1822 |
|             | 2988 | 2995 | 3008 | 3009 | 3016 | 3031 | 3041 | 3047 | 3061 | 3078 | 3097 | 3104 | 3111 | 3117 | 3124 |
|             | 3150 | 3163 | 3163 | 3164 | 3177 | 3201 | 3204 | 3214 | 3225 | 3226 | 3263 | 3629 | 3704 | 3745 | 3761 |
|             | 3774 | 3780 | 3792 | 3840 |      |      |      |      |      |      |      |      |      |      |      |
| <b>2b1'</b> | 6    | 6    | 15   | 21   | 29   | 33   | 36   | 45   | 56   | 61   | 71   | 78   | 84   |      |      |
|             | 86   | 93   | 100  | 109  | 119  | 123  | 130  | 144  | 146  | 149  | 151  | 157  | 163  | 167  |      |
|             | 172  | 180  | 180  | 195  | 197  | 204  | 224  | 230  | 235  | 241  | 244  | 252  | 259  | 270  |      |
|             | 279  | 289  | 295  | 296  | 297  | 305  | 306  | 320  | 323  | 328  | 331  | 337  | 348  | 355  |      |
|             | 357  | 361  | 362  | 366  | 375  | 383  | 389  | 410  | 418  | 424  | 426  | 430  | 435  | 436  |      |
|             | 450  | 464  | 470  | 484  | 485  | 486  | 491  | 505  | 516  | 520  | 523  | 538  | 539  | 548  |      |
|             | 556  | 557  | 561  | 567  | 580  | 593  | 599  | 605  | 614  | 623  | 633  | 640  | 647  | 654  |      |
|             | 657  | 680  | 681  | 684  | 685  | 701  | 713  | 733  | 738  | 744  | 749  | 762  | 773  | 789  |      |
|             | 799  | 805  | 824  | 830  | 839  | 843  | 846  | 849  | 864  | 873  | 888  | 916  | 918  | 938  |      |
|             | 954  | 962  | 964  | 976  | 990  | 999  | 1012 | 1021 | 1024 | 1030 | 1042 | 1056 | 1059 | 1060 | 1066 |
|             | 1072 | 1075 | 1075 | 1082 | 1088 | 1099 | 1113 | 1130 | 1138 | 1138 | 1147 | 1158 | 1162 | 1167 | 1175 |
|             | 1177 | 1180 | 1188 | 1200 | 1201 | 1210 | 1211 | 1215 | 1219 | 1224 | 1238 | 1248 | 1251 | 1254 | 1278 |
|             | 1279 | 1293 | 1298 | 1306 | 1324 | 1327 | 1328 | 1329 | 1335 | 1338 | 1346 | 1350 | 1355 | 1361 | 1375 |
|             | 1377 | 1380 | 1383 | 1388 | 1392 | 1396 | 1399 | 1403 | 1407 | 1413 | 1418 | 1420 | 1425 | 1432 | 1440 |
|             | 1451 | 1460 | 1461 | 1465 | 1471 | 1485 | 1488 | 1494 | 1495 | 1499 | 1503 | 1503 | 1507 | 1515 | 1518 |
|             | 1523 | 1555 | 1557 | 1563 | 1626 | 1633 | 1646 | 1655 | 1666 | 1671 | 1673 | 1678 | 1706 | 1776 | 1823 |
|             | 2991 | 3004 | 3005 | 3016 | 3020 | 3033 | 3042 | 3046 | 3055 | 3079 | 3095 | 3099 | 3108 | 3112 | 3124 |
|             | 3151 | 3163 | 3169 | 3176 | 3188 | 3205 | 3205 | 3214 | 3225 | 3226 | 3295 | 3626 | 3705 | 3744 | 3761 |

|              |      |      |      |      |      |      |      |      |      |      |      |      |      |      |
|--------------|------|------|------|------|------|------|------|------|------|------|------|------|------|------|
|              | 3774 | 3780 | 3793 | 3838 |      |      |      |      |      |      |      |      |      |      |
| <b>2b1''</b> | 5    | 11   | 14   | 25   | 27   | 35   | 42   | 43   | 47   | 66   | 70   | 77   | 84   |      |
|              | 84   | 89   | 97   | 106  | 116  | 118  | 120  | 125  | 130  | 146  | 150  | 154  | 162  | 166  |
|              | 172  | 179  | 180  | 193  | 197  | 209  | 225  | 232  | 234  | 241  | 246  | 257  | 258  | 276  |
|              | 285  | 289  | 295  | 296  | 297  | 304  | 307  | 319  | 320  | 325  | 328  | 335  | 341  | 348  |
|              | 358  | 363  | 366  | 369  | 379  | 383  | 389  | 413  | 420  | 421  | 424  | 431  | 435  | 436  |
|              | 449  | 464  | 471  | 480  | 483  | 489  | 490  | 506  | 514  | 522  | 524  | 534  | 538  | 549  |
|              | 553  | 557  | 560  | 571  | 578  | 596  | 599  | 605  | 617  | 623  | 633  | 639  | 649  | 656  |
|              | 658  | 679  | 680  | 683  | 685  | 703  | 714  | 730  | 738  | 744  | 750  | 760  | 771  | 788  |
|              | 799  | 805  | 830  | 832  | 837  | 843  | 847  | 861  | 864  | 872  | 887  | 916  | 920  | 936  |
|              | 956  | 962  | 966  | 971  | 986  | 997  | 1011 | 1019 | 1025 | 1031 | 1038 | 1059 | 1061 | 1062 |
|              | 1070 | 1074 | 1076 | 1083 | 1093 | 1101 | 1115 | 1129 | 1138 | 1146 | 1151 | 1158 | 1162 | 1167 |
|              | 1178 | 1180 | 1193 | 1200 | 1201 | 1211 | 1212 | 1214 | 1222 | 1224 | 1238 | 1248 | 1254 | 1256 |
|              | 1280 | 1293 | 1298 | 1307 | 1324 | 1327 | 1328 | 1331 | 1336 | 1339 | 1344 | 1350 | 1354 | 1360 |
|              | 1379 | 1380 | 1382 | 1388 | 1392 | 1393 | 1400 | 1402 | 1407 | 1414 | 1419 | 1421 | 1425 | 1433 |
|              | 1451 | 1460 | 1463 | 1466 | 1476 | 1488 | 1490 | 1494 | 1494 | 1501 | 1501 | 1505 | 1511 | 1515 |
|              | 1526 | 1555 | 1557 | 1563 | 1628 | 1633 | 1646 | 1654 | 1668 | 1671 | 1673 | 1678 | 1705 | 1774 |
|              | 2985 | 3001 | 3005 | 3010 | 3017 | 3030 | 3047 | 3048 | 3063 | 3079 | 3099 | 3112 | 3115 | 3123 |
|              | 3150 | 3162 | 3164 | 3174 | 3175 | 3204 | 3205 | 3213 | 3225 | 3226 | 3248 | 3629 | 3696 | 3744 |
|              | 3772 | 3780 | 3791 | 3838 |      |      |      |      |      |      |      |      |      |      |
| <b>2b2</b>   | 8    | 9    | 16   | 20   | 28   | 30   | 37   | 45   | 55   | 58   | 71   | 79   | 81   |      |
|              | 85   | 92   | 102  | 105  | 118  | 121  | 126  | 138  | 142  | 150  | 153  | 156  | 161  | 163  |
|              | 170  | 179  | 186  | 193  | 198  | 215  | 221  | 228  | 232  | 240  | 247  | 257  | 261  | 273  |
|              | 278  | 283  | 294  | 296  | 296  | 302  | 313  | 320  | 323  | 325  | 329  | 333  | 344  | 347  |
|              | 357  | 361  | 366  | 367  | 376  | 384  | 391  | 405  | 417  | 424  | 425  | 431  | 432  | 437  |
|              | 446  | 467  | 471  | 481  | 484  | 486  | 490  | 494  | 517  | 522  | 526  | 535  | 538  | 550  |
|              | 554  | 557  | 559  | 574  | 580  | 592  | 604  | 607  | 616  | 625  | 632  | 638  | 651  | 656  |
|              | 674  | 680  | 682  | 685  | 688  | 693  | 704  | 734  | 738  | 744  | 745  | 751  | 769  | 788  |
|              | 802  | 805  | 829  | 838  | 840  | 843  | 847  | 853  | 864  | 874  | 887  | 916  | 920  | 937  |
|              | 953  | 961  | 962  | 973  | 998  | 1005 | 1019 | 1021 | 1024 | 1030 | 1043 | 1061 | 1064 | 1070 |
|              | 1073 | 1074 | 1076 | 1087 | 1097 | 1102 | 1120 | 1126 | 1138 | 1143 | 1151 | 1157 | 1161 | 1169 |
|              | 1178 | 1179 | 1198 | 1200 | 1202 | 1211 | 1215 | 1217 | 1220 | 1224 | 1239 | 1247 | 1249 | 1255 |
|              | 1279 | 1294 | 1299 | 1307 | 1324 | 1327 | 1328 | 1330 | 1335 | 1339 | 1349 | 1350 | 1355 | 1361 |
|              | 1379 | 1381 | 1382 | 1389 | 1392 | 1395 | 1398 | 1405 | 1408 | 1416 | 1421 | 1423 | 1426 | 1433 |
|              | 1452 | 1460 | 1462 | 1466 | 1478 | 1487 | 1488 | 1494 | 1499 | 1504 | 1506 | 1509 | 1516 | 1519 |
|              | 1528 | 1555 | 1557 | 1563 | 1629 | 1633 | 1646 | 1655 | 1667 | 1671 | 1673 | 1678 | 1706 | 1776 |
|              | 2989 | 3001 | 3008 | 3016 | 3017 | 3029 | 3033 | 3048 | 3053 | 3079 | 3099 | 3111 | 3113 | 3116 |
|              | 3151 | 3163 | 3164 | 3165 | 3177 | 3200 | 3205 | 3213 | 3224 | 3226 | 3265 | 3626 | 3703 | 3743 |
|              | 3773 | 3780 | 3792 | 3840 |      |      |      |      |      |      |      |      |      |      |

**Table S15.** Frequencies of Compound **3** at the B3LYP/6-31G\*\* Level in the Gas Phase (cm<sup>-1</sup>).

| species    | frequencies |    |     |     |     |     |     |     |     |     |     |     |     |
|------------|-------------|----|-----|-----|-----|-----|-----|-----|-----|-----|-----|-----|-----|
| <b>3a1</b> | 6.          | 9. | 16. | 22. | 29. | 31. | 39. | 44. | 50. | 57. | 76. | 82. | 85. |

|            |       |       |       |       |       |       |       |       |       |       |       |       |       |
|------------|-------|-------|-------|-------|-------|-------|-------|-------|-------|-------|-------|-------|-------|
|            | 88.   | 90.   | 94.   | 96.   | 102.  | 111.  | 114.  | 123.  | 141.  | 146.  | 149.  | 150.  | 157.  |
|            | 163.  | 174.  | 180.  | 182.  | 187.  | 194.  | 208.  | 213.  | 226.  | 235.  | 241.  | 244.  |       |
|            | 257.  | 262.  | 269.  | 271.  | 290.  | 293.  | 294.  | 297.  | 304.  | 307.  | 312.  | 321.  |       |
|            | 328.  | 333.  | 336.  | 346.  | 352.  | 353.  | 357.  | 362.  | 362.  | 369.  | 380.  | 389.  |       |
|            | 390.  | 405.  | 420.  | 424.  | 425.  | 429.  | 436.  | 443.  | 452.  | 468.  | 478.  | 480.  |       |
|            | 490.  | 493.  | 500.  | 510.  | 519.  | 523.  | 534.  | 542.  | 551.  | 554.  | 556.  | 561.  |       |
|            | 572.  | 575.  | 592.  | 597.  | 606.  | 616.  | 624.  | 635.  | 639.  | 643.  | 652.  | 656.  |       |
|            | 678.  | 681.  | 687.  | 687.  | 696.  | 718.  | 730.  | 739.  | 740.  | 746.  | 750.  | 783.  |       |
|            | 791.  | 801.  | 807.  | 829.  | 835.  | 839.  | 841.  | 847.  | 854.  | 867.  | 874.  | 878.  |       |
|            | 917.  | 920.  | 934.  | 954.  | 962.  | 966.  | 972.  | 994.  | 1005. | 1021. | 1025. | 1030. | 1043. |
|            | 1048. | 1057. | 1058. | 1059. | 1063. | 1068. | 1074. | 1075. | 1079. | 1099. | 1102. | 1105. | 1124. |
|            | 1141. | 1145. | 1156. | 1158. | 1165. | 1175. | 1177. | 1180. | 1194. | 1199. | 1200. | 1210. | 1214. |
|            | 1225. | 1229. | 1235. | 1239. | 1248. | 1250. | 1274. | 1279. | 1285. | 1294. | 1299. | 1321. | 1327. |
|            | 1329. | 1337. | 1338. | 1338. | 1344. | 1345. | 1355. | 1358. | 1360. | 1374. | 1380. | 1382. | 1383. |
|            | 1388. | 1393. | 1397. | 1404. | 1407. | 1412. | 1418. | 1420. | 1427. | 1436. | 1442. | 1451. | 1459. |
|            | 1461. | 1466. | 1475. | 1485. | 1486. | 1488. | 1496. | 1504. | 1504. | 1504. | 1508. | 1517. | 1518. |
|            | 1523. | 1554. | 1557. | 1563. | 1632. | 1634. | 1647. | 1658. | 1667. | 1671. | 1673. | 1681. | 1708. |
|            | 1795. | 1827. | 2965. | 3005. | 3009. | 3017. | 3042. | 3048. | 3049. | 3052. | 3065. | 3080. | 3093. |
|            | 3102. | 3103. | 3108. | 3125. | 3151. | 3155. | 3168. | 3175. | 3182. | 3202. | 3205. | 3213. | 3225. |
|            | 3237. | 3283. | 3604. | 3729. | 3754. | 3769. | 3780. | 3782. | 3795. | 3840. |       |       |       |
| <b>3b1</b> | 7     | 9     | 12    | 22    | 29    | 33    | 38    | 45    | 51    | 58    | 76    | 81    | 84    |
|            | 86    | 88    | 90    | 95    | 101   | 109   | 115   | 129   | 143   | 147   | 151   | 153   | 166   |
|            | 171   | 180   | 182   | 188   | 194   | 208   | 219   | 232   | 233   | 242   | 247   | 257   | 269   |
|            | 278   | 291   | 294   | 295   | 297   | 304   | 306   | 311   | 323   | 327   | 330   | 337   | 347   |
|            | 353   | 360   | 362   | 366   | 371   | 381   | 387   | 391   | 402   | 419   | 424   | 425   | 433   |
|            | 440   | 449   | 471   | 473   | 482   | 488   | 496   | 504   | 513   | 519   | 523   | 534   | 552   |
|            | 555   | 558   | 561   | 573   | 576   | 590   | 597   | 606   | 615   | 624   | 634   | 641   | 652   |
|            | 658   | 677   | 681   | 688   | 691   | 698   | 712   | 728   | 738   | 741   | 746   | 750   | 790   |
|            | 799   | 807   | 829   | 836   | 841   | 844   | 849   | 860   | 867   | 872   | 878   | 918   | 933   |
|            | 954   | 962   | 967   | 973   | 992   | 1003  | 1023  | 1025  | 1030  | 1041  | 1047  | 1055  | 1068  |
|            | 1070  | 1073  | 1075  | 1079  | 1099  | 1103  | 1105  | 1126  | 1139  | 1142  | 1146  | 1156  | 1173  |
|            | 1177  | 1181  | 1193  | 1200  | 1201  | 1210  | 1211  | 1214  | 1226  | 1229  | 1236  | 1238  | 1274  |
|            | 1278  | 1284  | 1292  | 1299  | 1322  | 1329  | 1330  | 1337  | 1338  | 1339  | 1343  | 1345  | 1360  |
|            | 1375  | 1380  | 1381  | 1382  | 1389  | 1394  | 1397  | 1407  | 1409  | 1412  | 1418  | 1419  | 1441  |
|            | 1453  | 1458  | 1459  | 1466  | 1480  | 1486  | 1487  | 1488  | 1502  | 1504  | 1504  | 1509  | 1519  |
|            | 1520  | 1555  | 1557  | 1563  | 1632  | 1634  | 1647  | 1658  | 1668  | 1671  | 1673  | 1681  | 1826  |
|            | 2964  | 3007  | 3017  | 3023  | 3040  | 3047  | 3049  | 3061  | 3065  | 3079  | 3091  | 3105  | 3124  |
|            | 3151  | 3154  | 3161  | 3166  | 3176  | 3202  | 3205  | 3214  | 3223  | 3237  | 3261  | 3605  | 3769  |
|            | 3780  | 3782  | 3795  | 3840  |       |       |       |       |       |       |       |       |       |

**Table S16.** Frequencies of Compound **4** at the B3LYP/6-31G\*\* Level in the Gas Phase (cm<sup>-1</sup>).

| species    | frequencies |    |    |    |    |    |    |    |    |    |    |    |    |
|------------|-------------|----|----|----|----|----|----|----|----|----|----|----|----|
| <b>4a1</b> | 7           | 10 | 12 | 21 | 30 | 31 | 40 | 45 | 52 | 60 | 75 | 81 | 82 |

|            |      |      |      |      |      |      |      |      |      |      |      |      |      |      |
|------------|------|------|------|------|------|------|------|------|------|------|------|------|------|------|
|            | 88   | 88   | 91   | 98   | 103  | 108  | 117  | 130  | 142  | 147  | 150  | 151  | 164  | 167  |
|            | 171  | 180  | 184  | 187  | 195  | 207  | 219  | 227  | 235  | 239  | 241  | 256  | 259  |      |
|            | 268  | 278  | 292  | 294  | 295  | 297  | 307  | 308  | 314  | 324  | 329  | 333  | 337  |      |
|            | 341  | 352  | 361  | 361  | 364  | 370  | 376  | 382  | 390  | 394  | 411  | 416  | 420  |      |
|            | 424  | 428  | 429  | 436  | 445  | 456  | 470  | 483  | 490  | 493  | 502  | 510  | 520  |      |
|            | 523  | 535  | 542  | 552  | 554  | 555  | 558  | 571  | 575  | 592  | 597  | 606  | 613  |      |
|            | 624  | 633  | 639  | 645  | 652  | 657  | 677  | 681  | 687  | 689  | 696  | 712  | 734  |      |
|            | 739  | 740  | 745  | 750  | 784  | 791  | 800  | 806  | 829  | 834  | 840  | 842  | 848  |      |
|            | 864  | 868  | 873  | 886  | 918  | 920  | 935  | 955  | 961  | 967  | 972  | 997  | 1016 | 1020 |
|            | 1025 | 1030 | 1043 | 1047 | 1057 | 1060 | 1064 | 1068 | 1072 | 1073 | 1075 | 1079 | 1096 | 1100 |
|            | 1125 | 1132 | 1136 | 1139 | 1154 | 1163 | 1168 | 1172 | 1177 | 1180 | 1191 | 1200 | 1201 | 1208 |
|            | 1213 | 1215 | 1228 | 1238 | 1247 | 1250 | 1253 | 1274 | 1279 | 1285 | 1296 | 1299 | 1316 | 1321 |
|            | 1329 | 1337 | 1343 | 1344 | 1348 | 1356 | 1359 | 1368 | 1376 | 1380 | 1382 | 1384 | 1388 | 1393 |
|            | 1407 | 1410 | 1414 | 1417 | 1424 | 1427 | 1435 | 1438 | 1444 | 1458 | 1459 | 1466 | 1480 | 1485 |
|            | 1489 | 1504 | 1506 | 1508 | 1509 | 1509 | 1513 | 1518 | 1520 | 1555 | 1556 | 1562 | 1632 | 1634 |
|            | 1647 | 1658 | 1667 | 1670 | 1673 | 1681 | 1708 | 1791 | 1828 | 3006 | 3016 | 3017 | 3025 | 3039 |
|            | 3047 | 3048 | 3048 | 3063 | 3080 | 3086 | 3093 | 3105 | 3124 | 3125 | 3152 | 3155 | 3164 | 3168 |
|            | 3175 | 3203 | 3204 | 3214 | 3226 | 3236 | 3255 | 3608 | 3731 | 3755 | 3782 | 3795 | 3798 | 3815 |
|            | 3840 |      |      |      |      |      |      |      |      |      |      |      |      |      |
| <b>4b1</b> | 7    | 9    | 16   | 22   | 27   | 32   | 37   | 44   | 51   | 59   | 68   | 76   | 80   |      |
|            | 85   | 90   | 94   | 96   | 103  | 110  | 115  | 131  | 140  | 148  | 151  | 153  | 161  | 163  |
|            | 174  | 179  | 183  | 186  | 194  | 208  | 222  | 224  | 232  | 241  | 244  | 256  | 259  |      |
|            | 268  | 273  | 292  | 294  | 295  | 298  | 305  | 307  | 314  | 323  | 327  | 330  | 335  |      |
|            | 341  | 351  | 359  | 361  | 365  | 369  | 379  | 381  | 390  | 394  | 412  | 416  | 420  |      |
|            | 424  | 428  | 433  | 437  | 444  | 452  | 470  | 483  | 487  | 492  | 500  | 507  | 518  |      |
|            | 524  | 535  | 541  | 551  | 554  | 555  | 559  | 569  | 575  | 592  | 596  | 606  | 612  |      |
|            | 623  | 631  | 640  | 642  | 651  | 658  | 676  | 682  | 687  | 692  | 695  | 709  | 735  |      |
|            | 739  | 740  | 746  | 752  | 784  | 792  | 801  | 806  | 830  | 833  | 838  | 840  | 848  |      |
|            | 856  | 868  | 874  | 886  | 917  | 920  | 934  | 954  | 962  | 966  | 972  | 1000 | 1016 | 1019 |
|            | 1024 | 1029 | 1043 | 1048 | 1057 | 1058 | 1061 | 1066 | 1072 | 1073 | 1075 | 1079 | 1097 | 1100 |
|            | 1112 | 1123 | 1132 | 1136 | 1140 | 1154 | 1164 | 1166 | 1176 | 1178 | 1180 | 1190 | 1200 | 1201 |
|            | 1208 | 1211 | 1212 | 1215 | 1228 | 1238 | 1247 | 1250 | 1253 | 1273 | 1278 | 1285 | 1296 | 1300 |
|            | 1315 | 1321 | 1328 | 1329 | 1338 | 1344 | 1345 | 1351 | 1356 | 1357 | 1368 | 1376 | 1379 | 1382 |
|            | 1384 | 1388 | 1393 | 1398 | 1406 | 1410 | 1413 | 1417 | 1425 | 1429 | 1437 | 1438 | 1447 | 1460 |
|            | 1460 | 1466 | 1474 | 1485 | 1488 | 1489 | 1500 | 1504 | 1505 | 1506 | 1508 | 1510 | 1518 | 1523 |
|            | 1555 | 1556 | 1563 | 1632 | 1635 | 1647 | 1659 | 1666 | 1671 | 1673 | 1681 | 1710 | 1791 | 1829 |
|            | 3009 | 3009 | 3017 | 3024 | 3037 | 3045 | 3047 | 3049 | 3063 | 3080 | 3087 | 3093 | 3106 | 3109 |
|            | 3125 | 3125 | 3152 | 3155 | 3164 | 3176 | 3185 | 3201 | 3203 | 3214 | 3227 | 3236 | 3282 | 3609 |
|            | 3730 | 3755 | 3782 | 3796 | 3797 | 3817 | 3840 |      |      |      |      |      |      |      |

**Table S17.** Key Transitions and Their Related Rotatory and Oscillator Strengths of **1** at the B3LYP-SCRF//B3LYP/6-31G\*\* Level with COSMO Model in MeOH.

| species | transition | $\Delta E^a$ (eV) | $\lambda^b$ (nm) | $f^c$ | $R_{\text{vel}}^d$ | $R_{\text{len}}^e$ |
|---------|------------|-------------------|------------------|-------|--------------------|--------------------|
|         | 126→127    | 3.46              | 358              | 0.076 | 11.1               | 11.8               |

|            |         |      |     |       |       |       |
|------------|---------|------|-----|-------|-------|-------|
|            | 125→127 | 3.80 | 326 | 0.022 | -21.4 | -22.3 |
|            | 124→127 | 4.54 | 273 | 0.304 | -21.6 | -19.5 |
|            | 126v128 | 5.06 | 245 | 0.025 | 16.3  | 15.6  |
| <b>1b1</b> | 126→127 | 3.47 | 357 | 0.080 | 7.0   | 5.8   |
|            | 125→127 | 3.78 | 328 | 0.020 | -18.0 | -19.3 |
|            | 124→127 | 4.53 | 273 | 0.301 | -21.1 | -23.3 |
|            | 125→128 | 5.07 | 245 | 0.033 | 7.6   | 6.9   |

<sup>a</sup> Excitation energy. <sup>b</sup> Wavelength. <sup>c</sup> Oscillator strength. <sup>d</sup> Rotatory strength in velocity form ( $10^{-40}$  cgs). <sup>e</sup> Rotatory strength in length form ( $10^{-40}$  cgs).

**Table S18.** Key Transitions and Their Related Rotatory and Oscillator Strengths of **L-1a1** at the B3LYP/6-31G\*\* Level in the Gas Phase.

| species      | transition | $\Delta E^a$ (eV) | $\lambda^b$ (nm) | $f^c$ | $R_{\text{vel}}^d$ | $R_{\text{len}}^e$ |
|--------------|------------|-------------------|------------------|-------|--------------------|--------------------|
| <b>L-1a1</b> | 126→127    | 3.51              | 353              | 0.068 | 10.3               | 11.7               |
|              | 125→127    | 3.88              | 320              | 0.019 | -21.2              | -23.0              |
|              | 122→127    | 4.22              | 294              | 0.006 | 6.2                | 5.4                |
|              | 124→127    | 4.61              | 269              | 0.233 | -32.5              | -30.6              |
|              | 126→129    | 5.20              | 239              | 0.018 | 9.0                | 8.4                |
|              | 120→127    | 5.22              | 237              | 0.001 | -1.6               | -2.0               |

<sup>a</sup> Excitation energy. <sup>b</sup> Wavelength. <sup>c</sup> Oscillator strength. <sup>d</sup> Rotatory strength in velocity form ( $10^{-40}$  cgs). <sup>e</sup> Rotatory strength in length form ( $10^{-40}$  cgs).

**Table S19.** Key Transitions and Their Related Rotatory and Oscillator Strengths of **2b1** at the B3LYP/6-31G\*\* Level in the Gas Phase.

| transition | $\Delta E^a$ (eV) | $\lambda^b$ (nm) | $f^c$ | $R_{\text{vel}}^d$ | $R_{\text{len}}^e$ |
|------------|-------------------|------------------|-------|--------------------|--------------------|
| 203→204    | 3.49              | 355              | 0.066 | 1.2                | -4.1               |
| 202→205    | 3.85              | 322              | 0.045 | -9.0               | -15.1              |
| 201→204    | 3.93              | 315              | 0.012 | -17.4              | -19.2              |
| 202→206    | 4.24              | 293              | 0.072 | -42.5              | -47.0              |

|         |      |     |       |       |       |
|---------|------|-----|-------|-------|-------|
| 199→204 | 4.58 | 271 | 0.273 | -48.2 | -53.5 |
| 197→205 | 4.67 | 266 | 0.020 | -17.3 | -18.7 |
| 198→206 | 4.98 | 249 | 0.037 | -4.1  | -12.4 |
| 202→208 | 4.99 | 248 | 0.088 | 48.4  | 49.7  |
| 197→206 | 5.10 | 243 | 0.040 | 50.7  | 54.3  |
| 191→205 | 5.22 | 237 | 0.011 | -13.6 | -16.3 |
| 200→208 | 5.31 | 234 | 0.143 | 4.0   | 18.8  |

<sup>a</sup> Excitation energy. <sup>b</sup> Wavelength. <sup>c</sup> Oscillator strength. <sup>d</sup> Rotatory strength in velocity form ( $10^{-40}$  cgs). <sup>e</sup> Rotatory strength in length form ( $10^{-40}$  cgs).

**Table S20.** Key Transitions, Oscillator Strengths, and Rotatory Strengths of Conformer **3a1** of compound **3** at the B3LYP/6-31G\*\* Level in the Gas Phase.

| excited state | $\Delta E^a$ (eV) | $\lambda^b$ (nm) | $f^c$ | $R_{vel}^d$ | $R_{len}^e$ |
|---------------|-------------------|------------------|-------|-------------|-------------|
| 203→204       | 3.47              | 357              | 0.062 | 10.8        | 13.9        |
| 200→204       | 3.92              | 316              | 0.012 | -21.8       | -23.5       |
| 202→206       | 4.16              | 298              | 0.064 | 4.9         | 1.1         |
| 201→205       | 4.33              | 286              | 0.058 | 25.3        | 26.2        |
| 201→206       | 4.49              | 276              | 0.115 | -38.6       | -42.4       |
| 199→204       | 4.57              | 271              | 0.004 | 2.1         | 2.3         |
| 198→204       | 4.60              | 270              | 0.244 | 32.2        | 36.5        |
| 199→205       | 4.66              | 266              | 0.043 | 22.9        | 26.7        |
| 199→206       | 4.83              | 257              | 0.091 | 17.5        | 14.5        |
| 197→206       | 5.01              | 247              | 0.062 | -134.1      | -144.6      |
| 200→207       | 5.12              | 242              | 0.021 | 1.4         | -4.3        |
| 201→208       | 5.29              | 234              | 0.014 | 21.5        | 26.2        |

<sup>a</sup> Excitation energy. <sup>b</sup> Wavelength. <sup>c</sup> Oscillator strength. <sup>d</sup> Rotatory strength in velocity form ( $10^{-40}$  cgs). <sup>e</sup> Rotatory strength in length form ( $10^{-40}$  cgs).

**Table S21.** Key Transitions, Oscillator Strengths, and Rotatory Strengths of Compound **4** at the B3LYP/6-31G\*\* Level in the Gas Phase.



| species    | excited state | $\Delta E^a$ (eV) | $\lambda^b$ (nm) | $f^c$  | $R_{vel}^d$ | $R_{len}^e$ |
|------------|---------------|-------------------|------------------|--------|-------------|-------------|
| <b>4a1</b> | 202→204       | 3.5069            | 353.54           | 0.0668 | 13.9304     | 18.7242     |
|            | 200→204       | 3.8688            | 320.47           | 0.0154 | -23.0954    | -24.2140    |
|            | 203→206       | 4.1666            | 297.57           | 0.0569 | -12.3109    | -15.8354    |
|            | 201→205       | 4.3093            | 287.71           | 0.0657 | -34.9020    | -38.3278    |
|            | 201→206       | 4.4947            | 275.85           | 0.1024 | 28.0704     | 31.8707     |
|            | 198→204       | 4.5960            | 269.77           | 0.2553 | -114.2482   | -115.9900   |
|            | 199→205       | 4.6789            | 264.98           | 0.0451 | -27.0822    | -29.2683    |
|            | 199→205       | 4.8306            | 256.66           | 0.0958 | -13.7940    | -11.5774    |
|            | 203→209       | 5.0076            | 247.59           | 0.1089 | 171.1894    | 180.8287    |
|            | 197→206       | 5.0555            | 245.25           | 0.0655 | -38.8400    | -45.4286    |
|            | 198→205       | 5.3297            | 232.63           | 0.0874 | -17.0730    | -19.2904    |
| <b>4b1</b> | 202→204       | 3.4982            | 354.42           | 0.0622 | 9.5191      | 5.6905      |
|            | 200→204       | 3.8901            | 318.71           | 0.0148 | -15.3622    | -17.1611    |
|            | 203→206       | 4.1735            | 297.07           | 0.0589 | -6.3313     | -11.2453    |
|            | 201→205       | 4.3161            | 287.26           | 0.0641 | -21.7037    | -23.8069    |
|            | 201→206       | 4.4959            | 275.77           | 0.0979 | 33.6459     | 37.1557     |
|            | 198→204       | 4.6074            | 269.10           | 0.2403 | -89.0553    | -94.6709    |
|            | 199→205       | 4.6873            | 264.51           | 0.0441 | -29.0002    | -32.6137    |
|            | 199→205       | 4.8392            | 256.21           | 0.0910 | -11.2914    | -7.1404     |
|            | 203→209       | 5.0079            | 247.58           | 0.1187 | 172.7144    | 181.2018    |
|            | 197→206       | 5.0611            | 244.98           | 0.0553 | -44.3572    | -49.7353    |
|            | 201→209       | 5.2814            | 234.76           | 0.0090 | 9.7549      | 12.3116     |

<sup>a</sup> Excitation energy. <sup>b</sup> Wavelength. <sup>c</sup> Oscillator strength. <sup>d</sup> Rotatory strength in velocity form ( $10^{-40}$  cgs). <sup>e</sup> Rotatory strength in length form ( $10^{-40}$  cgs).
